# Supplementary material for: An evidence-based knowledgebase of pulmonary arterial hypertension to identify genes and pathways relevant to pathogenesis
Source: Royal Society of Chemistry journal article supplement (doi:10.1039/c3mb70496c), 2014-01-10
Supplement: c3mb70496c.xlsx [file c3mb70496c.xlsx]

## Sheet: TableS1
Table S1. List of the 341 human PH-related genes collected in this study.
Entrez Gene ID	PH type	Gene symbol	Synonym	Chromosome	Cytoband	Full name	Gene type	Description
4090	PH,HPH,PAH,	SMAD5	DWFC|JV5-1|MADH5	5	5q31	SMAD family member 5	protein-coding	MAD, mothers against decapentaplegic homolog 5|SMA- and MAD-related protein 5|SMAD, mothers against DPP homolog 5|mothers against decapentaplegic homolog 5|mothers against decapentaplegic, drosophila, homolog of, 5
3162	PH,HPH,PAH,	HMOX1	HMOX1D|HO-1|HSP32|bK286B10	22	22q13.1	heme oxygenase (decycling) 1	protein-coding	heat shock protein, 32-kD|heme oxygenase 1
7225	PH,HPH,PAH,	TRPC6	FSGS2|TRP6	11	11q22.1	transient receptor potential cation channel, subfamily C, member 6	protein-coding	TRP-6|short transient receptor potential channel 6|transient receptor protein 6
1906	PH,HPH,PAH,	EDN1	ET1|HDLCQ7|PPET1	6	6p24.1	endothelin 1	protein-coding	endothelin-1|preproendothelin-1
6093	PH,HPH,PAH,	ROCK1	P160ROCK|ROCK-I	18	18q11.1	Rho-associated, coiled-coil containing protein kinase 1	protein-coding	Rho kinase|p160 ROCK-1|p160-ROCK|renal carcinoma antigen NY-REN-35|rho-associated protein kinase 1|rho-associated, coiled-coil-containing protein kinase 1|rho-associated, coiled-coil-containing protein kinase I
650	PH,HPH,PAH,	BMP2	BDA2|BMP2A	20	20p12	bone morphogenetic protein 2	protein-coding	BMP-2A|bone morphogenetic protein 2A
7166	PH,HPH,PAH,	TPH1	TPRH|TRPH	11	11p15.3-p14	tryptophan hydroxylase 1	protein-coding	L-tryptophan hydroxylase|indoleacetic acid-5-hydroxylase|tryptophan 5-hydroxylase 1|tryptophan 5-monooxygenase 1|tryptophan hydroxylase (tryptophan 5-monooxygenase)
4843	PH,HPH,PAH,	NOS2	HEP-NOS|INOS|NOS|NOS2A	17	17q11.2-q12	nitric oxide synthase 2, inducible	protein-coding	NOS type II|NOS, type II|hepatocyte NOS|inducible NO synthase|inducible NOS|nitric oxide synthase 2A (inducible, hepatocytes)|nitric oxide synthase, inducible|nitric oxide synthase, macrophage|peptidyl-cysteine S-nitrosylase NOS2
659	PH,HPH,PAH,	BMPR2	BMPR-II|BMPR3|BMR2|BRK-3|PPH1|T-ALK	2	2q33-q34	bone morphogenetic protein receptor, type II (serine/threonine kinase)	protein-coding	BMP type II receptor|BMP type-2 receptor|BMPR-2|bone morphogenetic protein receptor type II|bone morphogenetic protein receptor type-2|type II activin receptor-like kinase|type II receptor for bone morphogenetic protein-4
6532	PH,HPH,PAH,	SLC6A4	5-HTT|5-HTTLPR|5HTT|HTT|OCD1|SERT|SERT1|hSERT	17	17q11.2	solute carrier family 6 (neurotransmitter transporter, serotonin), member 4	protein-coding	5-hydroxytryptamine transporter|5HT transporter|Na+/Cl- dependent serotonin transporter|sodium-dependent serotonin transporter
1588	PH,PAH,	CYP19A1	ARO|ARO1|CPV1|CYAR|CYP19|CYPXIX|P-450AROM	15	15q21.1	cytochrome P450, family 19, subfamily A, polypeptide 1	protein-coding	aromatase|cytochrome P-450AROM|cytochrome P450 19A1|cytochrome P450, subfamily XIX (aromatization of androgens)|estrogen synthase|estrogen synthetase|flavoprotein-linked monooxygenase|microsomal monooxygenase
4093	PH,PAH,	SMAD9	MADH6|MADH9|SMAD8|SMAD8A|SMAD8B	13	13q12-q14	SMAD family member 9	protein-coding	MAD homolog 9|Mothers against decapentaplegic, drosophila, homolog of, 9|SMAD, mothers against DPP homolog 9|mothers against decapentaplegic homolog 9
3741	PH,PAH,	KCNA5	ATFB7|HCK1|HK2|HPCN1|KV1.5|PCN1	12	12p13	potassium voltage-gated channel, shaker-related subfamily, member 5	protein-coding	cardiac potassium channel|insulinoma and islet potassium channel|potassium channel 1|potassium voltage-gated channel subfamily A member 5|voltage-gated potassium channel HK2|voltage-gated potassium channel protein Kv1.5|voltage-gated potassium channel subunit Kv1.5
4087	PH,PAH,	SMAD2	JV18|JV18-1|MADH2|MADR2|hMAD-2|hSMAD2	18	18q21.1	SMAD family member 2	protein-coding	MAD homolog 2|SMAD, mothers against DPP homolog 2|Sma- and Mad-related protein 2|mother against DPP homolog 2|mothers against decapentaplegic homolog 2
7432	PH,PAH,	VIP	PHM27	6	6q25	vasoactive intestinal peptide	protein-coding	VIP peptides|prepro-VIP
23417	PH,PAH,	MLYCD	MCD	16	16q24	malonyl-CoA decarboxylase	protein-coding	malonyl coenzyme A decarboxylase|malonyl-CoA decarboxylase, mitochondrial
5054	PH,PAH,	SERPINE1	PAI|PAI-1|PAI1|PLANH1	7	7q22.1	serpin peptidase inhibitor, clade E (nexin, plasminogen activator inhibitor type 1), member 1	protein-coding	endothelial plasminogen activator inhibitor|plasminogen activator inhibitor 1|serine (or cysteine) proteinase inhibitor, clade E (nexin, plasminogen activator inhibitor type 1), member 1|serpin E1
4086	PH,PAH,	SMAD1	BSP-1|BSP1|JV4-1|JV41|MADH1|MADR1	4	4q31	SMAD family member 1	protein-coding	MAD homolog 1|MAD, mothers against decapentaplegic homolog 1|Mad-related protein 1|SMAD, mothers against DPP homolog 1|TGF-beta signaling protein 1|mothers against DPP homolog 1|mothers against decapentaplegic homolog 1|transforming growth factor-beta signaling protein 1|transforming growth factor-beta-signaling protein 1
7048	PH,PAH,	TGFBR2	AAT3|FAA3|LDS1B|LDS2B|MFS2|RIIC|TAAD2|TGFR-2|TGFbeta-RII	3	3p22	transforming growth factor, beta receptor II (70/80kDa)	protein-coding	TGF-beta receptor type IIB|TGF-beta receptor type-2|TGF-beta type II receptor|tbetaR-II|transforming growth factor beta receptor type IIC|transforming growth factor, beta receptor II (70/80kDa) isoform 1|transforming growth factor, beta receptor II (70/80kDa) isoform 2
4313	PH,PAH,	MMP2	CLG4|CLG4A|MMP-II|MONA|TBE-1	16	16q13-q21	matrix metallopeptidase 2 (gelatinase A, 72kDa gelatinase, 72kDa type IV collagenase)	protein-coding	72 kDa gelatinase|72 kDa type IV collagenase|MMP-2|collagenase type IV-A|gelatinase A|matrix metalloproteinase-2|matrix metalloproteinase-II|neutrophil gelatinase
348	PH,PAH,	APOE	AD2|LDLCQ5|LPG	19	19q13.2	apolipoprotein E	protein-coding	apo-E|apolipoprotein E3
3091	HPH,PAH,	HIF1A	HIF-1A|HIF-1alpha|HIF1|HIF1-ALPHA|MOP1|PASD8|bHLHe78	14	14q23.2	hypoxia inducible factor 1, alpha subunit (basic helix-loop-helix transcription factor)	protein-coding	ARNT interacting protein|ARNT-interacting protein|HIF-1-alpha|PAS domain-containing protein 8|basic-helix-loop-helix-PAS protein MOP1|class E basic helix-loop-helix protein 78|hypoxia-inducible factor 1 alpha isoform I.3|hypoxia-inducible factor 1, alpha subunit (basic helix-loop-helix transcription factor)|hypoxia-inducible factor 1-alpha|hypoxia-inducible factor1alpha|member of PAS protein 1|me…
7222	PH,PAH,	TRPC3	TRP3	4	4q27	transient receptor potential cation channel, subfamily C, member 3	protein-coding	hTrp-3|short transient receptor potential channel 3|transient receptor protein 3
79924	PH,HPH,	ADM2	AM2|dJ579N16.4	22	22q13.33	adrenomedullin 2	protein-coding	intermedin
10399	PH,PAH,	GNB2L1	Gnb2-rs1|H12.3|HLC-7|PIG21|RACK1	5	5q35.3	guanine nucleotide binding protein (G protein), beta polypeptide 2-like 1	protein-coding	cell proliferation-inducing gene 21 protein|guanine nucleotide-binding protein subunit beta-2-like 1|guanine nucleotide-binding protein subunit beta-like protein 12.3|human lung cancer oncogene 7 protein|lung cancer oncogene 7|proliferation-inducing gene 21|protein homologous to chicken B complex protein, guanine nucleotide binding|receptor for activated C kinase 1|receptor of activated protein k…
2353	PH,PAH,	FOS	AP-1|C-FOS|p55	14	14q24.3	FBJ murine osteosarcoma viral oncogene homolog	protein-coding	FBJ murine osteosarcoma viral (v-fos) oncogene homolog (oncogene FOS)|G0/G1 switch regulatory protein 7|activator protein 1|cellular oncogene c-fos|proto-oncogene c-Fos
406937	PH,PAH,	MIR145	MIRN145|miR-145|miRNA145	5	5q32	microRNA 145	miscRNA	-
1051	PH,PAH,	CEBPB	C/EBP-beta|CRP2|IL6DBP|LAP|NF-IL6|TCF5	20	20q13.1	CCAAT/enhancer binding protein (C/EBP), beta	protein-coding	CCAAT/enhancer-binding protein beta|TCF-5|interleukin 6-dependent DNA-binding protein|liver-enriched transcriptional activator protein|nuclear factor NF-IL6|nuclear factor of interleukin 6|transcription factor 5
94	PH,PAH,	ACVRL1	ACVRLK1|ALK-1|ALK1|HHT|HHT2|ORW2|SKR3|TSR-I	12	12q13.13	activin A receptor type II-like 1	protein-coding	TGF-B superfamily receptor type I|activin A receptor, type II-like kinase 1|serine/threonine-protein kinase receptor R3
652	HPH,PAH,	BMP4	BMP2B|BMP2B1|MCOPS6|OFC11|ZYME	14	14q22-q23	bone morphogenetic protein 4	protein-coding	BMP-2B|BMP-4|bone morphogenetic protein 2B
2273	PH,PAH,	FHL1	FHL-1|FHL1A|FHL1B|FLH1A|KYOT|SLIM|SLIM-1|SLIM1|SLIMMER|XMPMA	X	Xq26	four and a half LIM domains 1	protein-coding	LIM protein SLIMMER|four and a half LIM domains protein 1|four-and-a-half Lin11, Isl-1 and Mec-3 domains 1|skeletal muscle LIM-protein 1|skeletal muscle LIM-protein1
384	PH,PAH,	ARG2	-	14	14q24.1	arginase, type II	protein-coding	L-arginine amidinohydrolase|L-arginine ureahydrolase|arginase 2|arginase-2, mitochondrial|kidney arginase|kidney-type arginase|non-hepatic arginase|nonhepatic arginase|type II arginase
775	PH,HPH,	CACNA1C	CACH2|CACN2|CACNL1A1|CCHL1A1|CaV1.2|LQT8|TS	12	12p13.3	calcium channel, voltage-dependent, L type, alpha 1C subunit	protein-coding	DHPR, alpha-1 subunit|calcium channel, L type, alpha-1 polypeptide, isoform 1, cardiac muscle|calcium channel, cardic dihydropyridine-sensitive, alpha-1 subunit|voltage-dependent L-type calcium channel subunit alpha-1C|voltage-gated L-type calcium channel Cav1.2 alpha 1 subunit, splice variant 10*
5468	PH,PAH,	PPARG	CIMT1|GLM1|NR1C3|PPARG1|PPARG2|PPARgamma	3	3p25	peroxisome proliferator-activated receptor gamma	protein-coding	PPAR gamma|PPAR-gamma|nuclear receptor subfamily 1 group C member 3|peroxisome proliferator-activated nuclear receptor gamma variant 1|peroxisome proliferator-activated receptor gamma 1
406991	PH,PAH,	MIR21	MIRN21|hsa-mir-21|miR-21|miRNA21	17	17q23.1	microRNA 21	miscRNA	-
857	PH,PAH,	CAV1	BSCL3|CGL3|MSTP085|VIP21	7	7q31.1	caveolin 1, caveolae protein, 22kDa	protein-coding	caveolin-1|cell growth-inhibiting protein 32
7422	HPH,PAH,	VEGFA	MVCD1|VEGF|VPF	6	6p12	vascular endothelial growth factor A	protein-coding	vascular permeability factor
1909	PH,PAH,	EDNRA	ET-A|ETA|ETA-R|ETAR|ETRA|hET-AR	4	4q31.22	endothelin receptor type A	protein-coding	G protein-coupled receptor|endothelin receptor subtype A|endothelin-1 receptor|endothelin-1-specific receptor
284	PH,PAH,	ANGPT1	AGP1|AGPT|ANG1	8	8q23.1	angiopoietin 1	protein-coding	ANG-1|angiopoietin-1
4775	PH,PAH,	NFATC3	NFAT4|NFATX	16	16q22.2	nuclear factor of activated T-cells, cytoplasmic, calcineurin-dependent 3	protein-coding	NF-ATc3|T cell transcription factor NFAT4|nuclear factor of activated T-cells c3 isoform IE-Xa|nuclear factor of activated T-cells, cytoplasmic 3
7076	PH,PAH,	TIMP1	CLGI|EPA|EPO|HCI|TIMP	X	Xp11.3-p11.23	TIMP metallopeptidase inhibitor 1	protein-coding	TIMP-1|collagenase inhibitor|erythroid potentiating activity|erythroid-potentiating activity|fibroblast collagenase inhibitor|metalloproteinase inhibitor 1|tissue inhibitor of metalloproteinases 1
1910	PH,PAH,	EDNRB	ABCDS|ET-B|ET-BR|ETB|ETBR|ETRB|HSCR|HSCR2|WS4A	13	13q22	endothelin receptor type B	protein-coding	endothelin B receptor|endothelin receptor non-selective type
2658	PH,PAH,	GDF2	BMP-9|BMP9	10	10q11.22	growth differentiation factor 2	protein-coding	GDF-2|bone morphogenetic protein 9|growth/differentiation factor 2
4846	PH,PAH,	NOS3	ECNOS|eNOS	7	7q36	nitric oxide synthase 3 (endothelial cell)	protein-coding	EC-NOS|NOS type III|NOSIII|cNOS|constitutive NOS|endothelial NOS|nitric oxide synthase, endothelial
1956	PH,PAH,	EGFR	ERBB|ERBB1|HER1|PIG61|mENA	7	7p12	epidermal growth factor receptor	protein-coding	avian erythroblastic leukemia viral (v-erb-b) oncogene homolog|cell growth inhibiting protein 40|cell proliferation-inducing protein 61|proto-oncogene c-ErbB-1|receptor tyrosine-protein kinase erbB-1
2099	PH,PAH,	ESR1	ER|ESR|ESRA|Era|NR3A1	6	6q25.1	estrogen receptor 1	protein-coding	ER-alpha|estradiol receptor|estrogen nuclear receptor alpha|estrogen receptor|estrogen receptor alpha 3*,4,5,6,7*/822 isoform|estrogen receptor alpha E1-E2-1-2|estrogen receptor alpha E1-N2-E2-1-2|estrogen receptor alpha delta 3*,4,5,6,7*,8*/941 isoform|estrogen receptor alpha delta 3*,4,5,6,7*/819-2 isoform|estrogen receptor alpha delta 4 +49 isoform|estrogen receptor alpha delta 4*,5,6,7*/654 i…
2982	PH,PAH,	GUCY1A3	GC-SA3|GUC1A3|GUCA3|GUCSA3|GUCY1A1	4	4q31.1-q31.2	guanylate cyclase 1, soluble, alpha 3	protein-coding	GC-S-alpha-1|GCS-alpha-1|GCS-alpha-3|guanylate cyclase soluble subunit alpha-3|soluble guanylate cyclase large subunit
3351	PH,PAH,	HTR1B	5-HT1B|5-HT1DB|HTR1D2|HTR1DB|S12	6	6q13	5-hydroxytryptamine (serotonin) receptor 1B, G protein-coupled	protein-coding	5-HT-1B|5-HT-1D-beta|5-hydroxytryptamine receptor 1B|serotonin 1D beta receptor|serotonin receptor 1B
3397	PH,PAH,	ID1	ID|bHLHb24	20	20q11	inhibitor of DNA binding 1, dominant negative helix-loop-helix protein	protein-coding	DNA-binding protein inhibitor ID-1|class B basic helix-loop-helix protein 24|dJ857M17.1.2 (inhibitor of DNA binding 1, dominant negative helix-loop-helix protein)|inhibitor of differentiation 1
3371	PH,PAH,	TNC	150-225|GMEM|GP|HXB|JI|TN|TN-C	9	9q33	tenascin C	protein-coding	GP 150-225|cytotactin|glioma-associated-extracellular matrix antigen|hexabrachion (tenascin)|myotendinous antigen|neuronectin|tenascin|tenascin-C isoform 14/AD1/16
2022	PH,PAH,	ENG	CD105|END|HHT1|ORW|ORW1	9	9q34.11	endoglin	protein-coding	CD105 antigen
4854	PH,PAH,	NOTCH3	CADASIL|CASIL	19	19p13.2-p13.1	notch 3	protein-coding	Notch homolog 3|neurogenic locus notch homolog protein 3
4773	PH,PAH,	NFATC2	NFAT1|NFATP	20	20q13.2	nuclear factor of activated T-cells, cytoplasmic, calcineurin-dependent 2	protein-coding	NF-ATc2|NFAT pre-existing subunit|NFAT transcription complex, preexisting component|T cell transcription factor NFAT1|T-cell transcription factor NFAT1|nuclear factor of activated T-cells, cytoplasmic 2|nuclear factor of activated T-cells, preexisting component|preexisting nuclear factor of activated T-cells 2
5743	PH,HPH,	PTGS2	COX-2|COX2|GRIPGHS|PGG/HS|PGHS-2|PHS-2|hCox-2	1	1q25.2-q25.3	prostaglandin-endoperoxide synthase 2 (prostaglandin G/H synthase and cyclooxygenase)	protein-coding	PGH synthase 2|PHS II|cyclooxygenase 2b|prostaglandin G/H synthase 2|prostaglandin H2 synthase 2
5740	PH,PAH,	PTGIS	CYP8|CYP8A1|PGIS|PTGI	20	20q13.13	prostaglandin I2 (prostacyclin) synthase	protein-coding	cytochrome P450, family 8, subfamily A, polypeptide 1|prostacyclin synthase|prostaglandin I2 synthase
3082	PH,PAH,	HGF	DFNB39|F-TCF|HGFB|HPTA|SF	7	7q21.1	hepatocyte growth factor (hepapoietin A; scatter factor)	protein-coding	fibroblast-derived tumor cytotoxic factor|hepatocyte growth factor|hepatopoeitin-A|hepatopoietin-A|lung fibroblast-derived mitogen
658	PH,PAH,	BMPR1B	ALK-6|ALK6|CDw293	4	4q22-q24	bone morphogenetic protein receptor, type IB	protein-coding	BMP type-1B receptor|BMPR-1B|activin receptor-like kinase 6|bone morphogenetic protein receptor type-1B|serine/threonine receptor kinase
1524	PH,PAH,	CX3CR1	CCRL1|CMKBRL1|CMKDR1|GPR13|GPRV28|V28	3	3p21.3	chemokine (C-X3-C motif) receptor 1	protein-coding	C-X3-C CKR-1|CMK-BRL-1|CMK-BRL1|CX3C chemokine receptor 1|G protein-coupled receptor 13|G-protein coupled receptor 13|beta chemokine receptor-like 1|chemokine (C-C) receptor-like 1|chemokine (C-X3-C) receptor 1|fractalkine receptor
7046	PH,PAH,	TGFBR1	AAT5|ACVRLK4|ALK-5|ALK5|LDS1A|LDS2A|MSSE|SKR4|TGFR-1	9	9q22	transforming growth factor, beta receptor 1	protein-coding	TGF-beta receptor type I|TGF-beta receptor type-1|TGF-beta type I receptor|activin A receptor type II-like kinase, 53kD|activin A receptor type II-like kinase, 53kDa|activin A receptor type II-like protein kinase of 53kD|activin receptor-like kinase 5|serine/threonine-protein kinase receptor R4|tbetaR-I|transforming growth factor beta receptor I|transforming growth factor, beta receptor I (activi…
7040	PH,PAH,	TGFB1	CED|DPD1|LAP|TGFB|TGFbeta	19	19q13.1	transforming growth factor, beta 1	protein-coding	TGF-beta 1 protein|TGF-beta-1|latency-associated peptide|transforming growth factor beta-1
7010	PAH,	TEK	CD202B|TIE-2|TIE2|VMCM|VMCM1	9	9p21	TEK tyrosine kinase, endothelial	protein-coding	angiopoietin-1 receptor|endothelial tyrosine kinase|hTIE2|p140 TEK|soluble TIE2 variant 1|soluble TIE2 variant 2|tunica interna endothelial cell kinase|tyrosine kinase with Ig and EGF homology domains-2|tyrosine-protein kinase receptor TEK|tyrosine-protein kinase receptor TIE-2
959	PAH,	CD40LG	CD154|CD40L|HIGM1|IGM|IMD3|T-BAM|TNFSF5|TRAP|gp39|hCD40L	X	Xq26	CD40 ligand	protein-coding	CD40 antigen ligand|CD40-L|T-B cell-activating molecule|T-cell antigen Gp39|TNF-related activation protein|tumor necrosis factor (ligand) superfamily member 5
81839	PAH,	VANGL1	KITENIN|LPP2|STB2|STBM2	1	1p13.1	VANGL planar cell polarity protein 1	protein-coding	KAI1 C-terminal interacting tetraspanin|loop-tail protein 2 homolog|strabismus 2|van Gogh-like protein 1|vang-like 1 (van gogh, Drosophila)|vang-like protein 1
6347	PH,	CCL2	GDCF-2|HC11|HSMCR30|MCAF|MCP-1|MCP1|SCYA2|SMC-CF	17	17q11.2-q12	chemokine (C-C motif) ligand 2	protein-coding	C-C motif chemokine 2|monocyte chemoattractant protein 1|monocyte chemoattractant protein-1|monocyte chemotactic and activating factor|monocyte chemotactic protein 1|monocyte secretory protein JE|small inducible cytokine A2 (monocyte chemotactic protein 1, homologous to mouse Sig-je)|small inducible cytokine subfamily A (Cys-Cys), member 2|small-inducible cytokine A2
3791	PH,	KDR	CD309|FLK1|VEGFR|VEGFR2	4	4q11-q12	kinase insert domain receptor (a type III receptor tyrosine kinase)	protein-coding	fetal liver kinase 1|fetal liver kinase-1|protein-tyrosine kinase receptor Flk-1|soluble VEGFR2|tyrosine kinase growth factor receptor|vascular endothelial growth factor receptor 2
3596	PAH,	IL13	ALRH|BHR1|IL-13|P600	5	5q31	interleukin 13	protein-coding	Bronchial hyperresponsiveness-1 (bronchial asthma)|allergic rhinitis|interleukin-13
1950	PAH,	EGF	HOMG4|URG	4	4q25	epidermal growth factor	protein-coding	beta-urogastrone|pro-epidermal growth factor
331	PAH,	XIAP	API3|BIRC4|IAP-3|ILP1|MIHA|XLP2|hIAP-3|hIAP3	X	Xq25	X-linked inhibitor of apoptosis	protein-coding	E3 ubiquitin-protein ligase XIAP|IAP-like protein|X-linked IAP|baculoviral IAP repeat-containing protein 4|inhibitor of apoptosis protein 3
5157	PAH,	PDGFRL	PDGRL|PRLTS	8	8p22-p21.3	platelet-derived growth factor receptor-like	protein-coding	PDGF receptor beta-like tumor suppressor|PDGFR-like protein|platelet-derived growth factor receptor-like protein|platelet-derived growth factor-beta-like tumor suppressor
5578	HPH,	PRKCA	AAG6|PKC-alpha|PKCA|PRKACA	17	17q22-q23.2	protein kinase C, alpha	protein-coding	PKC-A|aging-associated gene 6|protein kinase C alpha type
3037	PAH,	HAS2	-	8	8q24.12	hyaluronan synthase 2	protein-coding	HA synthase 2|hyaluronate synthase 2|hyaluronic acid synthase 2
7049	PAH,	TGFBR3	BGCAN|betaglycan	1	1p33-p32	transforming growth factor, beta receptor III	protein-coding	TGF-beta receptor type 3|TGF-beta receptor type III|TGFR-3|betaglycan proteoglycan|transforming growth factor beta receptor type 3
114907	PH,	FBXO32	Fbx32|MAFbx	8	8q24.13	F-box protein 32	protein-coding	F-box only protein 32|atrogin 1|atrogin-1|muscle atrophy F-box protein
1490	PH,	CTGF	CCN2|HCS24|IGFBP8|NOV2	6	6q23.1	connective tissue growth factor	protein-coding	CCN family member 2|IBP-8|IGF-binding protein 8|IGFBP-8|hypertrophic chondrocyte-specific protein 24|insulin-like growth factor-binding protein 8
10614	PH,	HEXIM1	CLP1|EDG1|HIS1|MAQ1	17	17q21.31	hexamethylene bis-acetamide inducible 1	protein-coding	HMBA-inducible|cardiac lineage protein 1|estrogen down-regulated gene 1 protein|hexamethylene bis-acetamide-inducible protein 1|hexamethylene bisacetamide-inducible protein|hexamethylene-bis-acetamide-inducible transcript 1|hexamthylene bis-acetamide inducible 1|menage a quatre 1|menage a quatre protein 1|protein HEXIM1
407018	PH,	MIR27A	MIR27|MIRN27A	19	19p13.13	microRNA 27a	miscRNA	-
9034	PAH,	CCRL2	CKRX|CRAM|CRAM-A|CRAM-B|HCR	3	3p21	chemokine (C-C motif) receptor-like 2	protein-coding	C-C chemokine receptor-like 2|chemokine receptor CCR11|chemokine receptor X|putative MCP-1 chemokine receptor
846	PH,	CASR	CAR|EIG8|FHH|FIH|GPRC2A|HHC|HHC1|NSHPT|PCAR1	3	3q13	calcium-sensing receptor	protein-coding	extracellular calcium-sensing receptor|parathyroid Ca(2+)-sensing receptor 1|parathyroid cell calcium-sensing receptor
29843	HPH,	SENP1	SuPr-2	12	12q13.1	SUMO1/sentrin specific peptidase 1	protein-coding	SUMO1/sentrin specific protease 1|sentrin-specific protease 1|sentrin/SUMO-specific protease SENP1
1849	PAH,	DUSP7	MKPX|PYST2	3	3p21	dual specificity phosphatase 7	protein-coding	dual specificity protein phosphatase 7|dual specificity protein phosphatase PYST2|dual-specificity phosphatase-7
5160	PAH,	PDHA1	PDHA|PDHCE1A|PHE1A	X	Xp22.1	pyruvate dehydrogenase (lipoamide) alpha 1	protein-coding	PDHE1-A type I|pyruvate dehydrogenase E1 component subunit alpha, somatic form, mitochondrial|pyruvate dehydrogenase complex, E1-alpha polypeptide 1
406881	PH,	MIRLET7A1	LET7A1|MIRNLET7A1|let-7a-1	9	9q22.32	microRNA let-7a-1	miscRNA	-
842	PAH,	CASP9	APAF-3|APAF3|CASPASE-9c|ICE-LAP6|MCH6|PPP1R56	1	1p36.21	caspase 9, apoptosis-related cysteine peptidase	protein-coding	ICE-like apoptotic protease 6|apoptotic protease MCH-6|apoptotic protease activating factor 3|caspase-9|protein phosphatase 1, regulatory subunit 56
4035	PH,	LRP1	A2MR|APOER|APR|CD91|IGFBP3R|LRP|LRP1A|TGFBR5	12	12q13.3	low density lipoprotein receptor-related protein 1	protein-coding	LRP-1|TbetaR-V/LRP-1/IGFBP-3 receptor|alpha-2-macroglobulin receptor|apolipoprotein E receptor|prolow-density lipoprotein receptor-related protein 1|type V tgf-beta receptor
3294	PAH,	HSD17B2	EDH17B2|HSD17|SDR9C2	16	16q24.1-q24.2	hydroxysteroid (17-beta) dehydrogenase 2	protein-coding	17-beta-HSD 2|17-beta-hydroxysteroid dehydrogenase type 2|20 alpha-hydroxysteroid dehydrogenase|20-alpha-HSD|E2DH|estradiol 17-beta-dehydrogenase 2|microsomal 17-beta-hydroxysteroid dehydrogenase|short chain dehydrogenase/reductase family 9C, member 2|testosterone 17-beta-dehydrogenase
8743	PAH,	TNFSF10	APO2L|Apo-2L|CD253|TL2|TRAIL	3	3q26	tumor necrosis factor (ligand) superfamily, member 10	protein-coding	Apo-2 ligand|TNF-related apoptosis inducing ligand TRAIL|chemokine tumor necrosis factor ligand superfamily member 10|tumor necrosis factor (ligand) family, member 10|tumor necrosis factor apoptosis-inducing ligand splice variant delta|tumor necrosis factor ligand superfamily member 10
406987	PAH,	MIR204	MIRN204|miRNA204	9	9q21.12	microRNA 204	miscRNA	-
406887	PH,	MIRLET7E	MIRNLET7E|hsa-let-7e|let-7e	19	19q13.41	microRNA let-7e	miscRNA	-
10168	PAH,	ZNF197	D3S1363E|P18|VHLaK|ZKSCAN9|ZNF166|ZNF20|ZSCAN41	3	3p21	zinc finger protein 197	protein-coding	VHL-associated KRAB-A domain-containing protein|pVHL-associated KRAB domain-containing protein|zinc finger protein 166|zinc finger protein 20|zinc finger protein with KRAB and SCAN domains 9
51170	PAH,	HSD17B11	17BHSD11|DHRS8|PAN1B|RETSDR2|SDR16C2	4	4q22.1	hydroxysteroid (17-beta) dehydrogenase 11	protein-coding	17-BETA-HSD11|17-BETA-HSDXI|17-beta-HSD 11|17-beta-HSD XI|17-beta-hydroxysteroid dehydrogenase 11|17-beta-hydroxysteroid dehydrogenase XI|17-beta-hydroxysteroid dehydrogenase type XI|CTCL tumor antigen HD-CL-03|CTCL-associated antigen HD-CL-03|T-cell lymphoma-associated antigen HD-CL-03|cutaneous T-cell lymphoma-associated antigen HD-CL-03|dehydrogenase/reductase (SDR family) member 8|dehydrogena…
10059	PAH,	DNM1L	DLP1|DRP1|DVLP|DYMPLE|DYNIV-11|EMPF|HDYNIV|VPS1	12	12p11.21	dynamin 1-like	protein-coding	Dnm1p/Vps1p-like protein|dynamin family member proline-rich carboxyl-terminal domain less|dynamin-1-like protein|dynamin-like protein 4|dynamin-like protein IV|dynamin-related protein 1
3984	PAH,	LIMK1	LIMK|LIMK-1	7	7q11.23	LIM domain kinase 1	protein-coding	LIM motif-containing protein kinase
4134	PAH,	MAP4	-	3	3p21	microtubule-associated protein 4	protein-coding	MAP-4
4879	PAH,	NPPB	BNP	1	1p36.2	natriuretic peptide B	protein-coding	brain type natriuretic peptide|gamma-brain natriuretic peptide|natriuretic peptide precursor B|natriuretic peptides B|natriuretic protein
3065	PAH,	HDAC1	GON-10|HD1|RPD3|RPD3L1	1	1p34	histone deacetylase 1	protein-coding	reduced potassium dependency, yeast homolog-like 1
2150	PH,	F2RL1	GPR11|PAR2	5	5q13	coagulation factor II (thrombin) receptor-like 1	protein-coding	G-protein coupled receptor 11|coagulation factor II receptor-like 1|protease-activated receptor 2|proteinase-activated receptor 2|thrombin receptor-like 1
2006	PH,	ELN	SVAS|WBS|WS	7	7q11.23	elastin	protein-coding	tropoelastin
407009	PH,	MIR224	MIRN224|miRNA224	X	Xq28	microRNA 224	miscRNA	-
6331	PAH,	SCN5A	CDCD2|CMD1E|CMPD2|HB1|HB2|HBBD|HH1|ICCD|IVF|LQT3|Nav1.5|PFHB1|SSS1|VF1	3	3p21	sodium channel, voltage-gated, type V, alpha subunit	protein-coding	cardiac tetrodotoxin-insensitive voltage-dependent sodium channel alpha subunit|sodium channel protein cardiac muscle subunit alpha|sodium channel protein type 5 subunit alpha|voltage-gated sodium channel subunit alpha Nav1.5
400657	PAH,	LOC400657	-	18	18q22.3	uncharacterized LOC400657	miscRNA	-
1908	PAH,	EDN3	ET-3|ET3|HSCR4|PPET3|WS4B	20	20q13.2-q13.3	endothelin 3	protein-coding	endothelin-3|preproendothelin-3
4485	PAH,	MST1	D3F15S2|DNF15S2|HGFL|MSP|NF15S2	3	3p21	macrophage stimulating 1 (hepatocyte growth factor-like)	protein-coding	hepatocyte growth factor-like protein|hepatocyte growth factor-like protein homolog|macrophage-stimulating protein
10666	PAH,	CD226	DNAM-1|DNAM1|PTA1|TLiSA1	18	18q22.3	CD226 molecule	protein-coding	CD226 antigen|DNAX accessory molecule 1|DNAX accessory molecule-1|T lineage-specific activation antigen 1 antigen|adhesion glycoprotein|platelet and T cell activation antigen 1
7057	HPH,	THBS1	THBS|THBS-1|TSP|TSP-1|TSP1	15	15q15	thrombospondin 1	protein-coding	thrombospondin-1|thrombospondin-1p180
135	PAH,	ADORA2A	ADORA2|RDC8|hA2aR	22	22q11.23	adenosine A2a receptor	protein-coding	adenosine A2 receptor|adenosine receptor A2a|adenosine receptor subtype A2a
5592	PH,	PRKG1	1|PKG|PRKG1B|PRKGR1B|cGK|cGK 1|cGK1|cGKI|cGKI-BETA|cGKI-alpha	10	10q11.2	protein kinase, cGMP-dependent, type I	protein-coding	cGMP-dependent protein kinase 1|protein kinase, cGMP-dependent, regulatory, type I, beta
3913	PAH,	LAMB2	LAMS|NPHS5	3	3p21	laminin, beta 2 (laminin S)	protein-coding	S-LAM beta|S-laminin subunit beta|laminin B1s chain|laminin S|laminin subunit beta-2
3952	PAH,	LEP	LEPD|OB|OBS	7	7q31.3	leptin	protein-coding	leptin (murine obesity homolog)|leptin (obesity homolog, mouse)|obese protein|obese, mouse, homolog of|obesity factor
9475	PAH,	ROCK2	ROCK-II	2	2p24	Rho-associated, coiled-coil containing protein kinase 2	protein-coding	p164 ROCK-2|rho-associated protein kinase 2|rho-associated, coiled-coil-containing protein kinase II
406889	PH,	MIRLET7F2	LET7F2|MIRNLET7F2|let-7f-2	X	Xp11.22	microRNA let-7f-2	miscRNA	-
3156	PAH,	HMGCR	LDLCQ3	5	5q13.3-q14	3-hydroxy-3-methylglutaryl-CoA reductase	protein-coding	3-hydroxy-3-methylglutaryl CoA reductase (NADPH)|3-hydroxy-3-methylglutaryl-Coenzyme A reductase|HMG-CoA reductase|hydroxymethylglutaryl-CoA reductase
993	PAH,	CDC25A	CDC25A2	3	3p21	cell division cycle 25A	protein-coding	CDC25A2-CAG isoform|M-phase inducer phosphatase 1|dual specificity phosphatase CDC25A
7923	PAH,	HSD17B8	D6S2245E|FABG|FABGL|H2-KE6|HKE6|KE6|RING2|SDR30C1|dJ1033B10.9	6	6p21.3	hydroxysteroid (17-beta) dehydrogenase 8	protein-coding	17-beta-HSD 8|17-beta-hydroxysteroid dehydrogenase 8|3-oxoacyl-[acyl-carrier-protein] reductase|estradiol 17-beta-dehydrogenase 8|estrogen 17-oxidoreductase|ke-6|protein Ke6|really interesting new gene 2 protein|short chain dehydrogenase/reductase family 30C, member 1|testosterone 17-beta-dehydrogenase 8
406890	PH,	MIRLET7G	LET7G|MIRNLET7G|hsa-let-7g	3	3p21.1	microRNA let-7g	miscRNA	-
6993	PAH,	DYNLT1	CW-1|TCTEL1|tctex-1	6	6q25.2-q25.3	dynein, light chain, Tctex-type 1	protein-coding	T-complex testis-specific protein 1 homolog|dynein light chain Tctex-type 1|t-complex-associated-testis-expressed 1-like 1
8630	PAH,	HSD17B6	HSE|RODH|SDR9C6	12	12q13	hydroxysteroid (17-beta) dehydrogenase 6	protein-coding	17-beta-HSD 6|17-beta-HSD6|17-beta-hydroxysteroid dehydrogenase type 6|3(alpha->beta)-hydroxysteroid epimerase|3(alpha->beta)-hydroxysteroid epimerasel|3-alpha->beta-HSE|3-alpha->beta-hydroxysteroid epimerase|3-hydroxysteroid epimerase|NAD+ -dependent 3 alpha-hydroxysteroid dehydrogenase 3-hydroxysteroid epimerase|hydroxysteroid (17-beta) dehydrogenase 6 homolog|oxidative 3-alpha hydroxysteroid d…
6262	HPH,	RYR2	ARVC2|ARVD2|RYR-2|RyR|VTSIP	1	1q43	ryanodine receptor 2 (cardiac)	protein-coding	cardiac muscle ryanodine receptor-calcium release channel|cardiac-type ryanodine receptor|islet-type ryanodine receptor|kidney-type ryanodine receptor|ryanodine receptor 2|type 2 ryanodine receptor
140623	PAH,	FAUP1	FAU1P|RPS30_2_1613	18	18q22.3	FBR-MuSV-associated ubiquitously expressed (fox derived) pseudogene 1	pseudo	-
7045	PAH,	TGFBI	BIGH3|CDB1|CDG2|CDGG1|CSD|CSD1|CSD2|CSD3|EBMD|LCD1	5	5q31	transforming growth factor, beta-induced, 68kDa	protein-coding	RGD-CAP|RGD-containing collagen-associated protein|beta ig-h3|kerato-epithelin|transforming growth factor-beta-induced protein ig-h3
388	PH,	RHOB	ARH6|ARHB|MST081|MSTP081|RHOH6	2	2p24	ras homolog family member B	protein-coding	Aplysia RAS-related homolog 6|h6|oncogene RHO H6|ras homolog gene family, member B|rho cDNA clone 6|rho-related GTP-binding protein RhoB
10425	PAH,	ARIH2	ARI2|TRIAD1	3	3p21	ariadne homolog 2 (Drosophila)	protein-coding	ARI-2|E3 ubiquitin-protein ligase ARIH2|all-trans retinoic acid inducible RING finger|protein ariadne-2 homolog
3554	PAH,	IL1R1	CD121A|D2S1473|IL-1R-alpha|IL1R|IL1RA|P80	2	2q12	interleukin 1 receptor, type I	protein-coding	CD121 antigen-like family member A|IL-1R-1|IL-1RT-1|IL-1RT1|antigen CD121a|interleukin 1 receptor alpha, type I|interleukin receptor 1|interleukin-1 receptor alpha|interleukin-1 receptor type 1|interleukin-1 receptor type I
56937	PAH,	PMEPA1	STAG1|TMEPAI	20	20q13.31-q13.33	prostate transmembrane protein, androgen induced 1	protein-coding	solid tumor-associated 1 protein|transmembrane prostate androgen-induced protein|transmembrane, prostate androgen induced RNA
2643	PH,	GCH1	DYT14|DYT5|DYT5a|GCH|GTP-CH-1|GTPCH1|HPABH4B	14	14q22.1-q22.2	GTP cyclohydrolase 1	protein-coding	GTP cyclohydrolase I|GTP-CH-I|dystonia 14|guanosine 5'-triphosphate cyclohydrolase I
7450	PH,	VWF	F8VWF|VWD	12	12p13.3	von Willebrand factor	protein-coding	coagulation factor VIII VWF
406884	PH,	MIRLET7B	LET7B|MIRNLET7B|hsa-let-7b|let-7b	22	22q13.31	microRNA let-7b	miscRNA	-
2101	PAH,	ESRRA	ERR1|ERRa|ERRalpha|ESRL1|NR3B1	11	11q13	estrogen-related receptor alpha	protein-coding	ERR-alpha|estrogen receptor-like 1|estrogen-related nuclear receptor alpha|nuclear receptor subfamily 3 group B member 1|steroid hormone receptor ERR1
55748	PAH,	CNDP2	CN2|CPGL|HsT2298|PEPA	18	18q22.3	CNDP dipeptidase 2 (metallopeptidase M20 family)	protein-coding	cytosolic non-specific dipeptidase|cytosolic nonspecific dipeptidase|glutamate carboxypeptidase-like protein 1|peptidase A
125704	PAH,	FAM69C	C18orf51	18	18q22.3	family with sequence similarity 69, member C	protein-coding	protein FAM69C
7498	PAH,	XDH	XO|XOR	2	2p23.1	xanthine dehydrogenase	protein-coding	xanthene dehydrogenase|xanthine dehydrogenase/oxidase|xanthine oxidase|xanthine oxidoreductase
3292	PAH,	HSD17B1	EDH17B2|EDHB17|HSD17|SDR28C1	17	17q11-q21	hydroxysteroid (17-beta) dehydrogenase 1	protein-coding	17-beta-HSD 1|17-beta-hydroxysteroid dehydrogenase type 1|20 alpha-hydroxysteroid dehydrogenase|20-alpha-HSD|E2DH|estradiol 17-beta-dehydrogenase 1|estradiol 17-beta-dehydrogenase-1|hydroxysteroid (17-beta) dehydrogenase 1 isoform|placental 17-beta-hydroxysteroid dehydrogenase|short chain dehydrogenase/reductase family 28CE, member 1
260432	PAH,	SLSN3	-	3	3q22	Senior-Loken syndrome 3	unknown	-
5037	HPH,	PEBP1	HCNP|HCNPpp|PBP|PEBP|PEBP-1|RKIP	12	12q24.23	phosphatidylethanolamine binding protein 1	protein-coding	Raf kinase inhibitory protein|hippocampal cholinergic neurostimulating peptide|neuropolypeptide h3|phosphatidylethanolamine-binding protein 1|prostatic binding protein|prostatic-binding protein|raf kinase inhibitor protein
5166	PAH,	PDK4	-	7	7q21.3	pyruvate dehydrogenase kinase, isozyme 4	protein-coding	[Pyruvate dehydrogenase [lipoamide]] kinase isozyme 4, mitochondrial|pyruvate dehydrogenase kinase, isoenzyme 4|pyruvate dehydrogenase, lipoamide, kinase isozyme 4, mitochondrial
8200	PAH,	GDF5	BDA1C|BMP14|CDMP1|LAP4|OS5|SYNS2	20	20q11.2	growth differentiation factor 5	protein-coding	CDMP-1|GDF-5|cartilage-derived morphogenetic protein-1|growth/differentiation factor 5|radotermin
2355	PAH,	FOSL2	FRA2	2	2p23.3	FOS-like antigen 2	protein-coding	FRA-2|fos-related antigen 2
5566	PAH,	PRKACA	PKACA	19	19p13.1	protein kinase, cAMP-dependent, catalytic, alpha	protein-coding	PKA C-alpha|cAMP-dependent protein kinase catalytic subunit alpha|protein kinase A catalytic subunit
5156	PAH,	PDGFRA	CD140A|PDGFR-2|PDGFR2|RHEPDGFRA	4	4q12	platelet-derived growth factor receptor, alpha polypeptide	protein-coding	CD140 antigen-like family member A|CD140a antigen|PDGF-R-alpha|PDGFR-alpha|PDGFRA/BCR fusion|alpha-type platelet-derived growth factor receptor|platelet-derived growth factor receptor 2|platelet-derived growth factor receptor alpha|rearranged-in-hypereosinophilia-platelet derived growth factor receptor alpha fusion protein
4223	PAH,	MEOX2	GAX|MOX2	7	7p22.1-p21.3	mesenchyme homeobox 2	protein-coding	growth arrest-specific homeobox|homeobox protein MOX-2
240	HPH,	ALOX5	5-LO|5-LOX|5LPG|LOG5	10	10q11.2	arachidonate 5-lipoxygenase	protein-coding	LOX-5|arachidonic 5-lipoxygenase alpha-10 isoform|arachidonic 5-lipoxygenase delta-10-13 isoform|arachidonic 5-lipoxygenase delta-13 isoform|arachidonic 5-lipoxygenase delta-p10 isoform|arachidonic acid 5-lipoxygenase|leukotriene A4 synthase
595	PAH,	CCND1	BCL1|D11S287E|PRAD1|U21B31	11	11q13	cyclin D1	protein-coding	B-cell CLL/lymphoma 1|B-cell lymphoma 1 protein|BCL-1 oncogene|G1/S-specific cyclin-D1|PRAD1 oncogene
494336	PAH,	MIR424	MIR322|MIRN424|hsa-mir-424|miRNA424	X	Xq26.3	microRNA 424	miscRNA	-
3293	PAH,	HSD17B3	EDH17B3|SDR12C2	9	9q22	hydroxysteroid (17-beta) dehydrogenase 3	protein-coding	17-beta-HSD 3|17-beta-HSD3|17-beta-hydroxysteroid dehydrogenase type 3|short chain dehydrogenase/reductase family 12C, member 2|testicular 17-beta-hydroxysteroid dehydrogenase|testosterone 17-beta-dehydrogenase 3
386724	PAH,	AMIGO3	AMIGO-3	3	3p21	adhesion molecule with Ig-like domain 3	protein-coding	alivin-3|amphoterin-induced gene and ORF 3|amphoterin-induced protein 3
406919	PH,	MIR130A	MIRN130A|miRNA130A	11	11q12.1	microRNA 130a	miscRNA	-
1027	PH,	CDKN1B	CDKN4|KIP1|MEN1B|MEN4|P27KIP1	12	12p13.1-p12	cyclin-dependent kinase inhibitor 1B (p27, Kip1)	protein-coding	cyclin-dependent kinase inhibitor 1B
6863	PH,	TAC1	Hs.2563|NK2|NKNA|NPK|TAC2	7	7q21-q22	tachykinin, precursor 1	protein-coding	PPT|neurokinin 1|neurokinin 2|neurokinin A|neurokinin alpha|neuromedin L|neuropeptide K|neuropeptide gamma|preprotachykinin|protachykinin-1|substance K|substance P|tachykinin 2|tachykinin, precursor 1 (substance K, substance P, neurokinin 1, neurokinin 2, neuromedin L, neurokinin alpha, neuropeptide K, neuropeptide gamma)
6348	PH,	CCL3	G0S19-1|LD78ALPHA|MIP-1-alpha|MIP1A|SCYA3	17	17q12	chemokine (C-C motif) ligand 3	protein-coding	C-C motif chemokine 3|G0/G1 switch regulatory protein 19-1|PAT 464.1|SIS-beta|macrophage inflammatory protein 1-alpha|small inducible cytokine A3 (homologous to mouse Mip-1a)|tonsillar lymphocyte LD78 alpha protein
841	PAH,	CASP8	ALPS2B|CAP4|Casp-8|FLICE|MACH|MCH5	2	2q33-q34	caspase 8, apoptosis-related cysteine peptidase	protein-coding	FADD-homologous ICE/CED-3-like protease|FADD-like ICE|ICE-like apoptotic protease 5|MACH-alpha-1/2/3 protein|MACH-beta-1/2/3/4 protein|MORT1-associated ced-3 homolog|apoptotic cysteine protease|apoptotic protease Mch-5|caspase 8, apoptosis-related cysteine protease|caspase-8
1401	PH,	CRP	PTX1	1	1q21-q23	C-reactive protein, pentraxin-related	protein-coding	C-reactive protein|pentraxin 1
1072	PAH,	CFL1	CFL	11	11q13	cofilin 1 (non-muscle)	protein-coding	18 kDa phosphoprotein|cofilin, non-muscle isoform|cofilin-1|p18
1394	PH,	CRHR1	CRF-R|CRF-R-1|CRF-R1|CRF1|CRFR-1|CRFR1|CRH-R-1|CRH-R1|CRH-R1h|CRHR|CRHR1L|CRHR1f	17	17q12-q22	corticotropin releasing hormone receptor 1	protein-coding	corticotropin releasing hormone receptor variant 1e|corticotropin releasing hormone receptor variant 1g|corticotropin-releasing factor receptor 1|corticotropin-releasing factor type 1 receptor|corticotropin-releasing hormone receptor 1|seven transmembrane helix receptor
5163	PAH,	PDK1	-	2	2q31.1	pyruvate dehydrogenase kinase, isozyme 1	protein-coding	PDH kinase 1|mitochondrial pyruvate dehydrogenase, lipoamide, kinase isoenzyme 1|pyruvate dehydrogenase kinase, isoenzyme 1
2454	PAH,	FRA13B	-	13	13q21	fragile site, BrdU type, common, fra(13)(q21)	other	-
6988	PAH,	TCTA	-	3	3p21	T-cell leukemia translocation altered	protein-coding	T-cell leukemia translocation-altered gene protein|T-cell leukemia translocation-associated gene protein
406992	PH,	MIR210	MIRN210|mir-210	11	11p15.5	microRNA 210	miscRNA	-
406888	PH,	MIRLET7F1	LET7F1|MIRNLET7F1|let-7f-1	9	9q22.32	microRNA let-7f-1	miscRNA	-
22813	PAH,	TDGF1P6	CR-6|CRIPTO-6|TDGF6	3	3q22	teratocarcinoma-derived growth factor 1 pseudogene 6	pseudo	-
3627	PAH,	CXCL10	C7|IFI10|INP10|IP-10|SCYB10|crg-2|gIP-10|mob-1	4	4q21	chemokine (C-X-C motif) ligand 10	protein-coding	10 kDa interferon gamma-induced protein|C-X-C motif chemokine 10|gamma IP10|gamma-IP10|interferon-inducible cytokine IP-10|protein 10 from interferon (gamma)-induced cell line|small inducible cytokine subfamily B (Cys-X-Cys), member 10|small-inducible cytokine B10
2983	PAH,	GUCY1B3	GC-S-beta-1|GC-SB3|GUC1B3|GUCB3|GUCSB3|GUCY1B1	4	4q31.3-q33	guanylate cyclase 1, soluble, beta 3	protein-coding	GCS-beta-1|GCS-beta-3|guanylate cyclase soluble subunit beta-1|guanylate cyclase soluble subunit beta-3|soluble guanylate cyclase small subunit
6772	PAH,	STAT1	CANDF7|ISGF-3|STAT91	2	2q32.2	signal transducer and activator of transcription 1, 91kDa	protein-coding	signal transducer and activator of transcription 1-alpha/beta|signal transducer and activator of transcription-1|transcription factor ISGF-3 components p91/p84
147381	PAH,	CBLN2	-	18	18q22.3	cerebellin 2 precursor	protein-coding	cerebellin-2
2779	PAH,	GNAT1	CSNBAD3|GBT1|GNATR	3	3p21	guanine nucleotide binding protein (G protein), alpha transducing activity polypeptide 1	protein-coding	guanine nucleotide-binding protein G(T), alpha-1 subunit|guanine nucleotide-binding protein G(t) subunit alpha-1|rod-type transducin alpha subunit|transducin alpha-1 chain|transducin, rod-specific
688	PAH,	KLF5	BTEB2|CKLF|IKLF	13	13q22.1	Kruppel-like factor 5 (intestinal)	protein-coding	BTE-binding protein 2|GC box binding protein 2|GC-box-binding protein 2|Krueppel-like factor 5|basic transcription element binding protein 2|basic transcription element-binding protein 2|colon krueppel-like factor|colon kruppel-like factor|intestinal-enriched krueppel-like factor|intestinal-enriched kruppel-like factor|transcription factor BTEB2
22926	PAH,	ATF6	ATF6A	1	1q22-q23	activating transcription factor 6	protein-coding	cAMP-dependent transcription factor ATF-6 alpha|cyclic AMP-dependent transcription factor ATF-6 alpha
657	PAH,	BMPR1A	10q23del|ACVRLK3|ALK3|CD292|SKR5	10	10q22.3	bone morphogenetic protein receptor, type IA	protein-coding	ALK-3|BMP type-1A receptor|BMPR-1A|activin A receptor, type II-like kinase 3|activin receptor-like kinase 3|bone morphogenetic protein receptor type-1A|serine/threonine-protein kinase receptor R5
644041	PAH,	C18orf63	DKFZP781G0119	18	18q22.3	chromosome 18 open reading frame 63	protein-coding	uncharacterized protein C18orf63
6915	PAH,	TBXA2R	BDPLT13|TXA2-R	19	19p13.3	thromboxane A2 receptor	protein-coding	prostanoid TP receptor
6715	PAH,	SRD5A1	S5AR 1	5	5p15	steroid-5-alpha-reductase, alpha polypeptide 1 (3-oxo-5 alpha-steroid delta 4-dehydrogenase alpha 1)	protein-coding	3-oxo-5 alpha-steroid delta 4-dehydrogenase alpha 1|3-oxo-5-alpha-steroid 4-dehydrogenase 1|5-alpha reductase|SR type 1|steroid 5-alpha-reductase 1|steroid 5-alpha-reductase type I
442901	HPH,	MIR328	MIRN328|hsa-mir-328	16	16q22.1	microRNA 328	miscRNA	-
1636	PAH,	ACE	ACE1|CD143|DCP|DCP1|ICH|MVCD3	17	17q23.3	angiotensin I converting enzyme (peptidyl-dipeptidase A) 1	protein-coding	CD143 antigen|angiotensin I converting enzyme peptidyl-dipeptidase A 1 transcript|angiotensin converting enzyme, somatic isoform|angiotensin-converting enzyme|carboxycathepsin|dipeptidyl carboxypeptidase 1|dipeptidyl carboxypeptidase I|kininase II|peptidase P|testicular ECA
6315	PAH,	ATXN8OS	KLHL1AS|NCRNA00003|SCA8	13	13q21	ATXN8 opposite strand (non-protein coding)	miscRNA	-
3398	PAH,	ID2	GIG8|ID2A|ID2H|bHLHb26	2	2p25	inhibitor of DNA binding 2, dominant negative helix-loop-helix protein	protein-coding	DNA-binding protein inhibitor ID-2|DNA-binding protein inhibitor ID2|cell growth-inhibiting gene 8|class B basic helix-loop-helix protein 26|helix-loop-helix protein ID2|inhibitor of differentiation 2
57142	PH,	RTN4	ASY|NI220/250|NOGO|NOGO-A|NOGOC|NSP|NSP-CL|Nbla00271|Nbla10545|Nogo-B|Nogo-C|RTN-X|RTN4-A|RTN4-B1|RTN4-B2|RTN4-C	2	2p16.3	reticulon 4	protein-coding	Human NogoA|My043 protein|foocen|neurite growth inhibitor 220|neurite outgrowth inhibitor|neuroendocrine-specific protein C homolog|reticulon 5|reticulon-4
4842	PH,	NOS1	IHPS1|N-NOS|NC-NOS|NOS|bNOS|nNOS	12	12q24.2-q24.31	nitric oxide synthase 1 (neuronal)	protein-coding	NOS type I|constitutive NOS|neuronal NOS|nitric oxide synthase, brain|peptidyl-cysteine S-nitrosylase NOS1
201456	PAH,	FBXO15	FBX15	18	18q22.3	F-box protein 15	protein-coding	F-box only protein 15
8996	PH,	NOL3	ARC|FCM|MYP|NOP|NOP30	16	16q22.1	nucleolar protein 3 (apoptosis repressor with CARD domain)	protein-coding	muscle-enriched cytoplasmic protein|nucleolar protein 3|nucleolar protein of 30 kDa
6714	PAH,	SRC	ASV|SRC1|c-SRC|p60-Src	20	20q12-q13	v-src sarcoma (Schmidt-Ruppin A-2) viral oncogene homolog (avian)	protein-coding	proto-oncogene c-Src|proto-oncogene tyrosine-protein kinase Src|protooncogene SRC, Rous sarcoma|tyrosine kinase pp60c-src|tyrosine-protein kinase SRC-1
3115	PAH,	HLA-DPB1	DPB1|HLA-DP|HLA-DP1B|HLA-DPB	6	6p21.3	major histocompatibility complex, class II, DP beta 1	protein-coding	HLA DP14-beta chain|HLA class II histocompatibility antigen, DP beta 1 chain|HLA class II histocompatibility antigen, DP(W4) beta chain|HLA-DP histocompatibility type, beta-1 subunit|MHC HLA DPB1|MHC class II HLA-DP-beta|MHC class II HLA-DP-beta-1|MHC class II HLA-DRB1|MHC class II antigen DP beta 1 chain|MHC class II antigen DPB1|MHC class II antigen DPbeta1|MHC class II antigen beta chain|beta1…
3383	PAH,	ICAM1	BB2|CD54|P3.58	19	19p13.3-p13.2	intercellular adhesion molecule 1	protein-coding	ICAM-1|cell surface glycoprotein P3.58|intercellular adhesion molecule 1 (CD54), human rhinovirus receptor|major group rhinovirus receptor
8600	PAH,	TNFSF11	CD254|ODF|OPGL|OPTB2|RANKL|TRANCE|hRANKL2|sOdf	13	13q14	tumor necrosis factor (ligand) superfamily, member 11	protein-coding	TNF-related activation-induced cytokine|osteoclast differentiation factor|osteoprotegerin ligand|receptor activator of nuclear factor kappa B ligand|receptor activator of nuclear factor kappa-B ligand|tumor necrosis factor ligand superfamily member 11
51188	PAH,	SS18L2	KIAA-iso	3	3p21	synovial sarcoma translocation gene on chromosome 18-like 2	protein-coding	SS18-like protein 2|SYT homolog 2
57060	PAH,	PCBP4	CBP|LIP4|MCG10	3	3p21	poly(rC) binding protein 4	protein-coding	LYST-interacting protein|RNA binding protein MCG10|alpha-CP4|poly(rC)-binding protein 4
10194	PAH,	TSHZ1	CAA|NY-CO-33|SDCCAG33|TSH1	18	18q22.3	teashirt zinc finger homeobox 1	protein-coding	antigen NY-CO-33|serologically defined colon cancer antigen 33|teashirt homolog 1
4851	PAH,	NOTCH1	TAN1|hN1	9	9q34.3	notch 1	protein-coding	Notch homolog 1, translocation-associated|neurogenic locus notch homolog protein 1|translocation-associated notch protein TAN-1
8862	HPH,	APLN	APEL|XNPEP2	X	Xq25	apelin	protein-coding	AGTRL1 ligand|APJ endogenous ligand
57626	PAH,	KLHL1	MRP2	13	13q21	kelch-like family member 1	protein-coding	Mayven-related protein 2|kelch-like protein 1
100505876	PAH,	LOC100505876	-	2	2p22	uncharacterized LOC100505876	miscRNA	-
85507	PAH,	DFNA18	-	3	3q22	deafness, autosomal dominant 18	unknown	-
2977	PH,	GUCY1A2	GC-SA2|GUC1A2	11	11q21-q22	guanylate cyclase 1, soluble, alpha 2	protein-coding	GCS-alpha-2|guanylate cyclase soluble subunit alpha-2
100188871	PAH,	CELIAC9	-	3	3p21	Celiac disease, susceptibility to, 9	unknown	-
1073	PAH,	CFL2	NEM7	14	14q12	cofilin 2 (muscle)	protein-coding	cofilin, muscle isoform|cofilin-2|nemaline myopathy type 7
406885	PH,	MIRLET7C	LET7C|MIRNLET7C|hsa-let-7c|let-7c	21	21q21.1	microRNA let-7c	miscRNA	-
51554	PAH,	CCRL1	CC-CKR-11|CCBP2|CCR-11|CCR10|CCR11|CCX CKR|CCX-CKR|CKR-11|PPR1|VSHK1	3	3q22	chemokine (C-C motif) receptor-like 1	protein-coding	C-C CKR-11|C-C chemokine receptor type 11|CC chemokine receptor-like 1|chemocentryx chemokine receptor|chemokine, cc motif, receptor-like protein 1|orphan seven-transmembrane receptor, chemokine related
3569	PAH,	IL6	BSF2|HGF|HSF|IFNB2|IL-6	7	7p21	interleukin 6 (interferon, beta 2)	protein-coding	B-cell differentiation factor|B-cell stimulatory factor 2|BSF-2|CDF|CTL differentiation factor|IFN-beta-2|hybridoma growth factor|interferon beta-2|interleukin BSF-2|interleukin-6
7494	PAH,	XBP1	TREB5|XBP-1|XBP2	22	22q12.1|22q12	X-box binding protein 1	protein-coding	X-box-binding protein 1|tax-responsive element-binding protein 5
6259	PAH,	RYK	D3S3195|JTK5|JTK5A|RYK1	3	3q22	receptor-like tyrosine kinase	protein-coding	JTK5A protein tyrosine kinase|hydroxyaryl-protein kinase|tyrosine-protein kinase RYK
2852	PAH,	GPER	CEPR|CMKRL2|DRY12|FEG-1|GPCR-Br|GPR30|LERGU|LERGU2|LyGPR	7	7p22.3	G protein-coupled estrogen receptor 1	protein-coding	G protein-coupled receptor 30|G-protein coupled estrogen receptor 1|G-protein coupled receptor 30|IL8-related receptor DRY12|chemoattractant receptor-like 2|chemokine receptor-like 2|constitutively expressed peptide-like receptor|flow-induced endothelial G-protein coupled receptor 1|heptahelix receptor|leucine rich protein in GPR30 3'UTR|lymphocyte-derived G-protein coupled receptor|mER|membrane …
59272	PAH,	ACE2	ACEH	X	Xp22	angiotensin I converting enzyme (peptidyl-dipeptidase A) 2	protein-coding	ACE-related carboxypeptidase|angiotensin I converting enzyme 2|angiotensin-converting enzyme 2|angiotensin-converting enzyme homolog|metalloprotease MPROT15
100132647	PAH,	LOC100132647	-	18	18q22.3	signal peptide peptidase like 3 pseudogene	pseudo	-
3552	PAH,	IL1A	IL-1A|IL1|IL1-ALPHA|IL1F1	2	2q14	interleukin 1, alpha	protein-coding	IL-1 alpha|hematopoietin-1|interleukin-1 alpha|preinterleukin 1 alpha|pro-interleukin-1-alpha
5155	PAH,	PDGFB	PDGF-2|PDGF2|SIS|SSV|c-sis	22	22q13.1	platelet-derived growth factor beta polypeptide	protein-coding	PDGF subunit B|PDGF, B chain|becaplermin|platelet-derived growth factor 2|platelet-derived growth factor B chain|platelet-derived growth factor beta polypeptide (simian sarcoma viral (v-sis) oncogene homolog)|platelet-derived growth factor subunit B|platelet-derived growth factor, beta polypeptide (oncogene SIS)|proto-oncogene c-Sis
10746	PH,	MAP3K2	MEKK2|MEKK2B	2	2q14.3	mitogen-activated protein kinase kinase kinase 2	protein-coding	MAP/ERK kinase kinase 2|MAPK/ERK kinase kinase 2|MEK kinase 2|MEKK 2
5136	PAH,	PDE1A	CAM-PDE-1A|HCAM-1|HCAM1|HSPDE1A	2	2q32.1	phosphodiesterase 1A, calmodulin-dependent	protein-coding	61 kDa Cam-PDE|calcium/calmodulin-dependent 3',5'-cyclic nucleotide phosphodiesterase 1A|calcium/calmodulin-stimulated cyclic nucleotide phosphodiesterase|cam-PDE 1A
1499	PAH,	CTNNB1	CTNNB|MRD19|armadillo	3	3p21	catenin (cadherin-associated protein), beta 1, 88kDa	protein-coding	catenin beta-1
8742	PAH,	TNFSF12	APO3L|DR3LG|TWEAK	17	17p13	tumor necrosis factor (ligand) superfamily, member 12	protein-coding	APO3 ligand|APO3/DR3 ligand|TNF-related WEAK inducer of apoptosis|tumor necrosis factor ligand superfamily member 12
3119	PAH,	HLA-DQB1	CELIAC1|HLA-DQB|IDDM1	6	6p21.3	major histocompatibility complex, class II, DQ beta 1	protein-coding	HLA class II histocompatibility antigen, DQ beta 1 chain|MHC DQ beta|MHC class II DQ beta chain|MHC class II HLA-DQ beta glycoprotein|MHC class II antigen DQB1|MHC class II antigen HLA-DQ-beta-1|MHC class2 antigen|lymphocyte antigen
51517	PAH,	NCKIPSD	AF3P21|DIP|DIP1|ORF1|SPIN90|WASLBP|WISH	3	3p21	NCK interacting protein with SH3 domain	protein-coding	54 kDa VacA-interacting protein|54 kDa vimentin-interacting protein|90 kDa SH3 protein interacting with Nck|DIP-1|NCK-interacting protein with SH3 domain|SH3 adapter protein SPIN90|SH3 protein interacting with Nck, 90 kDa|VIP54|WASP-interacting SH3-domain protein|dia interacting protein|dia-interacting protein 1|diaphanous protein interacting protein|diaphanous protein-interacting protein|wiskott…
5159	PAH,	PDGFRB	CD140B|IBGC4|JTK12|PDGFR|PDGFR-1|PDGFR1	5	5q33.1	platelet-derived growth factor receptor, beta polypeptide	protein-coding	CD140 antigen-like family member B|PDGF-R-beta|PDGFR-beta|beta-type platelet-derived growth factor receptor|platelet-derived growth factor receptor 1|platelet-derived growth factor receptor beta
1545	PAH,	CYP1B1	CP1B|CYPIB1|GLC3A|P4501B1	2	2p22.2	cytochrome P450, family 1, subfamily B, polypeptide 1	protein-coding	aryl hydrocarbon hydroxylase|cytochrome P450 1B1|cytochrome P450, subfamily I (dioxin-inducible), polypeptide 1 (glaucoma 3, primary infantile)|flavoprotein-linked monooxygenase|microsomal monooxygenase|xenobiotic monooxygenase
718	PH,	C3	AHUS5|ARMD9|ASP|C3a|C3b|CPAMD1	19	19p13.3-p13.2	complement component 3	protein-coding	C3 and PZP-like alpha-2-macroglobulin domain-containing protein 1|C3a anaphylatoxin|acylation-stimulating protein cleavage product|complement C3|complement component C3|complement component C3a|complement component C3b|prepro-C3
468	PAH,	ATF4	CREB-2|CREB2|TAXREB67|TXREB	22	22q13.1	activating transcription factor 4 (tax-responsive enhancer element B67)	protein-coding	DNA-binding protein TAXREB67|cAMP response element-binding protein 2|cAMP-dependent transcription factor ATF-4|cAMP-responsive element-binding protein 2|cyclic AMP-dependent transcription factor ATF-4|cyclic AMP-responsive element-binding protein 2|tax-responsive enhancer element-binding protein 67
3309	PAH,	HSPA5	BIP|GRP78|MIF2	9	9q33.3	heat shock 70kDa protein 5 (glucose-regulated protein, 78kDa)	protein-coding	78 kDa glucose-regulated protein|endoplasmic reticulum lumenal Ca(2+)-binding protein grp78|immunoglobulin heavy chain-binding protein
134549	PAH,	SHROOM1	APXL2	5	5q31.1	shroom family member 1	protein-coding	apical protein 2|protein Shroom1
55193	PAH,	PBRM1	BAF180|PB1	3	3p21	polybromo 1	protein-coding	BRG1-associated factor 180|polybromo-1D|protein polybromo-1
51099	PAH,	ABHD5	CDS|CGI58|IECN2|NCIE2	3	3p21	abhydrolase domain containing 5	protein-coding	1-acylglycerol-3-phosphate O-acyltransferase ABHD5|abhydrolase domain-containing protein 5|lipid droplet-binding protein CGI-58
1535	PAH,	CYBA	p22-PHOX	16	16q24	cytochrome b-245, alpha polypeptide	protein-coding	cytochrome b light chain|cytochrome b(558) alpha chain|cytochrome b(558) alpha-subunit|cytochrome b, alpha polypeptide|cytochrome b-245 light chain|cytochrome b558 subunit alpha|flavocytochrome b-558 alpha polypeptide|neutrophil cytochrome b 22 kDa polypeptide|p22 phagocyte B-cytochrome|p22phox|superoxide-generating NADPH oxidase light chain subunit
4314	PAH,	MMP3	CHDS6|MMP-3|SL-1|STMY|STMY1|STR1	11	11q22.3	matrix metallopeptidase 3 (stromelysin 1, progelatinase)	protein-coding	matrix metalloproteinase 3 (stromelysin 1, progelatinase)|matrix metalloproteinase-3|proteoglycanase|stromelysin-1|transin-1
7412	PAH,	VCAM1	CD106|INCAM-100	1	1p32-p31	vascular cell adhesion molecule 1	protein-coding	CD106 antigen|vascular cell adhesion protein 1
7292	PH,	TNFSF4	CD134L|CD252|GP34|OX-40L|OX4OL|TXGP1	1	1q25	tumor necrosis factor (ligand) superfamily, member 4	protein-coding	CD134 ligand|OX40 antigen ligand|OX40L|TAX transcriptionally-activated glycoprotein 1|glycoprotein Gp34|tax-transcriptionally activated glycoprotein 1 (34kD)|tumor necrosis factor ligand superfamily member 4
10891	PAH,	PPARGC1A	LEM6|PGC-1(alpha)|PGC-1v|PGC1|PGC1A|PPARGC1	4	4p15.1	peroxisome proliferator-activated receptor gamma, coactivator 1 alpha	protein-coding	L-PGC-1alpha|PGC-1-alpha|PPAR gamma coactivator variant form|PPARGC-1-alpha|ligand effect modulator-6|peroxisome proliferator-activated receptor gamma coactivator 1 alpha transcript variant B4|peroxisome proliferator-activated receptor gamma coactivator 1 alpha transcript variant B4-3ext|peroxisome proliferator-activated receptor gamma coactivator 1 alpha transcript variant B4-8a|peroxisome proli…
3127	PAH,	HLA-DRB5	HLA-DRB	6	6p21.3	major histocompatibility complex, class II, DR beta 5	protein-coding	DR beta-5|DR-9|DR2-beta-2|DR9|HLA class II histocompatibility antigen, DR beta 5 chain|HLA class II histocompatibility antigen, DR-5 beta chain|HLA class II histocompatibility antigen, DRB1-9 beta chain|MHC HLA-DR-beta cell surface glycoprotein|MHC HLA-DR-beta chain|MHC class II HLA beta chain|MHC class II antigen DRB1*9|MHC class II antigen DRB5|dw2|human leucocyte antigen DRB5|leukocyte antigen…
3598	PAH,	IL13RA2	CD213A2|CT19|IL-13R|IL13BP	X	Xq13.1-q28	interleukin 13 receptor, alpha 2	protein-coding	IL-13 receptor subunit alpha-2|IL-13R subunit alpha-2|IL-13R-alpha-2|IL-13RA2|cancer/testis antigen 19|interleukin 13 binding protein|interleukin 13 receptor alpha 2 chain|interleukin-13 receptor subunit alpha-2|interleukin-13-binding protein
7433	PAH,	VIPR1	HVR1|II|PACAP-R-2|PACAP-R2|RDC1|V1RG|VAPC1|VIP-R-1|VIPR|VIRG|VPAC1|VPAC1R|VPCAP1R	3	3p22	vasoactive intestinal peptide receptor 1	protein-coding	PACAP type II receptor|VIP and PACAP receptor 1|VIP receptor, type I|pituitary adenylate cyclase activating polypeptide receptor, type II|vasoactive intestinal polypeptide receptor 1
2335	PH,	FN1	CIG|ED-B|FINC|FN|FNZ|GFND|GFND2|LETS|MSF	2	2q34	fibronectin 1	protein-coding	cold-insoluble globulin|fibronectin|migration-stimulating factor
3028	PAH,	HSD17B10	17b-HSD10|ABAD|CAMR|DUPXp11.22|ERAB|HADH2|HCD2|MHBD|MRPP2|MRX17|MRX31|MRXS10|SCHAD|SDR5C1	X	Xp11.2	hydroxysteroid (17-beta) dehydrogenase 10	protein-coding	3-hydroxy-2-methylbutyryl-CoA dehydrogenase|3-hydroxyacyl-CoA dehydrogenase type-2|AB-binding alcohol dehydrogenase|amyloid-beta peptide binding alcohol dehydrogenase|endoplasmic reticulum-associated amyloid beta-peptide-binding protein|mitochondrial RNase P subunit 2|mitochondrial ribonuclease P protein 2|short chain L-3-hydroxyacyl-CoA dehydrogenase type 2|short chain dehydrogenase/reductase fa…
4092	PH,	SMAD7	CRCS3|MADH7|MADH8	18	18q21.1	SMAD family member 7	protein-coding	MAD (mothers against decapentaplegic, Drosophila) homolog 7|MAD homolog 8|Mothers against decapentaplegic, drosophila, homolog of, 7|SMAD, mothers against DPP homolog 7|hSMAD7|mothers against DPP homolog 8|mothers against decapentaplegic homolog 7
3337	PAH,	DNAJB1	HSPF1|Hdj1|Hsp40|RSPH16B|Sis1	19	19p13.2	DnaJ (Hsp40) homolog, subfamily B, member 1	protein-coding	DnaJ (Hsp40) homolog, subfmaily B, member 1|dnaJ homolog subfamily B member 1|dnaJ protein homolog 1|hDj-1|heat shock 40 kDa protein 1|heat shock 40kD protein 1|heat shock protein 40|human DnaJ protein 1|radial spoke 16 homolog B
400655	PAH,	LOC400655	-	18	18q22.3	uncharacterized LOC400655	miscRNA	-
10663	PAH,	CXCR6	BONZO|CD186|STRL33|TYMSTR	3	3p21	chemokine (C-X-C motif) receptor 6	protein-coding	C-X-C chemokine receptor type 6|CDw186|CXC-R6|CXCR-6|G protein-coupled receptor|G-protein coupled receptor STRL33|G-protein coupled receptor bonzo
60500	PAH,	BRCA3	BRCAX	13	13q21	breast cancer 3	unknown	-
55107	PH,	ANO1	DOG1|ORAOV2|TAOS2|TMEM16A	11	11q13.3	anoctamin 1, calcium activated chloride channel	protein-coding	anoctamin-1|discovered on gastrointestinal stromal tumors protein 1|oral cancer overexpressed 2|transmembrane protein 16A (eight membrane-spanning domains)|tumor-amplified and overexpressed sequence 2
6696	PAH,	SPP1	BNSP|BSPI|ETA-1|OPN	4	4q22.1	secreted phosphoprotein 1	protein-coding	SPP1/CALPHA1 fusion|early T-lymphocyte activation 1|nephropontin|osteopontin|osteopontin/immunoglobulin alpha 1 heavy chain constant region fusion protein|secreted phosphoprotein 1 (osteopontin, bone sialoprotein I, early T-lymphocyte activation 1)|urinary stone protein|uropontin
3480	PH,	IGF1R	CD221|IGFIR|IGFR|JTK13	15	15q26.3	insulin-like growth factor 1 receptor	protein-coding	IGF-I receptor|insulin-like growth factor I receptor|soluble IGF1R variant 1|soluble IGF1R variant 2
7318	PAH,	UBA7	D8|UBA1B|UBE1L|UBE2	3	3p21	ubiquitin-like modifier activating enzyme 7	protein-coding	UBA1, ubiquitin-activating enzyme E1 homolog B|UBA7, ubiquitin-activating enzyme E1|ubiquitin-activating enzyme 7|ubiquitin-activating enzyme E1 homolog|ubiquitin-activating enzyme E1-related protein|ubiquitin-activating enzyme-2|ubiquitin-like modifier-activating enzyme 7
5292	PAH,	PIM1	PIM	6	6p21.2	pim-1 oncogene	protein-coding	Oncogene PIM1|pim-1 kinase 44 kDa isoform|pim-1 oncogene (proviral integration site 1)|proto-oncogene serine/threonine-protein kinase pim-1|serine/threonine-protein kinase pim-1
30819	PH,	KCNIP2	KCHIP2	10	10q24	Kv channel interacting protein 2	protein-coding	A-type potassium channel modulatory protein 2|Kv channel-interacting protein 2|cardiac voltage-gated potassium channel modulatory subunit|potassium channel-interacting protein 2
5551	PH,	PRF1	FLH2|HPLH2|P1|PFN1|PFP	10	10q22	perforin 1 (pore forming protein)	protein-coding	cytolysin|lymphocyte pore forming protein|lymphocyte pore-forming protein|perforin-1
187	HPH,	APLNR	AGTRL1|APJ|APJR|HG11	11	11q12	apelin receptor	protein-coding	APJ (apelin) receptor|APJ receptor|G protein-coupled receptor APJ|G-protein coupled receptor APJ|G-protein coupled receptor HG11|HG11 orphan receptor|angiotensin II receptor-like 1|angiotensin receptor-like 1
50507	PAH,	NOX4	KOX|KOX-1|RENOX	11	11q14.2-q21	NADPH oxidase 4	protein-coding	kidney oxidase-1|kidney superoxide-producing NADPH oxidase|renal NAD(P)H-oxidase
51171	PAH,	HSD17B14	DHRS10|SDR47C1|retSDR3	19	19q13.33	hydroxysteroid (17-beta) dehydrogenase 14	protein-coding	17-beta-HSD 14|17-beta-hydroxysteroid dehydrogenase 14|17-beta-hydroxysteroid dehydrogenase DHRS10|dehydrogenase/reductase (SDR family) member 10|dehydrogenase/reductase SDR family member 10|retinal short-chain dehydrogenase/reductase 3|retinal short-chain dehydrogenase/reductase retSDR3|short chain dehydrogenase/reductase family 47C, member 1
7471	PAH,	WNT1	INT1	12	12q13	wingless-type MMTV integration site family, member 1	protein-coding	proto-oncogene Int-1 homolog|proto-oncogene Wnt-1|wingless-type MMTV integration site family, member 1 (oncogene INT1)
26585	HPH,	GREM1	CKTSF1B1|DAND2|DRM|GREMLIN|IHG-2	15	15q13.3	gremlin 1, DAN family BMP antagonist	protein-coding	DAN domain family member 2|cell proliferation-inducing gene 2 protein|cysteine knot superfamily 1, BMP antagonist 1|down-regulated in Mos-transformed cells protein|gremlin 1, cysteine knot superfamily, homolog|gremlin 1-like protein|gremlin-1|increased in high glucose protein 2|increased in high glucose-2|proliferation-inducing gene 2
5617	PH,	PRL	-	6	6p22.2-p21.3	prolactin	protein-coding	decidual prolactin
10201	PAH,	NME6	IPIA-ALPHA|NDK 6|NM23-H6	3	3p21	NME/NM23 nucleoside diphosphate kinase 6	protein-coding	NDP kinase 6|inhibitor of p53-induced apoptosis-alpha|non-metastatic cells 6, protein expressed in (nucleoside-diphosphate kinase)|nucleoside diphosphate kinase 6
100861563	PAH,	SCAANT1	ATXN7-AS1	3	3p21	SCA7/ATXN7 antisense RNA 1	miscRNA	-
724066	PAH,	ATXN8	ATXN3	13	13q21	ataxin 8	protein-coding	ataxin-8|protein 1C2
9068	PH,	ANGPTL1	ANG3|ANGPT3|ARP1|AngY|UNQ162|dJ595C2.2	1	1q25.2	angiopoietin-like 1	protein-coding	ANG-3|angioarrestin|angiopoietin 3|angiopoietin Y1|angiopoietin-3|angiopoietin-like protein 1|angiopoietin-related protein 1|dJ595C2.2 (angiopoietin Y1)
59341	HPH,	TRPV4	CMT2C|HMSN2C|OTRPC4|SMAL|SPSMA|SSQTL1|TRP12|VRL2|VROAC	12	12q24.1	transient receptor potential cation channel, subfamily V, member 4	protein-coding	OSM9-like transient receptor potential channel 4|osm-9-like TRP channel 4|osmosensitive transient receptor potential channel 4|transient receptor potential cation channel subfamily V member 4|transient receptor potential protein 12|vanilloid receptor-like channel 2|vanilloid receptor-related osmotically activated channel
3295	PAH,	HSD17B4	DBP|MFE-2|MPF-2|PRLTS1|SDR8C1	5	5q21	hydroxysteroid (17-beta) dehydrogenase 4	protein-coding	17-beta-HSD 4|17-beta-HSD IV|17-beta-hydroxysteroid dehydrogenase 4|17beta-estradiol dehydrogenase type IV|3-alpha,7-alpha,12-alpha-trihydroxy-5-beta-cholest-24-enoyl-CoA hydratase|D-3-hydroxyacyl-CoA dehydratase|D-bifunctional protein, peroxisomal|beta-hydroxyacyl dehydrogenase|beta-keto-reductase|multifunctional protein 2|peroxisomal multifunctional enzyme type 2|peroxisomal multifunctional pro…
5165	PAH,	PDK3	-	X	Xp22.11	pyruvate dehydrogenase kinase, isozyme 3	protein-coding	pyruvate dehydrogenase kinase, isoenzyme 3|pyruvate dehydrogenase, lipoamide, kinase isozyme 3, mitochondrial
2100	PAH,	ESR2	ER-BETA|ESR-BETA|ESRB|ESTRB|Erb|NR3A2	14	14q23.2	estrogen receptor 2 (ER beta)	protein-coding	estrogen nuclear receptor beta variant a|estrogen nuclear receptor beta variant b|estrogen receptor beta|estrogen receptor beta 4|nuclear receptor subfamily 3 group A member 2
100653366	PAH,	PSC	-	3	3p21	Cholangitis, primary sclerosing	unknown	-
100301990	PAH,	LOC100301990	-	3	3p21	zinc finger protein 610 pseudogene	pseudo	-
8412	PAH,	BCAR3	NSP2|SH2D3B	1	1p22.1	breast cancer anti-estrogen resistance 3	protein-coding	SH2 domain-containing protein 3B|breast cancer anti-estrogen resistance protein 3|breast cancer antiestrogen resistance 3 protein|dJ1033H22.2 (breast cancer anti-estrogen resistance 3)|novel SH2-containing protein 2
2103	PAH,	ESRRB	DFNB35|ERR2|ERRb|ESRL2|NR3B2	14	14q24.3	estrogen-related receptor beta	protein-coding	ERR beta-2|ERR-beta|ERRbeta-2|estrogen receptor-like 2|estrogen-related nuclear receptor beta|nuclear receptor ERRB2|nuclear receptor subfamily 3 group B member 2|orphan nuclear receptor|steroid hormone receptor ERR2
406882	PH,	MIRLET7A2	LET7A2|MIRNLET7A2|let-7a-2	11	11q24.1	microRNA let-7a-2	miscRNA	-
407032	PH,	MIR30C2	MIRN30C2	6	6q13	microRNA 30c-2	miscRNA	-
961	PH,	CD47	IAP|MER6|OA3	3	3q13.1-q13.2	CD47 molecule	protein-coding	CD47 antigen (Rh-related antigen, integrin-associated signal transducer)|CD47 glycoprotein|Rh-related antigen|antigen identified by monoclonal antibody 1D8|antigenic surface determinant protein OA3|integrin associated protein|integrin-associated protein|integrin-associated signal transducer|leukocyte surface antigen CD47
100529111	PAH,	LOC100529111	-	2	2p22	N-acetylneuraminate pyruvate lyase (dihydrodipicolinate synthase) pseudogene	pseudo	-
574506	PAH,	MIR503	MIRN503|hsa-mir-503	X	Xq26.3	microRNA 503	miscRNA	-
3099	PAH,	HK2	HKII|HXK2	2	2p13	hexokinase 2	protein-coding	HK II|hexokinase type II|hexokinase-2|hexokinase-2, muscle|muscle form hexokinase
100421865	PAH,	EEF1A1P3	EEF1AL|EEF1AL1	13	13q21	eukaryotic translation elongation factor 1 alpha 1 pseudogene 3	pseudo	-
2837	PH,	UTS2R	GPR14|UR-2-R|UTR|UTR2	17	17q25.3	urotensin 2 receptor	protein-coding	G protein-coupled receptor 14|G-protein coupled receptor 14|UR-II-R|urotensin II receptor|urotensin-2 receptor
338091	PAH,	PSMD10P3	-	13	13q21	proteasome 26S subunit, non-ATPase, 10 pseudogene 3	pseudo	-
7223	PAH,	TRPC4	HTRP-4|HTRP4|TRP4	13	13q13.3	transient receptor potential cation channel, subfamily C, member 4	protein-coding	short transient receptor potential channel 4|trp-related protein 4
1661	PAH,	DHX9P1	DDX9P|DHX9P	13	13q21	DEAH (Asp-Glu-Ala-His) box polypeptide 9 pseudogene 1	pseudo	-
407019	PH,	MIR27B	MIR-27b|MIRN27B|miRNA27B	9	9q22.32	microRNA 27b	miscRNA	-
6462	PAH,	SHBG	ABP|SBP|TEBG	17	17p13-p12	sex hormone-binding globulin	protein-coding	sex steroid-binding protein|testis-specific androgen-binding protein|testosterone-binding beta-globulin|testosterone-estradiol-binding globulin|testosterone-estrogen-binding globulin
27302	PH,	BMP10	-	2	2p13.3	bone morphogenetic protein 10	protein-coding	-
7157	HPH,	TP53	BCC7|LFS1|P53|TRP53	17	17p13.1	tumor protein p53	protein-coding	antigen NY-CO-13|cellular tumor antigen p53|p53 tumor suppressor|phosphoprotein p53|transformation-related protein 53
6648	PAH,	SOD2	IPOB|MNSOD|MVCD6	6	6q25.3	superoxide dismutase 2, mitochondrial	protein-coding	Mn superoxide dismutase|indophenoloxidase B|manganese-containing superoxide dismutase|mangano-superoxide dismutase|superoxide dismutase [Mn], mitochondrial
5137	PAH,	PDE1C	Hcam3	7	7p14.3	phosphodiesterase 1C, calmodulin-dependent 70kDa	protein-coding	Human 3',5' cyclic nucleotide phosphodiesterase (HSPDE1C1A)|calcium/calmodulin-dependent 3',5'-cyclic nucleotide phosphodiesterase 1C|cam-PDE 1C|hCam-3
5460	PAH,	POU5F1	OCT3|OCT4|OTF-3|OTF3|OTF4|Oct-3|Oct-4	6	6p21.31	POU class 5 homeobox 1	protein-coding	POU domain transcription factor OCT4|POU domain, class 5, transcription factor 1|POU-type homeodomain-containing DNA-binding protein|octamer-binding protein 3|octamer-binding protein 4|octamer-binding transcription factor 3|octamer-binding transcription factor-3
284273	PAH,	ZADH2	-	18	18q22.3	zinc binding alcohol dehydrogenase domain containing 2	protein-coding	zinc-binding alcohol dehydrogenase domain-containing protein 2
780906	PAH,	SLI3	-	13	13q21	Specific language impairment QTL, 3	unknown	-
7474	PAH,	WNT5A	hWNT5A	3	3p21-p14	wingless-type MMTV integration site family, member 5A	protein-coding	WNT-5A protein|protein Wnt-5a
64881	PAH,	PCDH20	PCDH13	13	13q21	protocadherin 20	protein-coding	protocadherin 13|protocadherin-13|protocadherin-20
5154	PAH,	PDGFA	PDGF-A|PDGF1	7	7p22	platelet-derived growth factor alpha polypeptide	protein-coding	PDGF A-chain|PDGF subunit A|PDGF-1|platelet-derived growth factor A chain|platelet-derived growth factor alpha chain|platelet-derived growth factor alpha isoform 2 preproprotein|platelet-derived growth factor subunit A
5164	PAH,	PDK2	PDHK2|PDKII	17	17q21.33	pyruvate dehydrogenase kinase, isozyme 2	protein-coding	PDH kinase 2|pyruvate dehydrogenase kinase, isoenzyme 2|pyruvate dehydrogenase, lipoamide, kinase isozyme 2, mitochondrial
1889	PH,	ECE1	ECE	1	1p36.1	endothelin converting enzyme 1	protein-coding	ECE-1|endothelin-converting enzyme 1
4791	PH,	NFKB2	H2TF1|LYT-10|LYT10|NF-kB2|p105|p52	10	10q24	nuclear factor of kappa light polypeptide gene enhancer in B-cells 2 (p49/p100)	protein-coding	DNA-binding factor KBF2|lymphocyte translocation chromosome 10 protein|nuclear factor NF-kappa-B p100 subunit|nuclear factor of kappa light chain gene enhancer in B-cells 2|oncogene Lyt-10
9166	PAH,	EBAG9	EB9|PDAF|RCAS1	8	8q23	estrogen receptor binding site associated, antigen, 9	protein-coding	cancer associated surface antigen|cancer-associated surface antigen RCAS1|estrogen receptor-binding fragment-associated gene 9 protein|receptor-binding cancer antigen expressed on SiSo cells
1491	PH,	CTH	-	1	1p31.1	cystathionase (cystathionine gamma-lyase)	protein-coding	cystathionine gamma-lyase|cysteine desulfhydrase|cysteine-protein sulfhydrase|gamma-cystathionase|homoserine deaminase|homoserine dehydratase
6159	PAH,	RPL29	HIP|HUMRPL29|L29|RPL29P10|RPL29_3_370	3	3p21.3-p21.2	ribosomal protein L29	protein-coding	60S ribosomal protein L29|HP/HS-interacting protein|cell surface heparin-binding protein HIP|heparin/heparan sulfate-binding protein|heparin/heparan sulfate-interacting protein|ribosomal protein YL43 homologue
100271310	PAH,	RPL35AP8	RPL35A_1_367	3	3p21	ribosomal protein L35a pseudogene 8	pseudo	-
207	PAH,	AKT1	AKT|CWS6|PKB|PKB-ALPHA|PRKBA|RAC|RAC-ALPHA	14	14q32.32	v-akt murine thymoma viral oncogene homolog 1	protein-coding	PKB alpha|RAC-PK-alpha|RAC-alpha serine/threonine-protein kinase|protein kinase B alpha|proto-oncogene c-Akt|rac protein kinase alpha
406952	PAH,	MIR17	MIR17-5p|MIR91|MIRN17|MIRN91|hsa-mir-17|miR-17|miR17-3p|miRNA17|miRNA91	13	13q31.3	microRNA 17	miscRNA	-
6275	PAH,	S100A4	18A2|42A|CAPL|FSP1|MTS1|P9KA|PEL98	1	1q21	S100 calcium binding protein A4	protein-coding	S100 calcium-binding protein A4 (calcium protein, calvasculin, metastasin, murine placental homolog)|fibroblast-specific protein-1|leukemia multidrug resistance associated protein|malignant transformation suppression 1|placental calcium-binding protein|protein Mts1|protein S100-A4
4312	PAH,	MMP1	CLG|CLGN	11	11q22.3	matrix metallopeptidase 1 (interstitial collagenase)	protein-coding	fibroblast collagenase|interstitial collagenase|matrix metalloprotease 1|matrix metalloproteinase 1
26284	PAH,	ERAL1	ERA|ERAL1A|H-ERA|HERA-A|HERA-B	17	17q11.2	Era G-protein-like 1 (E. coli)	protein-coding	CEGA|ERA-W|ERA-like protein 1|GTP-binding protein era homolog|GTPase Era, mitochondrial|GTPase, human homolog of E. coli essential cell cycle protein Era|conserved ERA-like GTPase|era (E. coli G-protein homolog)-like 1|hERA
1605	PAH,	DAG1	156DAG|A3a|AGRNR|DAG|MDDGC7|MDDGC9	3	3p21	dystroglycan 1 (dystrophin-associated glycoprotein 1)	protein-coding	dystroglycan
4088	PAH,	SMAD3	HSPC193|HsT17436|JV15-2|LDS1C|LDS3|MADH3	15	15q22.33	SMAD family member 3	protein-coding	MAD homolog 3|MAD, mothers against decapentaplegic homolog 3|SMA- and MAD-related protein 3|SMAD, mothers against DPP homolog 3|hMAD-3|hSMAD3|mad homolog JV15-2|mad protein homolog|mad3|mothers against DPP homolog 3|mothers against decapentaplegic homolog 3
1907	PH,	EDN2	ET2|PPET2	1	1p34	endothelin 2	protein-coding	ET-2|endothelin-2|preproendothelin 2|preproendothelin-2
388585	PAH,	HES5	bHLHb38	1	1p36.32	hairy and enhancer of split 5 (Drosophila)	protein-coding	class B basic helix-loop-helix protein 38|transcription factor HES-5
4128	PAH,	MAOA	MAO-A	X	Xp11.3	monoamine oxidase A	protein-coding	amine oxidase [flavin-containing] A|monoamine oxidase type A
7054	PAH,	TH	DYT14|DYT5b|TYH	11	11p15.5	tyrosine hydroxylase	protein-coding	dystonia 14|tyrosine 3-hydroxylase|tyrosine 3-monooxygenase
2294	PAH,	FOXF1	ACDMPV|FKHL5|FREAC1	16	16q24	forkhead box F1	protein-coding	FREAC-1|Forkhead, drosophila, homolog-like 5|forkhead box protein F1|forkhead-related activator 1|forkhead-related protein FKHL5|forkhead-related transcription factor 1
100128044	PAH,	HNRNPA1P11	-	18	18q22.3	heterogeneous nuclear ribonucleoprotein A1 pseudogene 11	pseudo	-
57154	PAH,	SMURF1	-	7	7q22.1	SMAD specific E3 ubiquitin protein ligase 1	protein-coding	E3 ubiquitin ligase SMURF1|E3 ubiquitin-protein ligase SMURF1|SMAD-specific E3 ubiquitin-protein ligase 1|Smad ubiquitination regulatory factor 1|Smad-specific E3 ubiquitin ligase 1|hSMURF1
5594	PAH,	MAPK1	ERK|ERK2|ERT1|MAPK2|P42MAPK|PRKM1|PRKM2|p38|p40|p41|p41mapk	22	22q11.21	mitogen-activated protein kinase 1	protein-coding	ERK-2|MAP kinase 1|MAP kinase 2|MAP kinase isoform p42|MAPK 2|extracellular signal-regulated kinase 2|mitogen-activated protein kinase 2|p42-MAPK|protein tyrosine kinase ERK2
51385	PAH,	ZNF589	SZF1	3	3p21	zinc finger protein 589	protein-coding	KRAB-zinc finger protein SZF1-1|stem cell zinc finger protein 1
4089	PAH,	SMAD4	DPC4|JIP|MADH4|MYHRS	18	18q21.1	SMAD family member 4	protein-coding	MAD homolog 4|SMAD, mothers against DPP homolog 4|deleted in pancreatic carcinoma locus 4|deletion target in pancreatic carcinoma 4|mothers against decapentaplegic homolog 4|mothers against decapentaplegic, Drosophila, homolog of, 4
4318	PAH,	MMP9	CLG4B|GELB|MANDP2|MMP-9	20	20q11.2-q13.1	matrix metallopeptidase 9 (gelatinase B, 92kDa gelatinase, 92kDa type IV collagenase)	protein-coding	92 kDa gelatinase|92 kDa type IV collagenase|macrophage gelatinase|matrix metalloproteinase 9 (gelatinase B, 92kDa gelatinase, 92kDa type IV collagenase)|matrix metalloproteinase-9|type V collagenase
1236	PAH,	CCR7	BLR2|CD197|CDw197|CMKBR7|EBI1	17	17q12-q21.2	chemokine (C-C motif) receptor 7	protein-coding	C-C CKR-7|C-C chemokine receptor type 7|CC chemokine receptor 7|CC-CKR-7|CCR-7|EBV-induced G protein-coupled receptor 1|EBV-induced G-protein coupled receptor 1|Epstein-Barr virus induced G-protein coupled receptor|Epstein-Barr virus induced gene 1|MIP-3 beta receptor|chemokine (C-C) receptor 7|epstein-Barr virus-induced G-protein coupled receptor 1|lymphocyte-specific G protein-coupled peptide r…
406886	PH,	MIRLET7D	LET7D|MIRNLET7D|hsa-let-7d|let-7d	9	9q22.32	microRNA let-7d	miscRNA	-
29090	PAH,	TIMM21	C18orf55|TIM21	18	18q22.3	translocase of inner mitochondrial membrane 21 homolog (yeast)	protein-coding	TIM21-like protein, mitochondrial|mitochondrial import inner membrane translocase subunit Tim21
9518	PAH,	GDF15	GDF-15|MIC-1|MIC1|NAG-1|PDF|PLAB|PTGFB	19	19p13.11	growth differentiation factor 15	protein-coding	NRG-1|NSAID (nonsteroidal anti-inflammatory drug)-activated protein 1|NSAID-activated gene 1 protein|NSAID-regulated gene 1 protein|PTGF-beta|growth/differentiation factor 15|macrophage inhibitory cytokine 1|placental TGF-beta|placental bone morphogenetic protein|prostate differentiation factor
51478	PAH,	HSD17B7	PRAP|SDR37C1	1	1q23	hydroxysteroid (17-beta) dehydrogenase 7	protein-coding	17 beta-hydroxysteroid dehydrogenase type VII|17-beta-HSD 7|17-beta-hydroxysteroid dehydrogenase 7|17beta hydroxysteroid dehydrogenase|3-keto-steroid reductase|estradiol 17-beta-dehydrogenase 7|short chain dehydrogenase/reductase family 37C, member 1
10956	HPH,	OS9	ERLEC2|OS-9	12	12q13	osteosarcoma amplified 9, endoplasmic reticulum lectin	protein-coding	amplified in osteosarcoma 9|endoplasmic reticulum lectin 2|erlectin 2|osteosarcoma amplified 9, endoplasmic reticulum associated protein|protein OS-9
3123	PAH,	HLA-DRB1	DRB1|DRw10|HLA-DR1B|HLA-DRB|SS1	6	6p21.3	major histocompatibility complex, class II, DR beta 1	protein-coding	DW2.2/DR2.2|HLA class II histocompatibility antigen, DR-1 beta chain|MHC class II HLA-DR beta 1 chain|MHC class II HLA-DR-beta cell surface glycoprotein|MHC class II HLA-DRw10-beta|MHC class II antigen|human leucocyte antigen DRB1|lymphocyte antigen DRB1
3662	PAH,	IRF4	LSIRF|MUM1|NF-EM5	6	6p25-p23	interferon regulatory factor 4	protein-coding	lymphocyte-specific interferon regulatory factor|multiple myeloma oncogene 1
1230	PAH,	CCR1	CD191|CKR-1|CKR1|CMKBR1|HM145|MIP1aR|SCYAR1	3	3p21	chemokine (C-C motif) receptor 1	protein-coding	C-C CKR-1|C-C chemokine receptor type 1|CC-CKR-1|CCR-1|LD78 receptor|MIP-1alpha-R|RANTES receptor|RANTES-R|macrophage inflammatory protein 1-alpha receptor
1361	PH,	CPB2	CPU|PCPB|TAFI	13	13q14.11	carboxypeptidase B2 (plasma)	protein-coding	carboxypeptidase B-like protein|carboxypeptidase B2|carboxypeptidase B2 (plasma, carboxypeptidase U)|carboxypeptidase R|thrombin-activable fibrinolysis inhibitor|thrombin-activatable fibrinolysis inhibitor
6387	PAH,	CXCL12	IRH|PBSF|SCYB12|SDF1|SDF1A|SDF1B|TLSF|TPAR1	10	10q11.1	chemokine (C-X-C motif) ligand 12	protein-coding	intercrine reduced in hepatomas|pre-B cell growth-stimulating factor|stromal cell-derived factor 1
259236	PAH,	TMIE	DFNB6	3	3p21	transmembrane inner ear	protein-coding	transmembrane inner ear expressed protein|transmembrane inner ear protein
960	PAH,	CD44	CDW44|CSPG8|ECMR-III|HCELL|HUTCH-I|IN|LHR|MC56|MDU2|MDU3|MIC4|Pgp1	11	11p13	CD44 molecule (Indian blood group)	protein-coding	CD44 antigen|GP90 lymphocyte homing/adhesion receptor|Hermes antigen|cell surface glycoprotein CD44|chondroitin sulfate proteoglycan 8|epican|extracellular matrix receptor III|hematopoietic cell E- and L-selectin ligand|heparan sulfate proteoglycan|homing function and Indian blood group system|hyaluronate receptor|phagocytic glycoprotein 1
10911	PH,	UTS2	PRO1068|U-II|UCN2|UII	1	1p36	urotensin 2	protein-coding	prepro U-II|urotensin II|urotensin-2
6774	PAH,	STAT3	APRF|HIES	17	17q21.31	signal transducer and activator of transcription 3 (acute-phase response factor)	protein-coding	DNA-binding protein APRF|acute-phase response factor|signal transducer and activator of transcription 3
79895	PAH,	ATP8B4	ATPIM	15	15q21.2	ATPase, class I, type 8B, member 4	protein-coding	potential phospholipid-transporting ATPase IM|probable phospholipid-transporting ATPase IM
474171	PAH,	STGC3	-	3	3p21	uncharacterized STGC3	unknown	-
51144	PAH,	HSD17B12	KAR|SDR12C1	11	11p11.2	hydroxysteroid (17-beta) dehydrogenase 12	protein-coding	17-beta-HSD 12|17-beta-hydroxysteroid dehydrogenase 12|17beta-HSD type 12|3-ketoacyl-CoA reductase|estradiol 17-beta-dehydrogenase 12|short chain dehydrogenase/reductase family 12C, member 1|steroid dehydrogenase homolog
1843	PH,	DUSP1	CL100|HVH1|MKP-1|MKP1|PTPN10	5	5q34	dual specificity phosphatase 1	protein-coding	MAP kinase phosphatase 1|dual specificity protein phosphatase 1|dual specificity protein phosphatase hVH1|mitogen-activated protein kinase phosphatase 1|protein-tyrosine phosphatase CL100|serine/threonine specific protein phosphatase
7124	PAH,	TNF	DIF|TNF-alpha|TNFA|TNFSF2	6	6p21.3	tumor necrosis factor	protein-coding	APC1 protein|TNF, macrophage-derived|TNF, monocyte-derived|TNF-a|cachectin|tumor necrosis factor ligand superfamily member 2|tumor necrosis factor-alpha
1373	PAH,	CPS1	CPSASE1	2	2q35	carbamoyl-phosphate synthase 1, mitochondrial	protein-coding	carbamoyl-phosphate synthase [ammonia], mitochondrial|carbamoylphosphate synthetase I
387	PAH,	RHOA	ARH12|ARHA|RHO12|RHOH12	3	3p21.3	ras homolog family member A	protein-coding	Aplysia ras-related homolog 12|h12|oncogene RHO H12|ras homolog gene family, member A|rho cDNA clone 12|small GTP binding protein RhoA|transforming protein RhoA
5739	PH,	PTGIR	IP|PRIPR	19	19q13.3	prostaglandin I2 (prostacyclin) receptor (IP)	protein-coding	PGI receptor|PGI2 receptor|prostacyclin receptor|prostaglandin I2 receptor|prostanoid IP receptor
2104	PAH,	ESRRG	ERR3|ERRgamma|NR3B3	1	1q41	estrogen-related receptor gamma	protein-coding	ERR gamma-2|estrogen receptor-related protein 3|nuclear receptor subfamily 3 group B member 3
574411	PH,	MIR451A	MIR451|MIRN451|hsa-mir-451|hsa-mir-451a	17	17q11.2	microRNA 451a	miscRNA	-
826	PH,	CAPNS1	30K|CALPAIN4|CANP|CANPS|CAPN4|CDPS|CSS1	19	19q13.12	calpain, small subunit 1	protein-coding	CANP small subunit|calcium-activated neutral proteinase small subunit|calcium-dependent protease small subunit 1|calcium-dependent protease, small subunit|calpain 4, small subunit (30K)|calpain regulatory subunit|calpain small subunit 1|calpain, small polypeptide
84735	PAH,	CNDP1	CN1|CPGL2|HsT2308	18	18q22.3	carnosine dipeptidase 1 (metallopeptidase M20 family)	protein-coding	CNDP dipeptidase 1|beta-Ala-His dipeptidase|carnosinase 1|glutamate carboxypeptidase-like protein 2|serum carnosinase
23365	PH,	ARHGEF12	LARG|PRO2792	11	11q23.3	Rho guanine nucleotide exchange factor (GEF) 12	protein-coding	leukemia-associated RhoGEF|leukemia-associated rho guanine nucleotide exchange factor|rho guanine nucleotide exchange factor 12
345275	PAH,	HSD17B13	NIIL497|SCDR9|SDR16C3	4	4q22.1	hydroxysteroid (17-beta) dehydrogenase 13	protein-coding	17-beta hydroxysteroid dehydrogenase|17-beta-HSD 13|17-beta-hydroxysteroid dehydrogenase 13|short chain dehydrogenase/reductase family 16C, member 3|short-chain dehydrogenase/reductase 9
3953	PAH,	LEPR	CD295|LEP-R|LEPRD|OB-R|OBR	1	1p31	leptin receptor	protein-coding	OB receptor|huB219
185	PAH,	AGTR1	AG2S|AGTR1A|AGTR1B|AT1|AT1AR|AT1B|AT1BR|AT1R|AT2R1|AT2R1A|AT2R1B|HAT1R	3	3q24	angiotensin II receptor, type 1	protein-coding	type-1 angiotensin II receptor|type-1B angiotensin II receptor
5265	PAH,	SERPINA1	A1A|A1AT|AAT|PI|PI1|PRO2275|alpha1AT	14	14q32.1	serpin peptidase inhibitor, clade A (alpha-1 antiproteinase, antitrypsin), member 1	protein-coding	alpha-1 protease inhibitor|alpha-1-antiproteinase|alpha-1-antitrypsin|alpha-1-antitrypsin null|protease inhibitor 1 (anti-elastase), alpha-1-antitrypsin|serine (or cysteine) proteinase inhibitor, clade A, member 1|serpin A1
246321	PAH,	HSCRS2	-	3	3p21	Hirschsprung disease, short-segment, 2	unknown	-
3357	PAH,	HTR2B	5-HT(2B)|5-HT2B	2	2q36.3-q37.1	5-hydroxytryptamine (serotonin) receptor 2B, G protein-coupled	protein-coding	5-HT 2B receptor|5-HT-2B|5-hydroxytryptamine 2B receptor|5-hydroxytryptamine receptor 2B|5-hydroxytryptamine receptor 2B variant b|serotonin receptor 2B
51378	PH,	ANGPT4	AGP4|ANG-3|ANG4	20	20p13	angiopoietin 4	protein-coding	ANG-4|angiopoietin-3|angiopoietin-4|dJ824F16.2 (angiopoietin 4)
7434	PAH,	VIPR2	C16DUPq36.3|DUP7q36.3|PACAP-R-3|PACAP-R3|VIP-R-2|VPAC2|VPAC2R|VPCAP2R	7	7q36.3	vasoactive intestinal peptide receptor 2	protein-coding	PACAP type III receptor|VIP and PACAP receptor 2|helodermin-preferring VIP receptor|pituitary adenylate cyclase-activating polypeptide type III receptor|vasoactive intestinal polypeptide receptor 2
406883	PH,	MIRLET7A3	LET7A3|MIRNLET7A3|let-7a-3	22	22q13.31	microRNA let-7a-3	miscRNA	-
