# Supplementary material for: An evidence-based knowledgebase of pulmonary arterial hypertension to identify genes and pathways relevant to pathogenesis
Source: Royal Society of Chemistry journal article supplement (doi:10.1039/c3mb70496c), 2014-01-10
Supplement: c3mb70496c_2.xlsx [file c3mb70496c_2.xlsx]

## Sheet: TableS2
Table S2. Gene ranking result of the 209 human PH-related genes.
Gene Symbol	Description	Global prioritization score	Rank	Rank ratio	Annotation - EnsemblEst score	Rank	Rank ratio	Annotation - GeneOntology score	Rank	Rank ratio	Annotation - Interpro score	Rank	Rank ratio	Annotation - Kegg score	Rank	Rank ratio	Annotation - Swissprot score	Rank	Rank ratio	BLAST score	Rank	Rank ratio	CisRegModule score	Rank	Rank ratio	Expression - SonEtAl score	Rank	Rank ratio	Expression - SuEtAl score	Rank	Rank ratio	Interaction - Bind score	Rank	Rank ratio	Interaction - BioGrid score	Rank	Rank ratio	Interaction - Hprd score	Rank	Rank ratio	Interaction - InNetDb score	Rank	Rank ratio	Interaction - Intact score	Rank	Rank ratio	Interaction - Mint score	Rank	Rank ratio
BMPR1A	Bone morphogenetic protein receptor type IA precursor (EC 2.7.11.30) (Serine/threonine-protein kinase receptor R5) (SKR5) (Activin receptor-like kinase 3) (ALK-3) (CD292 antigen). [Source:Uniprot/SWISSPROT;Acc:P36894]	1	2.8e-05	0.00478	65	1	0.5	32	1.87e-14	0.155	3	1.51e-07	0.00976	4	0.00221	0.0896	35	1.41e-05	0.164	3	9.49e-107	0.0144	38	0.0711	0.29	40	0.721	0.209	152	0.867	0.804	154	none	0.507	6	1.6	0.0287	6	1.55	0.0287	1	1.5	0.00478	7	none	0.517	1	1	0.00478
TGFBR1	TGF-beta receptor type-1 precursor (EC 2.7.11.30) (TGF-beta receptor type I) (TGFR-1) (TGF-beta type I receptor) (Transforming growth factor-beta receptor type I) (TbetaR-I) (Serine/threonine-protein kinase receptor R4) (SKR4) (Activin receptor-like kinas [Source:Uniprot/SWISSPROT;Acc:P36897]	2	5.35e-05	0.00957	196	none	none	21	4.38e-18	0.101	2	1.51e-07	0.00976	3	0.00221	0.0896	34	1.41e-05	0.164	2	2e-113	0.00957	22	0.0629	0.168	35	0.706	0.183	171	0.892	0.905	2	8	0.00957	10	3	0.0478	36	12	0.177	3	1.75	0.0144	9	none	0.517	11	none	0.522
TGFBR2	TGF-beta receptor type-2 precursor (EC 2.7.11.30) (TGF-beta receptor type II) (TGFR-2) (TGF-beta type II receptor) (Transforming growth factor-beta receptor type II) (TbetaR-II). [Source:Uniprot/SWISSPROT;Acc:P37173]	3	0.000195	0.0144	151	1	0.5	82	6.75e-08	0.396	4	3.22e-05	0.0195	5	0.00221	0.0896	20	2.03e-06	0.0966	5	1.73e-56	0.0239	93	none	0.847	16	0.64	0.0838	67	0.787	0.354	69	none	0.507	9	2.44	0.0431	9	3.45	0.0431	8	2.4	0.0383	14	none	0.517	16	none	0.522
ANGPT1	Angiopoietin-1 precursor (ANG-1). [Source:Uniprot/SWISSPROT;Acc:Q15389]	4	0.000307	0.0191	89	1	0.5	4	1.09e-38	0.0193	46	1	0.605	146	none	none	29	1.23e-05	0.14	90	none	0.679	53	0.114	0.405	39	0.719	0.204	142	0.858	0.751	144	none	0.507	2	1	0.00478	1	1.33	0.00478	45	11.5	0.215	49	none	0.517	51	none	0.522
PDGFRA	Alpha platelet-derived growth factor receptor precursor (EC 2.7.10.1) (PDGF-R-alpha) (CD140a antigen). [Source:Uniprot/SWISSPROT;Acc:P16234]	5	0.000355	0.0239	176	1	0.5	17	2.09e-20	0.0821	15	0.0108	0.0732	35	1	0.612	32	1.32e-05	0.155	8	2e-38	0.0383	21	0.0624	0.16	103	0.807	0.539	45	0.761	0.238	47	none	0.507	18	6.33	0.0861	15	4	0.067	25	5.4	0.12	31	none	0.517	33	none	0.522
PDGFRB	Beta platelet-derived growth factor receptor precursor (EC 2.7.10.1) (PDGF-R-beta) (CD140b antigen). [Source:Uniprot/SWISSPROT;Acc:P09619]	6	0.000563	0.0287	71	1	0.5	104	8.09e-05	0.502	16	0.0108	0.0732	36	1	0.612	36	1.71e-05	0.174	10	9e-36	0.0478	41	0.0726	0.313	11	0.619	0.0576	19	0.692	0.101	21	none	0.507	22	8	0.105	18	4.82	0.0861	17	3.75	0.0813	23	none	0.517	25	none	0.522
TGFBR3	TGF-beta receptor type III precursor (TGFR-3) (Transforming growth factor beta receptor III) (Betaglycan). [Source:Uniprot/SWISSPROT;Acc:Q03167]	7	0.00163	0.0335	62	1	0.5	67	4.59e-09	0.324	19	0.134	0.0927	137	none	none	16	1.55e-06	0.0773	21	3.46e-06	0.1	133	none	none	14	0.634	0.0733	148	0.862	0.783	150	none	0.507	4	1.29	0.0191	3	1.5	0.0144	4	1.92	0.0191	10	none	0.517	12	none	0.522
SCN5A	Sodium channel protein type 5 subunit alpha (Sodium channel protein type V subunit alpha) (Voltage-gated sodium channel subunit alpha Nav1.5) (Sodium channel protein, cardiac muscle alpha-subunit) (HH1). [Source:Uniprot/SWISSPROT;Acc:Q14524]	8	0.00199	0.0383	108	1	0.5	28	4.55e-15	0.135	23	0.34	0.112	141	none	none	44	2.86e-05	0.213	99	none	0.679	11	0.0498	0.084	3	0.58	0.0157	37	0.755	0.196	39	none	0.507	67	none	0.598	24	6.5	0.115	46	11.5	0.215	50	none	0.517	52	none	0.522
SERPINE1	Plasminogen activator inhibitor 1 precursor (PAI-1) (Endothelial plasminogen activator inhibitor) (PAI). [Source:Uniprot/SWISSPROT;Acc:P05121]	9	0.00223	0.0431	24	1	0.5	8	8.5e-36	0.0386	50	1	0.605	56	1	0.612	54	4.77e-05	0.266	105	none	0.679	39	0.0716	0.298	31	0.695	0.162	7	0.583	0.037	9	none	0.507	46	none	0.598	42	15	0.201	44	10.8	0.211	3	4	0.0144	4	4	0.0191
TGFB1	Transforming growth factor beta-1 precursor (TGF-beta-1) [Contains: Latency-associated peptide (LAP)]. [Source:Uniprot/SWISSPROT;Acc:P01137]	10	0.00245	0.0478	48	1	0.5	31	7.1e-15	0.15	67	1	0.605	13	0.00221	0.0896	38	2.01e-05	0.188	95	none	0.679	2	0.0422	0.0153	24	0.673	0.126	161	0.879	0.852	163	none	0.507	13	4.57	0.0622	16	4.5	0.0766	54	15.4	0.258	58	none	0.517	60	none	0.522
EGFR	Epidermal growth factor receptor precursor (EC 2.7.10.1) (Receptor tyrosine-protein kinase ErbB-1). [Source:Uniprot/SWISSPROT;Acc:P00533]	11	0.00397	0.0526	37	1	0.5	35	4.03e-13	0.169	13	0.00487	0.0634	33	1	0.612	27	1.2e-05	0.13	6	4e-40	0.0287	48	0.092	0.366	127	0.842	0.665	22	0.717	0.116	24	none	0.507	29	13.4	0.139	35	11.5	0.167	48	12.4	0.23	52	none	0.517	54	none	0.522
BMPR1B	Bone morphogenetic protein receptor type IB precursor (EC 2.7.11.30) (CDw293 antigen). [Source:Uniprot/SWISSPROT;Acc:O00238]	12	0.00414	0.0574	188	1	0.5	19	5.75e-20	0.0918	1	1.51e-07	0.00976	2	0.00221	0.0896	65	0.000125	0.314	4	3e-105	0.0191	92	none	0.847	199	none	none	136	0.853	0.72	138	none	0.507	1	1	0.00478	21	5.08	0.1	30	7.43	0.144	36	none	0.517	38	none	0.522
AGTR1	Type-1 angiotensin II receptor (AT1) (AT1AR) (AT1BR). [Source:Uniprot/SWISSPROT;Acc:P30556]	13	0.00528	0.0622	15	1	0.5	24	4.01e-17	0.116	62	1	0.605	24	0.0201	0.172	48	4.47e-05	0.237	39	366	0.187	143	none	none	45	0.729	0.236	24	0.726	0.127	26	none	0.507	57	none	0.598	46	18	0.22	2	1.62	0.00957	8	none	0.517	10	none	0.522
NOTCH3	Neurogenic locus notch homolog protein 3 precursor (Notch 3) [Contains: Notch 3 extracellular truncation; Notch 3 intracellular domain]. [Source:Uniprot/SWISSPROT;Acc:Q9UM47]	14	0.00539	0.067	117	1	0.5	70	6.57e-09	0.338	28	0.445	0.137	40	1	0.612	3	2.81e-07	0.00966	18	3.87e-09	0.0861	16	0.06	0.122	47	0.732	0.246	18	0.685	0.0952	20	none	0.507	53	none	0.598	79	none	0.665	28	6.4	0.134	34	none	0.517	36	none	0.522
BMP2	Bone morphogenetic protein 2 precursor (BMP-2) (BMP-2A). [Source:Uniprot/SWISSPROT;Acc:P12643]	15	0.00609	0.0718	209	none	none	30	6.45e-15	0.145	66	1	0.605	12	0.00221	0.0896	45	2.89e-05	0.217	53	676	0.254	44	0.0753	0.336	106	0.813	0.555	3	0.542	0.0159	5	none	0.507	7	1.63	0.0335	7	2	0.0335	14	3.2	0.067	20	none	0.517	22	none	0.522
MMP2	72 kDa type IV collagenase precursor (EC 3.4.24.24) (72 kDa gelatinase) (Matrix metalloproteinase-2) (MMP-2) (Gelatinase A) (TBE- 1). [Source:Uniprot/SWISSPROT;Acc:P08253]	16	0.00883	0.0766	3	1	0.5	27	2.98e-15	0.13	24	0.411	0.122	37	1	0.612	61	7e-05	0.295	108	none	0.679	89	0.187	0.679	13	0.632	0.0681	16	0.668	0.0847	18	none	0.507	31	18	0.148	61	33	0.292	34	8	0.158	40	none	0.517	42	none	0.522
EDN3	Endothelin-3 precursor (ET-3) (Preproendothelin-3) (PPET3). [Source:Uniprot/SWISSPROT;Acc:P14138]	17	0.0118	0.0813	76	1	0.5	53	6.33e-11	0.256	17	0.0296	0.0829	136	none	none	24	6.25e-06	0.116	12	2.45e-13	0.0574	94	none	0.847	139	0.857	0.728	121	0.838	0.64	123	none	0.507	5	1.5	0.0239	4	1.5	0.0144	18	4.33	0.0861	24	none	0.517	26	none	0.522
TNC	Tenascin precursor (TN) (Tenascin-C) (TN-C) (Hexabrachion) (Cytotactin) (Neuronectin) (GMEM) (JI) (Myotendinous antigen) (Glioma- associated-extracellular matrix antigen) (GP 150-225). [Source:Uniprot/SWISSPROT;Acc:P24821]	18	0.0123	0.0861	180	1	0.5	93	8.89e-07	0.449	30	0.475	0.146	42	1	0.612	53	4.77e-05	0.266	17	2.83e-09	0.0813	25	0.0645	0.191	108	0.815	0.565	122	0.839	0.646	124	none	0.507	141	none	0.598	28	7	0.129	116	none	0.756	118	none	0.517	119	none	0.522
IL1R1	Interleukin-1 receptor type I precursor (IL-1R-1) (IL-1RT1) (IL-1R- alpha) (p80) (CD121a antigen). [Source:Uniprot/SWISSPROT;Acc:P14778]	19	0.0138	0.0909	162	1	0.5	61	1.18e-09	0.29	33	0.531	0.18	44	1	0.612	13	1.36e-06	0.0676	82	none	0.679	160	none	none	10	0.617	0.0524	9	0.61	0.0476	11	none	0.507	20	7	0.0957	37	12	0.177	33	8	0.158	39	none	0.517	41	none	0.522
EDNRA	Endothelin-1 receptor precursor (Endothelin A receptor) (ET-A) (hET- AR) (ETA-R). [Source:Uniprot/SWISSPROT;Acc:P25101]	20	0.0143	0.0957	69	1	0.5	2	6.01e-41	0.00966	44	1	0.605	53	1	0.612	25	6.9e-06	0.121	87	none	0.679	104	none	0.847	38	0.717	0.199	28	0.734	0.148	30	none	0.507	12	3.5	0.0526	10	3.5	0.0526	51	13.3	0.244	55	none	0.517	57	none	0.522
GDF5	Growth/differentiation factor 5 precursor (GDF-5) (Cartilage-derived morphogenetic protein 1) (CDMP-1) (Radotermin). [Source:Uniprot/SWISSPROT;Acc:P43026]	21	0.0151	0.1	197	none	none	51	3.19e-11	0.246	82	1	0.605	19	0.00221	0.0896	31	1.26e-05	0.15	92	none	0.679	162	none	none	128	0.843	0.67	69	0.789	0.365	71	none	0.507	3	1.17	0.0144	2	1.5	0.0144	27	6	0.129	33	none	0.517	35	none	0.522
AKT1	RAC-alpha serine/threonine-protein kinase (EC 2.7.11.1) (RAC-PK-alpha) (Protein kinase B) (PKB) (C-AKT). [Source:Uniprot/SWISSPROT;Acc:P31749]	22	0.0159	0.105	141	1	0.5	74	1.05e-08	0.357	7	0.00455	0.039	31	1	0.612	160	0.261	0.773	13	3.46e-13	0.0622	9	0.0453	0.0687	78	0.778	0.408	23	0.724	0.122	25	none	0.507	56	none	0.598	59	26	0.282	73	27.5	0.349	77	none	0.517	78	none	0.522
ACE2	Angiotensin-converting enzyme 2 precursor (EC 3.4.17.-) (ACE-related carboxypeptidase) (Angiotensin-converting enzyme homolog) (ACEH). [Source:Uniprot/SWISSPROT;Acc:Q9BYF1]	23	0.0162	0.11	107	1	0.5	164	0.158	0.792	18	0.0518	0.0878	23	0.0201	0.172	43	2.61e-05	0.208	1	2.83e-145	0.00478	85	0.16	0.649	123	0.835	0.644	125	0.842	0.661	127	none	0.507	144	none	0.598	150	none	0.665	5	2	0.0239	11	none	0.517	13	none	0.522
VIPR1	Vasoactive intestinal polypeptide receptor 1 precursor (VIP-R-1) (Pituitary adenylate cyclase-activating polypeptide type II receptor) (PACAP type II receptor) (PACAP-R-2). [Source:Uniprot/SWISSPROT;Acc:P32241]	24	0.0199	0.115	119	1	0.5	52	3.35e-11	0.251	83	1	0.605	71	1	0.612	15	1.36e-06	0.0676	84	none	0.679	5	0.0432	0.0382	69	0.767	0.361	6	0.582	0.0317	8	none	0.507	45	none	0.598	73	none	0.665	10	2.56	0.0478	16	none	0.517	18	none	0.522
TGFBI	Transforming growth factor-beta-induced protein ig-h3 precursor (Beta ig-h3) (Kerato-epithelin) (RGD-containing collagen-associated protein) (RGD-CAP). [Source:Uniprot/SWISSPROT;Acc:Q15582]	25	0.0205	0.12	95	1	0.5	141	0.0328	0.681	144	1	0.605	173	none	none	76	0.000235	0.362	55	729	0.263	79	0.151	0.603	37	0.717	0.194	13	0.642	0.0688	15	none	0.507	51	none	0.598	77	none	0.665	20	4.67	0.0957	26	none	0.517	28	none	0.522
EDNRB	Endothelin B receptor precursor (ET-B) (Endothelin receptor Non- selective type). [Source:Uniprot/SWISSPROT;Acc:P24530]	26	0.0219	0.124	183	1	0.5	14	1.65e-24	0.0676	56	1	0.605	27	0.0785	0.201	2	2.81e-07	0.00966	77	none	0.679	101	none	0.847	20	0.663	0.105	15	0.655	0.0794	17	none	0.507	11	3.5	0.0526	14	4	0.067	109	none	0.756	112	none	0.517	113	none	0.522
BMP4	Bone morphogenetic protein 4 precursor (BMP-4) (BMP-2B). [Source:Uniprot/SWISSPROT;Acc:P12644]	27	0.0242	0.129	110	1	0.5	7	5.69e-36	0.0338	49	1	0.605	9	0.00221	0.0896	28	1.23e-05	0.14	89	none	0.679	7	0.0438	0.0534	99	0.801	0.518	189	0.954	1	189	none	0.507	8	2	0.0383	13	3.75	0.0622	63	19	0.301	67	none	0.517	69	none	0.522
VEGFA	Vascular endothelial growth factor A precursor (VEGF-A) (Vascular permeability factor) (VPF). [Source:Uniprot/SWISSPROT;Acc:P15692]	28	0.0248	0.134	59	1	0.5	6	6.09e-37	0.029	48	1	0.605	55	1	0.612	86	0.000532	0.415	66	883	0.316	54	0.116	0.412	72	0.772	0.377	60	0.781	0.317	62	none	0.507	89	none	0.598	108	none	0.665	31	7.43	0.144	37	none	0.517	39	none	0.522
WNT1	Proto-oncogene protein Wnt-1 precursor. [Source:Uniprot/SWISSPROT;Acc:P04628]	29	0.0252	0.139	157	1	0.5	37	6.03e-13	0.179	71	1	0.605	28	0.0785	0.201	66	0.000143	0.324	111	none	0.679	3	0.0428	0.0229	192	none	none	119	0.835	0.63	121	none	0.507	140	none	0.598	147	none	0.665	170	none	0.756	170	none	0.517	170	none	0.522
DAG1	Dystroglycan precursor (Dystrophin-associated glycoprotein 1) [Contains: Alpha-dystroglycan (Alpha-DG); Beta-dystroglycan (Beta- DG)]. [Source:Uniprot/SWISSPROT;Acc:Q14118]	30	0.0253	0.144	13	1	0.5	48	1.12e-11	0.232	79	1	0.605	70	1	0.612	12	1.15e-06	0.058	81	none	0.679	24	0.0638	0.183	93	0.796	0.487	5	0.572	0.0265	7	none	0.507	25	10	0.124	22	5.33	0.105	29	7.14	0.139	35	none	0.517	37	none	0.522
RYK	Tyrosine-protein kinase RYK precursor (EC 2.7.10.1). [Source:Uniprot/SWISSPROT;Acc:P34925]	31	0.0264	0.148	39	1	0.5	23	1.56e-17	0.111	12	0.00487	0.0634	135	none	none	63	7.84e-05	0.304	7	7.75e-39	0.0335	87	0.168	0.664	142	0.858	0.743	85	0.808	0.45	87	none	0.507	110	none	0.598	126	none	0.665	16	3.5	0.0766	22	none	0.517	24	none	0.522
CD44	CD44 antigen precursor (Phagocytic glycoprotein I) (PGP-1) (HUTCH-I) (Extracellular matrix receptor-III) (ECMR-III) (GP90 lymphocyte homing/adhesion receptor) (Hermes antigen) (Hyaluronate receptor) (Heparan sulfate proteoglycan) (Epican) (CDw44). [Source:Uniprot/SWISSPROT;Acc:P16070]	32	0.0281	0.153	152	1	0.5	29	5.21e-15	0.14	65	1	0.605	64	1	0.612	14	1.36e-06	0.0676	83	none	0.679	17	0.0606	0.13	6	0.594	0.0314	137	0.855	0.725	139	none	0.507	24	9	0.11	30	8.75	0.144	118	none	0.756	120	none	0.517	121	none	0.522
NOS3	Nitric-oxide synthase, endothelial (EC 1.14.13.39) (EC-NOS) (NOS type III) (NOSIII) (Endothelial NOS) (eNOS) (Constitutive NOS) (cNOS). [Source:Uniprot/SWISSPROT;Acc:P29474]	33	0.0296	0.158	111	1	0.5	68	4.94e-09	0.329	91	1	0.605	75	1	0.612	99	0.00329	0.483	41	428	0.196	67	0.137	0.511	136	0.853	0.712	54	0.777	0.286	56	none	0.507	83	none	0.598	25	6.5	0.115	66	21	0.316	70	none	0.517	7	8	0.0335
ROCK2	Rho-associated protein kinase 2 (EC 2.7.11.1) (Rho-associated, coiled- coil-containing protein kinase 2) (p164 ROCK-2) (Rho kinase 2). [Source:Uniprot/SWISSPROT;Acc:O75116]	34	0.0298	0.163	146	1	0.5	146	0.0667	0.705	9	0.00455	0.039	6	0.00221	0.0896	146	0.081	0.705	16	1e-09	0.0766	46	0.0811	0.351	105	0.81	0.55	98	0.82	0.519	100	none	0.507	122	none	0.598	135	none	0.665	64	19.8	0.306	68	none	0.517	70	none	0.522
LAMB2	Laminin subunit beta-2 precursor (S-laminin) (Laminin B1s chain). [Source:Uniprot/SWISSPROT;Acc:P55268]	35	0.0305	0.167	105	1	0.5	135	0.0209	0.652	29	0.452	0.141	41	1	0.612	23	5.75e-06	0.111	19	2.83e-07	0.0909	132	none	none	17	0.649	0.089	2	0.515	0.0106	4	none	0.507	43	none	0.598	71	none	0.665	7	2.31	0.0335	13	none	0.517	15	none	0.522
ICAM1	Intercellular adhesion molecule 1 precursor (ICAM-1) (Major group rhinovirus receptor) (CD54 antigen). [Source:Uniprot/SWISSPROT;Acc:P05362]	36	0.0323	0.172	29	1	0.5	86	3.03e-07	0.415	104	1	0.605	85	1	0.612	10	8.08e-07	0.0386	80	none	0.679	50	0.105	0.382	21	0.664	0.11	30	0.736	0.159	32	none	0.507	60	none	0.598	84	none	0.665	19	4.33	0.0861	25	none	0.517	27	none	0.522
SMAD1	Mothers against decapentaplegic homolog 1 (SMAD 1) (Mothers against DPP homolog 1) (Mad-related protein 1) (Transforming growth factor- beta-signaling protein 1) (BSP-1) (hSMAD1) (JV4-1). [Source:Uniprot/SWISSPROT;Acc:Q15797]	37	0.0329	0.177	139	1	0.5	50	1.97e-11	0.242	81	1	0.605	18	0.00221	0.0896	169	0.4	0.831	46	500	0.22	73	0.145	0.557	49	0.734	0.257	113	0.832	0.598	115	none	0.507	21	7.2	0.1	52	21.6	0.249	85	40	0.407	88	none	0.517	89	none	0.522
FOXF1	Forkhead box protein F1 (Forkhead-related protein FKHL5) (Forkhead- related transcription factor 1) (FREAC-1) (Forkhead-related activator 1). [Source:Uniprot/SWISSPROT;Acc:Q12946]	38	0.0335	0.182	54	1	0.5	15	3.38e-24	0.0725	57	1	0.605	148	none	none	195	1	0.937	201	none	0.679	206	none	none	1	0.553	0.00524	1	0.502	0.00529	3	none	0.507	42	none	0.598	70	none	0.665	133	none	0.756	133	none	0.517	133	none	0.522
PDGFB	Platelet-derived growth factor B chain precursor (PDGF B-chain) (Platelet-derived growth factor beta polypeptide) (PDGF-2) (c-sis) (Becaplermin). [Source:Uniprot/SWISSPROT;Acc:P01127]	39	0.0345	0.187	144	1	0.5	124	0.00389	0.599	132	1	0.605	98	1	0.612	95	0.00167	0.459	136	none	0.679	26	0.0652	0.198	9	0.614	0.0471	52	0.775	0.275	54	none	0.507	81	none	0.598	101	none	0.665	15	3.4	0.0718	21	none	0.517	23	none	0.522
HTR1B	5-hydroxytryptamine 1B receptor (5-HT-1B) (Serotonin receptor 1B) (5- HT1B) (5-HT-1D-beta) (Serotonin 1D beta receptor) (S12). [Source:Uniprot/SWISSPROT;Acc:P28222]	40	0.0359	0.191	112	1	0.5	47	1.09e-11	0.227	78	1	0.605	69	1	0.612	49	4.47e-05	0.237	102	none	0.679	82	0.153	0.626	125	0.838	0.654	129	0.848	0.683	131	none	0.507	148	none	0.598	154	none	0.665	39	9.33	0.187	45	none	0.517	47	none	0.522
CEBPB	CCAAT/enhancer-binding protein beta (C/EBP beta) (Nuclear factor NF- IL6) (Transcription factor 5). [Source:Uniprot/SWISSPROT;Acc:P17676]	41	0.037	0.196	42	1	0.5	46	9.25e-12	0.222	77	1	0.605	150	none	none	138	0.0202	0.657	168	none	0.679	35	0.0697	0.267	28	0.687	0.147	75	0.797	0.397	77	none	0.507	100	none	0.598	63	50	0.301	75	28	0.359	79	none	0.517	80	none	0.522
SMAD3	Mothers against decapentaplegic homolog 3 (SMAD 3) (Mothers against DPP homolog 3) (Mad3) (hMAD-3) (JV15-2) (hSMAD3). [Source:Uniprot/SWISSPROT;Acc:P84022]	42	0.0403	0.201	166	1	0.5	16	4.21e-21	0.0773	58	1	0.605	10	0.00221	0.0896	168	0.4	0.831	188	none	0.679	74	0.145	0.565	65	0.761	0.34	26	0.73	0.138	28	none	0.507	40	75	0.191	68	87.5	0.325	23	4.89	0.11	29	none	0.517	31	none	0.522
SPP1	Osteopontin precursor (Bone sialoprotein-1) (Secreted phosphoprotein 1) (SPP-1) (Urinary stone protein) (Nephropontin) (Uropontin). [Source:Uniprot/SWISSPROT;Acc:P10451]	43	0.0437	0.206	47	1	0.5	96	2.45e-06	0.464	112	1	0.605	89	1	0.612	42	2.31e-05	0.203	98	none	0.679	107	none	0.847	201	none	none	173	0.893	0.915	173	none	0.507	178	none	0.598	50	20	0.239	79	31	0.378	5	5	0.0239	6	5	0.0287
HK2	Hexokinase-2 (EC 2.7.1.1) (Hexokinase type II) (HK II) (Muscle form hexokinase). [Source:Uniprot/SWISSPROT;Acc:P52789]	44	0.0466	0.211	174	1	0.5	178	0.415	0.86	176	1	0.605	124	1	0.612	124	0.00794	0.599	42	436	0.201	96	none	0.847	83	0.787	0.435	116	0.834	0.614	118	none	0.507	138	none	0.598	27	7	0.129	115	none	0.756	2	3	0.00478	3	3	0.0144
MAPK1	Mitogen-activated protein kinase 1 (EC 2.7.11.24) (Extracellular signal-regulated kinase 2) (ERK-2) (Mitogen-activated protein kinase 2) (MAP kinase 2) (MAPK 2) (p42-MAPK) (ERT1). [Source:Uniprot/SWISSPROT;Acc:P28482]	45	0.0534	0.215	164	1	0.5	56	7.94e-10	0.271	6	0.00455	0.039	1	0.00168	0.00746	159	0.253	0.768	20	3.74e-07	0.0957	95	none	0.847	140	0.857	0.733	77	0.798	0.407	79	none	0.507	102	none	0.598	55	22.1	0.263	100	83.5	0.478	103	none	0.517	104	none	0.522
ID1	DNA-binding protein inhibitor ID-1 (Inhibitor of DNA binding 1). [Source:Uniprot/SWISSPROT;Acc:P41134]	46	0.0542	0.22	83	1	0.5	3	6.41e-40	0.0145	45	1	0.605	8	0.00221	0.0896	182	1	0.937	50	574	0.239	71	0.144	0.542	36	0.71	0.188	8	0.59	0.0423	10	none	0.507	47	none	0.598	74	none	0.665	38	9	0.182	44	none	0.517	46	none	0.522
TIMP1	Metalloproteinase inhibitor 1 precursor (TIMP-1) (Erythroid- potentiating activity) (EPA) (Tissue inhibitor of metalloproteinases) (Fibroblast collagenase inhibitor) (Collagenase inhibitor). [Source:Uniprot/SWISSPROT;Acc:P01033]	47	0.0555	0.225	142	1	0.5	94	9.42e-07	0.454	111	1	0.605	158	none	none	87	0.000532	0.415	129	none	0.679	28	0.0665	0.214	2	0.562	0.0105	4	0.548	0.0212	6	none	0.507	44	none	0.598	72	none	0.665	35	8.33	0.167	41	none	0.517	43	none	0.522
CXCL12	Stromal cell-derived factor 1 precursor (SDF-1) (CXCL12) (Pre-B cell growth-stimulating factor) (PBSF) (hIRH) [Contains: SDF-1-beta(3-72); SDF-1-alpha(3-67)]. [Source:Uniprot/SWISSPROT;Acc:P48061]	48	0.0571	0.23	72	1	0.5	5	1.12e-38	0.0242	47	1	0.605	54	1	0.612	108	0.00686	0.522	145	none	0.679	31	0.068	0.237	92	0.796	0.482	86	0.809	0.455	88	none	0.507	111	none	0.598	127	none	0.665	9	2.48	0.0431	15	none	0.517	17	none	0.522
VIP	VIP peptides precursor [Contains: Intestinal peptide PHV-42; Intestinal peptide PHM-27 (Peptide histidine methioninamide 27); Vasoactive intestinal peptide (VIP) (Vasoactive intestinal polypeptide)]. [Source:Uniprot/SWISSPROT;Acc:P01282]	49	0.0625	0.234	198	none	none	100	3.27e-05	0.483	116	1	0.605	160	none	none	132	0.0151	0.638	163	none	0.679	83	0.155	0.634	183	0.925	0.958	185	0.924	0.979	185	none	0.507	190	none	0.598	12	3.5	0.0526	42	10.3	0.201	1	3	0.00478	2	2	0.00957
PIM1	Proto-oncogene serine/threonine-protein kinase Pim-1 (EC 2.7.11.1). [Source:Uniprot/SWISSPROT;Acc:P11309]	50	0.0628	0.239	193	none	none	142	0.0343	0.686	8	0.00455	0.039	32	1	0.612	141	0.0416	0.681	22	0.0011	0.105	12	0.0548	0.0916	57	0.746	0.298	117	0.834	0.619	119	none	0.507	23	9	0.11	41	13	0.196	70	26	0.335	74	none	0.517	75	none	0.522
TBXA2R	Thromboxane A2 receptor (TXA2-R) (Prostanoid TP receptor). [Source:Uniprot/SWISSPROT;Acc:P21731]	51	0.064	0.244	80	1	0.5	26	2.89e-16	0.126	64	1	0.605	63	1	0.612	59	5.42e-05	0.285	32	181	0.153	138	none	none	63	0.76	0.33	31	0.741	0.164	33	none	0.507	61	none	0.598	85	none	0.665	138	none	0.756	138	none	0.517	138	none	0.522
ROCK1	Rho-associated protein kinase 1 (EC 2.7.11.1) (Rho-associated, coiled- coil-containing protein kinase 1) (p160 ROCK-1) (p160ROCK) (Renal carcinoma antigen NY-REN-35). [Source:Uniprot/SWISSPROT;Acc:Q13464]	52	0.0649	0.249	184	1	0.5	171	0.223	0.821	10	0.00455	0.039	7	0.00221	0.0896	147	0.0997	0.71	15	4e-11	0.0718	64	0.131	0.489	104	0.81	0.545	196	none	none	196	none	0.507	26	10	0.124	56	23	0.268	91	56.7	0.435	94	none	0.517	95	none	0.522
CAV1	Caveolin-1. [Source:Uniprot/SWISSPROT;Acc:Q03135]	53	0.0651	0.254	16	1	0.5	33	3.54e-14	0.159	68	1	0.605	65	1	0.612	96	0.00246	0.464	56	754	0.268	99	none	0.847	5	0.593	0.0262	17	0.673	0.0899	19	none	0.507	30	14.7	0.144	39	12	0.177	52	13.5	0.249	56	none	0.517	58	none	0.522
EGF	Pro-epidermal growth factor precursor (EGF) [Contains: Epidermal growth factor (Urogastrone)]. [Source:Uniprot/SWISSPROT;Acc:P01133]	54	0.0677	0.258	22	1	0.5	38	9.33e-13	0.184	32	0.487	0.156	43	1	0.612	7	8.08e-07	0.0386	24	0.455	0.115	56	0.119	0.427	146	0.863	0.764	199	none	none	199	none	0.507	27	10	0.124	38	12	0.177	122	none	0.756	124	none	0.517	125	none	0.522
LEPR|LEPROT	Leptin receptor precursor (LEP-R) (OB receptor) (OB-R) (HuB219) (CD295 antigen). [Source:Uniprot/SWISSPROT;Acc:P48357]	55	0.0725	0.263	126	1	0.5	43	7.54e-12	0.208	42	0.558	0.205	51	1	0.612	21	2.51e-06	0.101	36	291	0.172	140	none	none	164	0.883	0.859	64	0.786	0.339	66	none	0.507	19	6.5	0.0909	26	7	0.129	114	none	0.756	117	none	0.517	118	none	0.522
CELSR3|NCKIPSD|SLC26A6	SH3 adapter protein SPIN90 (NCK-interacting protein with SH3 domain) (SH3 protein interacting with Nck, 90 kDa) (VacA-interacting protein, 54 kDa) (VIP54) (AF3p21) (Diaphanous protein-interacting protein) (Dia-interacting protein 1) (DIP-1). [Source:Uniprot/SWISSPROT;Acc:Q9NZQ3]	56	0.0761	0.268	150	1	0.5	75	1.21e-08	0.362	31	0.476	0.151	143	none	none	6	6.16e-07	0.0242	23	0.002	0.11	134	none	none	135	0.852	0.707	141	0.858	0.746	143	none	0.507	17	6	0.0766	54	22	0.258	87	44	0.416	90	none	0.517	91	none	0.522
SMAD4	Mothers against decapentaplegic homolog 4 (SMAD 4) (Mothers against DPP homolog 4) (Deletion target in pancreatic carcinoma 4) (hSMAD4). [Source:Uniprot/SWISSPROT;Acc:Q13485]	57	0.0788	0.273	57	1	0.5	34	2.9e-13	0.164	69	1	0.605	14	0.00221	0.0896	148	0.106	0.715	174	none	0.679	34	0.0687	0.26	132	0.846	0.691	166	0.888	0.878	167	none	0.507	35	30	0.167	62	37.8	0.297	128	none	0.756	6	9	0.0287	9	none	0.522
PDGFA	Platelet-derived growth factor A chain precursor (PDGF A-chain) (Platelet-derived growth factor alpha polypeptide) (PDGF-1). [Source:Uniprot/SWISSPROT;Acc:P04085]	58	0.079	0.278	26	1	0.5	13	8.99e-33	0.0628	55	1	0.605	59	1	0.612	68	0.000143	0.324	112	none	0.679	167	none	none	160	0.879	0.838	82	0.801	0.434	84	none	0.507	107	none	0.598	124	none	0.665	156	none	0.756	156	none	0.517	156	none	0.522
CTNNB1	Catenin beta-1 (Beta-catenin). [Source:Uniprot/SWISSPROT;Acc:P35222]	59	0.0817	0.282	115	1	0.5	11	5.57e-35	0.0531	53	1	0.605	26	0.0785	0.201	120	0.00774	0.58	154	none	0.679	14	0.0575	0.107	41	0.723	0.215	165	0.886	0.873	166	none	0.507	34	25.7	0.163	58	24.4	0.278	103	107	0.493	106	none	0.517	107	none	0.522
SRC	Proto-oncogene tyrosine-protein kinase Src (EC 2.7.10.2) (p60-Src) (c- Src) (pp60c-src). [Source:Uniprot/SWISSPROT;Acc:P12931]	60	0.0845	0.287	45	1	0.5	77	1.96e-08	0.372	14	0.00487	0.0634	34	1	0.612	167	0.388	0.807	9	4.24e-37	0.0431	86	0.166	0.656	98	0.8	0.513	120	0.837	0.635	122	none	0.507	37	44	0.177	47	19	0.225	124	none	0.756	126	none	0.517	127	none	0.522
PRKACA	cAMP-dependent protein kinase, alpha-catalytic subunit (EC 2.7.11.11) (PKA C-alpha). [Source:Uniprot/SWISSPROT;Acc:P17612]	61	0.0873	0.292	156	1	0.5	198	0.891	0.957	11	0.00455	0.039	25	0.0785	0.201	157	0.234	0.758	14	1.9e-11	0.067	18	0.0607	0.137	89	0.793	0.466	96	0.818	0.508	98	none	0.507	120	none	0.598	66	72	0.316	131	none	0.756	131	none	0.517	131	none	0.522
S100A4	Protein S100-A4 (S100 calcium-binding protein A4) (Metastasin) (Protein Mts1) (Placental calcium-binding protein) (Calvasculin). [Source:Uniprot/SWISSPROT;Acc:P26447]	62	0.0929	0.297	169	1	0.5	192	0.6	0.913	190	1	0.605	193	none	none	166	0.376	0.792	187	none	0.679	198	none	none	8	0.604	0.0419	112	0.832	0.593	114	none	0.507	135	none	0.598	48	19	0.225	125	none	0.756	4	4	0.0144	5	4	0.0191
TH	Tyrosine 3-monooxygenase (EC 1.14.16.2) (Tyrosine 3-hydroxylase) (TH). [Source:Uniprot/SWISSPROT;Acc:P07101]	63	0.0955	0.301	9	1	0.5	25	1e-16	0.121	63	1	0.605	62	1	0.612	102	0.00357	0.493	52	653	0.249	65	0.133	0.496	188	0.94	0.984	187	0.944	0.989	187	none	0.507	192	none	0.598	193	none	0.665	84	36	0.402	87	none	0.517	88	none	0.522
TNFSF12|TNFSF13	Tumor necrosis factor ligand superfamily member 12 (TNF-related weak inducer of apoptosis) (TWEAK) (APO3 ligand) [Contains: Tumor necrosis factor ligand superfamily member 12, membrane form; Tumor necrosis factor ligand superfamily member 12, secreted for [Source:Uniprot/SWISSPROT;Acc:O43508]	64	0.0963	0.306	99	1	0.5	1	1.02e-41	0.00483	43	1	0.605	52	1	0.612	80	0.000435	0.386	123	none	0.679	80	0.151	0.611	107	0.814	0.56	135	0.853	0.714	137	none	0.507	154	none	0.598	158	none	0.665	78	30.3	0.373	82	none	0.517	83	none	0.522
MAOA	Amine oxidase [flavin-containing] A (EC 1.4.3.4) (Monoamine oxidase type A) (MAO-A). [Source:Uniprot/SWISSPROT;Acc:P21397]	65	0.0979	0.311	87	1	0.5	110	0.000349	0.531	121	1	0.605	93	1	0.612	91	0.000976	0.44	63	851	0.301	151	none	none	59	0.747	0.309	46	0.762	0.243	48	none	0.507	75	none	0.598	96	none	0.665	144	none	0.756	144	none	0.517	144	none	0.522
SMAD2	Mothers against decapentaplegic homolog 2 (SMAD 2) (Mothers against DPP homolog 2) (Mad-related protein 2) (hMAD-2) (JV18-1) (hSMAD2). [Source:Uniprot/SWISSPROT;Acc:Q15796]	66	0.106	0.316	125	1	0.5	20	2.03e-19	0.0966	60	1	0.605	11	0.00221	0.0896	119	0.00774	0.58	153	none	0.679	32	0.0681	0.244	53	0.741	0.277	88	0.811	0.466	90	none	0.507	32	23	0.153	67	79.5	0.321	132	none	0.756	132	none	0.517	132	none	0.522
HLA-DPB1	HLA class II histocompatibility antigen, DP(W4) beta chain precursor. [Source:Uniprot/SWISSPROT;Acc:P04440]	67	0.108	0.321	14	1	0.5	101	4.47e-05	0.493	36	0.531	0.18	47	1	0.612	1	1.79e-07	0.00483	76	none	0.679	158	none	none	51	0.737	0.267	76	0.798	0.402	78	none	0.507	101	none	0.598	119	none	0.665	98	80	0.469	101	none	0.517	102	none	0.522
LIMK1	LIM domain kinase 1 (EC 2.7.11.1) (LIMK-1). [Source:Uniprot/SWISSPROT;Acc:P53667]	68	0.11	0.325	153	1	0.5	65	2.81e-09	0.314	5	0.00225	0.0244	30	1	0.612	158	0.234	0.758	11	4.24e-16	0.0526	15	0.059	0.115	68	0.767	0.356	188	0.952	0.995	188	none	0.507	14	5.5	0.067	29	8	0.139	117	none	0.756	119	none	0.517	120	none	0.522
XDH	Xanthine dehydrogenase/oxidase [Includes: Xanthine dehydrogenase (EC 1.17.1.4) (XD); Xanthine oxidase (EC 1.17.3.2) (XO) (Xanthine oxidoreductase)]. [Source:Uniprot/SWISSPROT;Acc:P47989]	69	0.115	0.33	145	1	0.5	98	5.02e-06	0.473	114	1	0.605	90	1	0.612	111	0.0074	0.546	148	none	0.679	182	none	none	116	0.826	0.607	14	0.643	0.0741	16	none	0.507	52	none	0.598	78	none	0.665	134	none	0.756	134	none	0.517	134	none	0.522
MEOX2	Homeobox protein MOX-2 (Mesenchyme homeobox 2) (Growth arrest-specific homeobox). [Source:Uniprot/SWISSPROT;Acc:P50222]	70	0.116	0.335	63	1	0.5	84	2.27e-07	0.406	102	1	0.605	156	none	none	113	0.0074	0.546	149	none	0.679	78	0.149	0.595	7	0.595	0.0366	33	0.744	0.175	35	none	0.507	63	none	0.598	87	none	0.665	13	3	0.0622	19	none	0.517	21	none	0.522
PTGIS	Prostacyclin synthase (EC 5.3.99.4) (Prostaglandin I2 synthase). [Source:Uniprot/SWISSPROT;Acc:Q16647]	71	0.116	0.34	121	1	0.5	154	0.096	0.744	155	1	0.605	113	1	0.612	88	0.000639	0.425	130	none	0.679	116	none	0.847	33	0.703	0.173	10	0.615	0.0529	12	none	0.507	48	none	0.598	75	none	0.665	55	15.5	0.268	59	none	0.517	61	none	0.522
IL6	Interleukin-6 precursor (IL-6) (B-cell stimulatory factor 2) (BSF-2) (Interferon beta-2) (Hybridoma growth factor) (CTL differentiation factor) (CDF). [Source:Uniprot/SWISSPROT;Acc:P05231]	72	0.118	0.344	170	1	0.5	79	4.76e-08	0.382	98	1	0.605	80	1	0.612	55	4.77e-05	0.266	62	833	0.297	150	none	none	32	0.695	0.168	12	0.641	0.0635	14	none	0.507	50	none	0.598	76	none	0.665	22	4.85	0.105	28	none	0.517	30	none	0.522
SMAD5	Mothers against decapentaplegic homolog 5 (SMAD 5) (Mothers against DPP homolog 5) (Smad5) (hSmad5) (JV5-1). [Source:Uniprot/SWISSPROT;Acc:Q99717]	73	0.12	0.349	8	1	0.5	44	7.71e-12	0.213	75	1	0.605	16	0.00221	0.0896	184	1	0.937	68	900	0.325	91	0.189	0.695	44	0.728	0.23	72	0.791	0.381	74	none	0.507	15	6	0.0766	34	11.3	0.163	121	none	0.756	123	none	0.517	124	none	0.522
EBAG9	Receptor-binding cancer antigen expressed on SiSo cells (Cancer- associated surface antigen RCAS1) (Estrogen receptor-binding fragment- associated gene 9 protein). [Source:Uniprot/SWISSPROT;Acc:O00559]	74	0.136	0.354	160	1	0.5	106	0.000181	0.512	207	none	none	207	none	none	128	0.0105	0.614	160	none	0.679	10	0.0492	0.0763	87	0.788	0.455	48	0.763	0.254	50	none	0.507	77	none	0.598	98	none	0.665	81	32	0.388	84	none	0.517	85	none	0.522
POU5F1|POU5F1P1	POU domain, class 5, transcription factor 1 (Octamer-binding transcription factor 3) (Oct-3) (Oct-4). [Source:Uniprot/SWISSPROT;Acc:Q01860]	75	0.141	0.359	79	1	0.5	111	0.000436	0.536	122	1	0.605	164	none	none	114	0.0074	0.546	35	290	0.167	6	0.0433	0.0458	167	0.893	0.874	102	0.823	0.54	104	none	0.507	126	none	0.598	33	11	0.158	120	none	0.756	122	none	0.517	123	none	0.522
HIF1A	Hypoxia-inducible factor 1 alpha (HIF-1 alpha) (HIF1 alpha) (ARNT- interacting protein) (Member of PAS protein 1) (Basic-helix-loop- helix-PAS protein MOP1). [Source:Uniprot/SWISSPROT;Acc:Q16665]	76	0.154	0.364	4	1	0.5	10	5.3e-35	0.0483	52	1	0.605	57	1	0.612	139	0.0291	0.671	169	none	0.679	75	0.146	0.573	66	0.765	0.346	91	0.812	0.481	93	none	0.507	115	none	0.598	131	none	0.665	97	79	0.464	100	none	0.517	101	none	0.522
ESR2	Estrogen receptor beta (ER-beta). [Source:Uniprot/SWISSPROT;Acc:Q92731]	77	0.156	0.368	136	1	0.5	64	2.52e-09	0.309	90	1	0.605	153	none	none	179	0.574	0.865	194	none	0.679	202	none	none	54	0.742	0.283	150	0.865	0.794	152	none	0.507	163	none	0.598	43	15	0.201	65	20	0.311	69	none	0.517	71	none	0.522
VCAM1	Vascular cell adhesion protein 1 precursor (V-CAM 1) (CD106 antigen) (INCAM-100). [Source:Uniprot/SWISSPROT;Acc:P19320]	78	0.165	0.373	172	1	0.5	131	0.00969	0.633	39	0.531	0.18	50	1	0.612	9	8.08e-07	0.0386	27	32.6	0.129	88	0.176	0.672	29	0.688	0.152	163	0.882	0.862	164	none	0.507	172	none	0.598	175	none	0.665	185	none	0.756	185	none	0.517	185	none	0.522
CXCL10	Small inducible cytokine B10 precursor (CXCL10) (10 kDa interferon- gamma-induced protein) (Gamma-IP10) (IP-10) [Contains: CXCL10(1-73)]. [Source:Uniprot/SWISSPROT;Acc:P02778]	79	0.167	0.378	7	1	0.5	45	8.89e-12	0.217	76	1	0.605	68	1	0.612	126	0.00976	0.609	158	none	0.679	185	none	none	80	0.781	0.419	63	0.785	0.333	65	none	0.507	92	none	0.598	111	none	0.665	11	2.68	0.0526	17	none	0.517	19	none	0.522
STAT1	Signal transducer and activator of transcription 1-alpha/beta (Transcription factor ISGF-3 components p91/p84). [Source:Uniprot/SWISSPROT;Acc:P42224]	80	0.175	0.383	70	1	0.5	153	0.0839	0.739	154	1	0.605	112	1	0.612	130	0.0109	0.623	162	none	0.679	187	none	none	141	0.858	0.738	94	0.814	0.497	96	none	0.507	118	none	0.598	40	12.8	0.191	67	21.3	0.321	71	none	0.517	72	none	0.522
CYBA	Cytochrome b-245 light chain (p22 phagocyte B-cytochrome) (Neutrophil cytochrome b 22 kDa polypeptide) (p22-phox) (p22phox) (Cytochrome b(558) alpha chain) (Cytochrome b558 subunit alpha) (Superoxide- generating NADPH oxidase light chain subunit). [Source:Uniprot/SWISSPROT;Acc:P13498]	81	0.176	0.388	81	1	0.5	177	0.311	0.855	175	1	0.605	123	1	0.612	100	0.00329	0.483	37	306	0.177	141	none	none	58	0.747	0.304	73	0.794	0.386	75	none	0.507	98	none	0.598	117	none	0.665	102	88	0.488	105	none	0.517	106	none	0.522
SRD5A1	3-oxo-5-alpha-steroid 4-dehydrogenase 1 (EC 1.3.99.5) (Steroid 5- alpha-reductase 1) (SR type 1) (S5AR). [Source:Uniprot/SWISSPROT;Acc:P18405]	82	0.185	0.392	143	1	0.5	138	0.0287	0.667	142	1	0.605	105	1	0.612	104	0.00359	0.502	141	none	0.679	180	none	none	101	0.804	0.529	87	0.81	0.46	89	none	0.507	112	none	0.598	128	none	0.665	60	16	0.282	64	none	0.517	66	none	0.522
SERPINA1	Alpha-1-antitrypsin precursor (Alpha-1 protease inhibitor) (Alpha-1- antiproteinase). [Source:Uniprot/SWISSPROT;Acc:P01009]	83	0.186	0.397	41	1	0.5	185	0.6	0.913	183	1	0.605	129	1	0.612	40	2.01e-05	0.188	26	23.1	0.124	76	0.146	0.58	198	none	none	179	0.9	0.947	179	none	0.507	184	none	0.598	186	none	0.665	41	9.86	0.196	47	none	0.517	49	none	0.522
HSPA5	78 kDa glucose-regulated protein precursor (GRP 78) (Heat shock 70 kDa protein 5) (Immunoglobulin heavy chain-binding protein) (BiP) (Endoplasmic reticulum lumenal Ca(2+)-binding protein grp78). [Source:Uniprot/SWISSPROT;Acc:P11021]	84	0.193	0.402	118	1	0.5	136	0.0214	0.657	140	1	0.605	104	1	0.612	89	0.000685	0.43	131	none	0.679	27	0.0655	0.206	194	none	none	80	0.799	0.423	82	none	0.507	105	none	0.598	122	none	0.665	155	none	0.756	155	none	0.517	155	none	0.522
TRPC6	Short transient receptor potential channel 6 (TrpC6). [Source:Uniprot/SWISSPROT;Acc:Q9Y210]	85	0.198	0.407	138	1	0.5	115	0.00107	0.556	21	0.323	0.102	139	none	none	62	7.52e-05	0.3	109	none	0.679	81	0.153	0.618	156	0.875	0.817	42	0.758	0.222	44	none	0.507	72	none	0.598	11	3.5	0.0526	69	26	0.335	73	none	0.517	74	none	0.522
HTR2B	5-hydroxytryptamine 2B receptor (5-HT-2B) (Serotonin receptor 2B). [Source:Uniprot/SWISSPROT;Acc:P41595]	86	0.204	0.411	2	1	0.5	18	2.38e-20	0.087	59	1	0.605	60	1	0.612	82	0.000518	0.401	125	none	0.679	115	none	0.847	169	0.895	0.885	133	0.852	0.704	135	none	0.507	152	none	0.598	156	none	0.665	6	2.22	0.0287	12	none	0.517	14	none	0.522
PPARG	Peroxisome proliferator-activated receptor gamma (PPAR-gamma). [Source:Uniprot/SWISSPROT;Acc:P37231]	87	0.209	0.416	77	1	0.5	105	0.00014	0.507	117	1	0.605	92	1	0.612	134	0.0176	0.647	164	none	0.679	188	none	none	117	0.828	0.613	160	0.879	0.847	162	none	0.507	171	none	0.598	174	none	0.665	184	none	0.756	184	none	0.517	184	none	0.522
TNF	Tumor necrosis factor precursor (TNF-alpha) (Tumor necrosis factor ligand superfamily member 2) (TNF-a) (Cachectin) [Contains: Tumor necrosis factor, membrane form; Tumor necrosis factor, soluble form]. [Source:Uniprot/SWISSPROT;Acc:P01375]	88	0.209	0.421	195	none	none	49	1.32e-11	0.237	80	1	0.605	17	0.00221	0.0896	94	0.00136	0.454	135	none	0.679	52	0.108	0.397	122	0.835	0.639	68	0.788	0.36	70	none	0.507	95	none	0.598	114	none	0.665	72	27.3	0.344	76	none	0.517	77	none	0.522
VIPR2	Vasoactive intestinal polypeptide receptor 2 precursor (VIP-R-2) (Pituitary adenylate cyclase-activating polypeptide type III receptor) (PACAP type III receptor) (PACAP-R-3) (Helodermin-preferring VIP receptor). [Source:Uniprot/SWISSPROT;Acc:P41587]	89	0.211	0.426	148	1	0.5	54	4.78e-10	0.261	84	1	0.605	72	1	0.612	4	6.16e-07	0.0242	78	none	0.679	159	none	none	185	0.93	0.969	90	0.811	0.476	92	none	0.507	114	none	0.598	130	none	0.665	158	none	0.756	158	none	0.517	158	none	0.522
CASP8	Caspase-8 precursor (EC 3.4.22.-) (CASP-8) (ICE-like apoptotic protease 5) (MORT1-associated CED-3 homolog) (MACH) (FADD-homologous ICE/CED-3-like protease) (FADD-like ICE) (FLICE) (Apoptotic cysteine protease) (Apoptotic protease Mch-5) (CAP4) [Contains: [Source:Uniprot/SWISSPROT;Acc:Q14790]	90	0.214	0.431	19	1	0.5	12	7.37e-35	0.058	54	1	0.605	58	1	0.612	129	0.0109	0.623	161	none	0.679	186	none	none	162	0.88	0.848	107	0.827	0.566	109	none	0.507	130	none	0.598	65	66	0.311	130	none	0.756	130	none	0.517	130	none	0.522
STAT3	Signal transducer and activator of transcription 3 (Acute-phase response factor). [Source:Uniprot/SWISSPROT;Acc:P40763]	91	0.223	0.435	21	1	0.5	89	3.72e-07	0.43	107	1	0.605	86	1	0.612	110	0.0074	0.546	147	none	0.679	121	none	0.847	170	0.897	0.89	138	0.855	0.73	140	none	0.507	33	23.5	0.158	49	19.2	0.234	83	34.5	0.397	86	none	0.517	87	none	0.522
GDF15	Growth/differentiation factor 15 precursor (GDF-15) (Placental bone morphogenetic protein) (Placental TGF-beta) (Macrophage inhibitory cytokine 1) (MIC-1) (Prostate differentiation factor) (NSAID-regulated protein 1) (NRG-1). [Source:Uniprot/SWISSPROT;Acc:Q99988]	92	0.228	0.44	98	1	0.5	97	4.5e-06	0.469	113	1	0.605	159	none	none	30	1.23e-05	0.14	91	none	0.679	106	none	0.847	110	0.82	0.576	32	0.743	0.169	34	none	0.507	62	none	0.598	86	none	0.665	24	5.23	0.115	30	none	0.517	32	none	0.522
CX3CR1	CX3C chemokine receptor 1 (C-X3-C CKR-1) (CX3CR1) (Fractalkine receptor) (G-protein coupled receptor 13) (V28) (Beta chemokine receptor-like 1) (CMK-BRL-1) (CMKBLR1). [Source:Uniprot/SWISSPROT;Acc:P49238]	93	0.233	0.445	140	1	0.5	71	6.7e-09	0.343	93	1	0.605	76	1	0.612	90	0.000865	0.435	132	none	0.679	174	none	none	42	0.725	0.22	169	0.891	0.894	170	none	0.507	176	none	0.598	179	none	0.665	90	56.5	0.431	93	none	0.517	94	none	0.522
MMP3	Stromelysin-1 precursor (EC 3.4.24.17) (Matrix metalloproteinase-3) (MMP-3) (Transin-1) (SL-1). [Source:Uniprot/SWISSPROT;Acc:P08254]	94	0.235	0.45	67	1	0.5	125	0.00444	0.604	26	0.411	0.122	142	none	none	74	0.000171	0.353	118	none	0.679	170	none	none	186	0.933	0.974	27	0.733	0.143	29	none	0.507	58	none	0.598	82	none	0.665	32	7.5	0.153	38	none	0.517	40	none	0.522
CDC25A	M-phase inducer phosphatase 1 (EC 3.1.3.48) (Dual specificity phosphatase Cdc25A). [Source:Uniprot/SWISSPROT;Acc:P30304]	95	0.246	0.455	186	1	0.5	176	0.287	0.85	174	1	0.605	122	1	0.612	137	0.0202	0.657	167	none	0.679	29	0.0675	0.221	111	0.821	0.581	134	0.852	0.709	136	none	0.507	153	none	0.598	157	none	0.665	175	none	0.756	175	none	0.517	175	none	0.522
MMP1	Interstitial collagenase precursor (EC 3.4.24.7) (Matrix metalloproteinase-1) (MMP-1) (Fibroblast collagenase) [Contains: 22 kDa interstitial collagenase; 27 kDa interstitial collagenase]. [Source:Uniprot/SWISSPROT;Acc:P03956]	96	0.248	0.459	85	1	0.5	126	0.00444	0.604	27	0.411	0.122	39	1	0.612	73	0.000171	0.353	117	none	0.679	30	0.0679	0.229	191	0.959	1	11	0.639	0.0582	13	none	0.507	49	none	0.598	44	17	0.211	40	9.5	0.191	46	none	0.517	48	none	0.522
ESRRA	Steroid hormone receptor ERR1 (Estrogen-related receptor, alpha) (ERR- alpha) (Estrogen receptor-like 1). [Source:Uniprot/SWISSPROT;Acc:P11474]	97	0.258	0.464	109	1	0.5	167	0.175	0.807	167	1	0.605	184	none	none	178	0.506	0.86	193	none	0.679	1	0.0371	0.00763	12	0.623	0.0628	110	0.829	0.582	112	none	0.507	133	none	0.598	143	none	0.665	166	none	0.756	166	none	0.517	166	none	0.522
SMURF1	Smad ubiquitination regulatory factor 1 (EC 6.3.2.-) (Ubiquitin-- protein ligase SMURF1) (Smad-specific E3 ubiquitin ligase 1) (hSMURF1). [Source:Uniprot/SWISSPROT;Acc:Q9HCE7]	98	0.261	0.469	133	1	0.5	42	4.93e-12	0.203	74	1	0.605	15	0.00221	0.0896	183	1	0.937	59	805	0.282	47	0.0853	0.359	50	0.736	0.262	36	0.751	0.19	38	none	0.507	66	none	0.598	90	none	0.665	140	none	0.756	140	none	0.517	140	none	0.522
TNFSF10	Tumor necrosis factor ligand superfamily member 10 (TNF-related apoptosis-inducing ligand) (Protein TRAIL) (Apo-2 ligand) (Apo-2L) (CD253 antigen). [Source:Uniprot/SWISSPROT;Acc:P50591]	99	0.263	0.474	25	1	0.5	83	7.48e-08	0.401	101	1	0.605	83	1	0.612	123	0.00779	0.594	65	879	0.311	152	none	none	85	0.788	0.445	155	0.874	0.82	157	none	0.507	166	none	0.598	169	none	0.665	99	80	0.469	102	none	0.517	103	none	0.522
ESRRG	Estrogen-related receptor gamma (Estrogen receptor-related protein 3) (ERR gamma-2). [Source:Uniprot/SWISSPROT;Acc:P62508]	100	0.268	0.478	93	1	0.5	118	0.0014	0.57	127	1	0.605	167	none	none	142	0.0477	0.686	171	none	0.679	191	none	none	154	0.869	0.806	101	0.822	0.534	103	none	0.507	125	none	0.598	137	none	0.665	161	none	0.756	161	none	0.517	161	none	0.522
HMOX1	Heme oxygenase 1 (EC 1.14.99.3) (HO-1). [Source:Uniprot/SWISSPROT;Acc:P09601]	101	0.269	0.483	127	1	0.5	140	0.0322	0.676	143	1	0.605	106	1	0.612	135	0.0202	0.657	165	none	0.679	189	none	none	62	0.76	0.325	47	0.763	0.249	49	none	0.507	76	none	0.598	97	none	0.665	145	none	0.756	145	none	0.517	145	none	0.522
HGF	Hepatocyte growth factor precursor (Scatter factor) (SF) (Hepatopoeitin-A) [Contains: Hepatocyte growth factor alpha chain; Hepatocyte growth factor beta chain]. [Source:Uniprot/SWISSPROT;Acc:P14210]	102	0.269	0.488	46	1	0.5	92	6.33e-07	0.444	110	1	0.605	88	1	0.612	41	2.02e-05	0.198	97	none	0.679	90	0.187	0.687	161	0.879	0.843	38	0.755	0.201	40	none	0.507	68	none	0.598	91	none	0.665	58	16	0.282	62	none	0.517	64	none	0.522
TRPC4	Short transient receptor potential channel 4 (TrpC4) (Trp-related protein 4) (hTrp-4) (hTrp4). [Source:Uniprot/SWISSPROT;Acc:Q9UBN4]	103	0.273	0.493	86	1	0.5	119	0.00162	0.575	22	0.323	0.102	140	none	none	127	0.0105	0.614	159	none	0.679	68	0.138	0.519	112	0.822	0.586	114	0.833	0.603	116	none	0.507	136	none	0.598	31	9	0.148	119	none	0.756	121	none	0.517	122	none	0.522
FHL1	Four and a half LIM domains protein 1 (FHL-1) (Skeletal muscle LIM- protein 1) (SLIM 1) (SLIM). [Source:Uniprot/SWISSPROT;Acc:Q13642]	104	0.276	0.498	38	1	0.5	41	2.06e-12	0.198	73	1	0.605	149	none	none	164	0.376	0.792	185	none	0.679	33	0.0686	0.252	34	0.706	0.178	50	0.773	0.265	52	none	0.507	79	none	0.598	99	none	0.665	76	28	0.359	80	none	0.517	81	none	0.522
LEP	Leptin precursor (Obesity factor) (Obese protein). [Source:Uniprot/SWISSPROT;Acc:P41159]	105	0.277	0.502	103	1	0.5	85	2.85e-07	0.411	103	1	0.605	84	1	0.612	75	0.000235	0.362	119	none	0.679	112	none	0.847	90	0.794	0.471	57	0.779	0.302	59	none	0.507	86	none	0.598	105	none	0.665	68	24	0.325	72	none	0.517	73	none	0.522
CD226	CD226 antigen precursor (DNAX accessory molecule 1) (DNAM-1). [Source:Uniprot/SWISSPROT;Acc:Q15762]	106	0.28	0.507	102	1	0.5	63	2.4e-09	0.304	34	0.531	0.18	45	1	0.612	11	1.09e-06	0.0531	33	219	0.158	139	none	none	171	0.898	0.895	132	0.85	0.698	134	none	0.507	151	none	0.598	19	5	0.0909	111	none	0.756	114	none	0.517	115	none	0.522
PDGFRL	Platelet-derived growth factor receptor-like protein precursor (PDGF receptor beta-like tumor suppressor). [Source:Uniprot/SWISSPROT;Acc:Q15198]	107	0.286	0.512	88	1	0.5	139	0.0288	0.671	40	0.531	0.18	144	none	none	60	6.59e-05	0.29	28	106	0.134	136	none	none	79	0.78	0.414	83	0.804	0.439	85	none	0.507	108	none	0.598	125	none	0.665	157	none	0.756	157	none	0.517	157	none	0.522
IRF4	Interferon regulatory factor 4 (IRF-4) (Lymphocyte-specific interferon regulatory factor) (LSIRF) (NF-EM5) (Multiple myeloma oncogene 1). [Source:Uniprot/SWISSPROT;Acc:Q15306]	108	0.289	0.517	30	1	0.5	88	3.44e-07	0.42	106	1	0.605	157	none	none	174	0.4	0.831	191	none	0.679	61	0.125	0.466	129	0.845	0.675	34	0.747	0.18	36	none	0.507	64	none	0.598	88	none	0.665	86	42	0.411	89	none	0.517	90	none	0.522
NFATC2	Nuclear factor of activated T-cells, cytoplasmic 2 (T cell transcription factor NFAT1) (NFAT pre-existing subunit) (NF-ATp). [Source:Uniprot/SWISSPROT;Acc:Q13469]	109	0.296	0.522	207	none	none	129	0.00666	0.623	135	1	0.605	100	1	0.612	172	0.4	0.831	189	none	0.679	199	none	none	70	0.767	0.366	194	none	none	194	none	0.507	196	none	0.598	196	none	0.665	196	none	0.756	196	none	0.517	196	none	0.522
GUCY1B3	Guanylate cyclase soluble subunit beta-1 (EC 4.6.1.2) (GCS-beta-1) (Soluble guanylate cyclase small subunit) (GCS-beta-3). [Source:Uniprot/SWISSPROT;Acc:Q02153]	110	0.296	0.526	43	1	0.5	80	4.98e-08	0.386	99	1	0.605	81	1	0.612	161	0.302	0.778	182	none	0.679	130	none	0.847	86	0.788	0.45	146	0.861	0.772	148	none	0.507	160	none	0.598	164	none	0.665	37	8.83	0.177	43	none	0.517	45	none	0.522
HSD17B2	Estradiol 17-beta-dehydrogenase 2 (EC 1.1.1.62) (17-beta-HSD 2) (Microsomal 17-beta-hydroxysteroid dehydrogenase) (20 alpha- hydroxysteroid dehydrogenase) (20-alpha-HSD) (E2DH). [Source:Uniprot/SWISSPROT;Acc:P37059]	111	0.301	0.531	23	1	0.5	147	0.0699	0.715	148	1	0.605	108	1	0.612	78	0.000285	0.372	121	none	0.679	171	none	none	94	0.798	0.492	51	0.774	0.27	53	none	0.507	80	none	0.598	100	none	0.665	80	31	0.378	83	none	0.517	84	none	0.522
CYP1B1	Cytochrome P450 1B1 (EC 1.14.14.1) (CYPIB1). [Source:Uniprot/SWISSPROT;Acc:Q16678]	112	0.302	0.536	168	1	0.5	132	0.011	0.638	137	1	0.605	102	1	0.612	93	0.00115	0.449	134	none	0.679	176	none	none	144	0.86	0.754	177	0.896	0.937	177	none	0.507	182	none	0.598	184	none	0.665	188	none	0.756	188	none	0.517	188	none	0.522
IL13RA2	Interleukin-13 receptor alpha-2 chain precursor (Interleukin-13- binding protein) (CD213a2 antigen). [Source:Uniprot/SWISSPROT;Acc:Q14627]	113	0.305	0.541	101	1	0.5	172	0.23	0.831	171	1	0.605	121	1	0.612	5	6.16e-07	0.0242	58	793	0.278	148	none	none	113	0.823	0.592	105	0.824	0.556	107	none	0.507	128	none	0.598	139	none	0.665	71	26	0.335	75	none	0.517	76	none	0.522
CASP9	Caspase-9 precursor (EC 3.4.22.-) (CASP-9) (ICE-like apoptotic protease 6) (ICE-LAP6) (Apoptotic protease Mch-6) (Apoptotic protease- activating factor 3) (APAF-3) [Contains: Caspase-9 subunit p35; Caspase-9 subunit p10]. [Source:Uniprot/SWISSPROT;Acc:P55211]	114	0.307	0.545	20	1	0.5	151	0.0816	0.729	152	1	0.605	111	1	0.612	136	0.0202	0.657	166	none	0.679	126	none	0.847	143	0.86	0.749	162	0.882	0.857	1	5	0.00478	41	none	0.598	45	17.5	0.215	123	none	0.756	125	none	0.517	126	none	0.522
ESR1	Estrogen receptor (ER) (Estradiol receptor) (ER-alpha). [Source:Uniprot/SWISSPROT;Acc:P03372]	115	0.312	0.55	122	1	0.5	108	0.000241	0.522	119	1	0.605	162	none	none	145	0.0569	0.7	173	none	0.679	193	none	none	178	0.915	0.932	172	0.892	0.91	172	none	0.507	39	71	0.187	60	27.3	0.287	95	71	0.455	98	none	0.517	99	none	0.522
ID2	DNA-binding protein inhibitor ID-2 (Inhibitor of DNA binding 2). [Source:Uniprot/SWISSPROT;Acc:Q02363]	116	0.322	0.555	64	1	0.5	91	5.4e-07	0.435	109	1	0.605	21	0.00221	0.0896	186	1	0.937	31	167	0.148	55	0.117	0.42	168	0.894	0.88	139	0.856	0.735	141	none	0.507	155	none	0.598	159	none	0.665	53	13.5	0.249	57	none	0.517	59	none	0.522
VANGL1	Vang-like protein 1 (Van Gogh-like protein 1) (Strabismus 2) (Loop- tail protein 2 homolog) (LPP2). [Source:Uniprot/SWISSPROT;Acc:Q8TAA9]	117	0.322	0.56	149	1	0.5	117	0.00129	0.565	126	1	0.605	95	1	0.612	77	0.000285	0.372	120	none	0.679	19	0.0612	0.145	61	0.759	0.319	44	0.76	0.233	46	none	0.507	74	none	0.598	95	none	0.665	143	none	0.756	143	none	0.517	143	none	0.522
APOE	Apolipoprotein E precursor (Apo-E). [Source:Uniprot/SWISSPROT;Acc:P02649]	118	0.328	0.565	40	1	0.5	39	1.04e-12	0.188	72	1	0.605	67	1	0.612	39	2.01e-05	0.188	96	none	0.679	45	0.0762	0.344	137	0.854	0.717	159	0.876	0.841	161	none	0.507	170	none	0.598	173	none	0.665	21	4.78	0.1	27	none	0.517	29	none	0.522
IL13	Interleukin-13 precursor (IL-13). [Source:Uniprot/SWISSPROT;Acc:P35225]	119	0.329	0.569	173	1	0.5	161	0.152	0.778	162	1	0.605	116	1	0.612	46	2.89e-05	0.217	100	none	0.679	108	none	0.847	121	0.833	0.634	103	0.823	0.545	105	none	0.507	16	6	0.0766	23	6	0.11	113	none	0.756	116	none	0.517	117	none	0.522
GUCY1A3	Guanylate cyclase soluble subunit alpha-3 (EC 4.6.1.2) (GCS-alpha-3) (Soluble guanylate cyclase large subunit) (GCS-alpha-1). [Source:Uniprot/SWISSPROT;Acc:Q02108]	120	0.354	0.574	10	1	0.5	76	1.47e-08	0.367	96	1	0.605	78	1	0.612	187	1	0.937	196	none	0.679	204	none	none	71	0.77	0.372	145	0.859	0.767	147	none	0.507	159	none	0.598	163	none	0.665	12	2.73	0.0574	18	none	0.517	20	none	0.522
CXCR6	C-X-C chemokine receptor type 6 (CXC-R6) (CXCR-6) (G-protein coupled receptor bonzo) (G-protein coupled receptor STRL33) (CD186 antigen) (CDw186). [Source:Uniprot/SWISSPROT;Acc:O00574]	121	0.355	0.579	94	1	0.5	60	1.18e-09	0.29	88	1	0.605	74	1	0.612	50	4.47e-05	0.237	103	none	0.679	165	none	none	81	0.785	0.424	178	0.899	0.942	178	none	0.507	183	none	0.598	185	none	0.665	189	none	0.756	189	none	0.517	189	none	0.522
HMGCR	3-hydroxy-3-methylglutaryl-coenzyme A reductase (EC 1.1.1.34) (HMG-CoA reductase). [Source:Uniprot/SWISSPROT;Acc:P04035]	122	0.358	0.584	18	1	0.5	78	4.15e-08	0.377	97	1	0.605	79	1	0.612	47	3.29e-05	0.227	101	none	0.679	84	0.155	0.641	48	0.734	0.251	97	0.819	0.513	99	none	0.507	121	none	0.598	134	none	0.665	101	85	0.483	104	none	0.517	105	none	0.522
SMAD9	Mothers against decapentaplegic homolog 9 (SMAD 9) (Mothers against DPP homolog 9) (Smad9) (Madh6). [Source:Uniprot/SWISSPROT;Acc:O15198]	123	0.36	0.589	12	1	0.5	87	3.44e-07	0.42	105	1	0.605	20	0.00221	0.0896	185	1	0.937	47	502	0.225	144	none	none	204	none	none	151	0.867	0.799	153	none	0.507	36	43	0.172	64	54	0.306	129	none	0.756	129	none	0.517	8	78	0.0383
FOS	Proto-oncogene protein c-fos (Cellular oncogene fos) (G0/G1 switch regulatory protein 7). [Source:Uniprot/SWISSPROT;Acc:P01100]	124	0.367	0.593	100	1	0.5	99	1.62e-05	0.478	115	1	0.605	91	1	0.612	170	0.4	0.831	34	232	0.163	36	0.0698	0.275	174	0.903	0.911	93	0.813	0.492	95	none	0.507	117	none	0.598	132	none	0.665	82	33.5	0.392	85	none	0.517	86	none	0.522
HSD17B10	3-hydroxyacyl-CoA dehydrogenase type-2 (EC 1.1.1.35) (3-hydroxyacyl- CoA dehydrogenase type II) (Type II HADH) (3-hydroxy-2-methylbutyryl- CoA dehydrogenase) (EC 1.1.1.178) (Endoplasmic reticulum-associated amyloid beta-peptide-binding protein) (Short-cha [Source:Uniprot/SWISSPROT;Acc:Q99714]	125	0.37	0.598	82	1	0.5	133	0.0121	0.643	138	1	0.605	103	1	0.612	149	0.106	0.715	175	none	0.679	127	none	0.847	155	0.872	0.812	66	0.786	0.349	68	none	0.507	94	none	0.598	113	none	0.665	92	57	0.44	95	none	0.517	96	none	0.522
WNT5A	Protein Wnt-5a precursor. [Source:Uniprot/SWISSPROT;Acc:P41221]	126	0.37	0.603	120	1	0.5	57	8.16e-10	0.275	85	1	0.605	29	0.0785	0.201	67	0.000143	0.324	29	107	0.139	62	0.127	0.473	163	0.881	0.853	201	none	none	201	none	0.507	201	none	0.598	201	none	0.665	201	none	0.756	201	none	0.517	201	none	0.522
TRPC3	Short transient receptor potential channel 3 (TrpC3) (Htrp-3) (Htrp3). [Source:Uniprot/SWISSPROT;Acc:Q13507]	127	0.374	0.608	116	1	0.5	55	5.53e-10	0.266	20	0.323	0.102	138	none	none	84	0.000518	0.401	127	none	0.679	69	0.14	0.527	148	0.864	0.775	92	0.813	0.487	94	none	0.507	116	none	0.598	51	21	0.244	126	none	0.756	127	none	0.517	128	none	0.522
GDF2	Growth/differentiation factor 2 precursor (GDF-2) (Bone morphogenetic protein 9) (BMP-9). [Source:Uniprot/SWISSPROT;Acc:Q9UK05]	128	0.38	0.612	128	1	0.5	188	0.6	0.913	186	1	0.605	191	none	none	79	0.000335	0.382	122	none	0.679	113	none	0.847	202	none	none	104	0.823	0.55	106	none	0.507	127	none	0.598	138	none	0.665	162	none	0.756	162	none	0.517	162	none	0.522
PCBP4	Poly(rC)-binding protein 4 (Alpha-CP4). [Source:Uniprot/SWISSPROT;Acc:P57723]	129	0.401	0.617	35	1	0.5	155	0.105	0.749	156	1	0.605	177	none	none	200	1	0.937	205	none	0.679	8	0.0452	0.0611	193	none	none	140	0.856	0.741	142	none	0.507	156	none	0.598	160	none	0.665	176	none	0.756	176	none	0.517	176	none	0.522
MST1	Hepatocyte growth factor-like protein precursor (Macrophage stimulatory protein) (MSP) (Macrophage-stimulating protein) [Contains: Hepatocyte growth factor-like protein alpha chain; Hepatocyte growth factor-like protein beta chain]. [Source:Uniprot/SWISSPROT;Acc:P26927]	130	0.404	0.622	104	1	0.5	128	0.00656	0.618	134	1	0.605	170	none	none	57	4.77e-05	0.266	107	none	0.679	110	none	0.847	84	0.787	0.44	183	0.912	0.968	183	none	0.507	188	none	0.598	190	none	0.665	36	8.6	0.172	42	none	0.517	44	none	0.522
HSD17B12	Estradiol 17-beta-dehydrogenase 12 (EC 1.1.1.62) (17-beta-HSD 12) (17- beta-hydroxysteroid dehydrogenase 12) (3-ketoacyl-CoA reductase) (EC 1.3.1.-) (KAR). [Source:Uniprot/SWISSPROT;Acc:Q53GQ0]	131	0.407	0.627	52	1	0.5	148	0.0699	0.715	149	1	0.605	109	1	0.612	81	0.00051	0.391	124	none	0.679	114	none	0.847	75	0.774	0.393	126	0.842	0.667	128	none	0.507	145	none	0.598	151	none	0.665	172	none	0.756	172	none	0.517	172	none	0.522
CCRL1	C-C chemokine receptor type 11 (C-C CKR-11) (CC-CKR-11) (CCR-11) (CC chemokine receptor-like 1) (CCRL1) (CCX CKR). [Source:Uniprot/SWISSPROT;Acc:Q9NPB9]	132	0.416	0.632	187	1	0.5	62	1.18e-09	0.29	89	1	0.605	152	none	none	85	0.000518	0.401	128	none	0.679	173	none	none	43	0.726	0.225	115	0.833	0.608	117	none	0.507	137	none	0.598	145	none	0.665	168	none	0.756	168	none	0.517	168	none	0.522
HLA-DRB1	HLA class II histocompatibility antigen, DRB1-1 beta chain precursor (MHC class I antigen DRB1*1) (DR-1) (DR1). [Source:Uniprot/SWISSPROT;Acc:P04229]	133	0.419	0.636	55	1	0.5	66	2.94e-09	0.319	35	0.531	0.18	46	1	0.612	8	8.08e-07	0.0386	79	none	0.679	102	none	0.847	26	0.681	0.136	62	0.784	0.328	64	none	0.507	91	none	0.598	110	none	0.665	149	none	0.756	149	none	0.517	149	none	0.522
PCDH20	Protocadherin-20 precursor (Protocadherin-13). [Source:Uniprot/SWISSPROT;Acc:Q8N6Y1]	134	0.419	0.641	175	1	0.5	174	0.241	0.836	172	1	0.605	185	none	none	19	1.97e-06	0.087	71	932	0.34	60	0.125	0.458	149	0.864	0.78	200	none	none	200	none	0.507	200	none	0.598	200	none	0.665	200	none	0.756	200	none	0.517	200	none	0.522
RHOA	Transforming protein RhoA precursor (H12). [Source:Uniprot/SWISSPROT;Acc:P61586]	135	0.426	0.646	74	1	0.5	143	0.035	0.691	145	1	0.605	22	0.00221	0.0896	151	0.145	0.729	49	556	0.234	98	none	0.847	19	0.656	0.0995	25	0.73	0.132	27	none	0.507	38	47	0.182	53	21.7	0.254	105	127	0.502	108	none	0.517	109	none	0.522
FOSL2	Fos-related antigen 2. [Source:Uniprot/SWISSPROT;Acc:P15408]	136	0.43	0.651	32	1	0.5	162	0.152	0.783	163	1	0.605	181	none	none	203	1	0.937	206	none	0.679	43	0.0741	0.328	96	0.8	0.503	70	0.79	0.37	72	none	0.507	96	none	0.598	115	none	0.665	150	none	0.756	150	none	0.517	150	none	0.522
CCR1	C-C chemokine receptor type 1 (C-C CKR-1) (CC-CKR-1) (CCR-1) (CCR1) (Macrophage inflammatory protein 1-alpha receptor) (MIP-1alpha-R) (RANTES-R) (HM145) (LD78 receptor) (CD191 antigen). [Source:Uniprot/SWISSPROT;Acc:P32246]	137	0.431	0.656	97	1	0.5	73	9.36e-09	0.353	95	1	0.605	77	1	0.612	83	0.000518	0.401	126	none	0.679	172	none	none	27	0.685	0.141	176	0.895	0.931	176	none	0.507	181	none	0.598	183	none	0.665	74	27.8	0.354	78	none	0.517	79	none	0.522
HSD17B4	Peroxisomal multifunctional enzyme type 2 (MFE-2) (D-bifunctional protein) (DBP) (17-beta-hydroxysteroid dehydrogenase 4) (17-beta-HSD 4) (D-3-hydroxyacyl-CoA dehydratase) (EC 4.2.1.107) (3-alpha,7- alpha,12-alpha-trihydroxy-5-beta-cholest-24-enoyl-CoA hy [Source:Uniprot/SWISSPROT;Acc:P51659]	138	0.435	0.66	171	1	0.5	180	0.44	0.87	178	1	0.605	125	1	0.612	121	0.00774	0.58	155	none	0.679	183	none	none	95	0.798	0.497	78	0.798	0.413	80	none	0.507	103	none	0.598	120	none	0.665	153	none	0.756	153	none	0.517	153	none	0.522
HAS2	Hyaluronan synthase 2 (EC 2.4.1.212) (Hyaluronate synthase 2) (Hyaluronic acid synthase 2) (HA synthase 2). [Source:Uniprot/SWISSPROT;Acc:Q92819]	139	0.438	0.665	60	1	0.5	69	6.47e-09	0.333	92	1	0.605	154	none	none	125	0.00805	0.604	157	none	0.679	184	none	none	126	0.841	0.66	143	0.858	0.757	145	none	0.507	157	none	0.598	161	none	0.665	177	none	0.756	177	none	0.517	177	none	0.522
CCR7	C-C chemokine receptor type 7 precursor (C-C CKR-7) (CC-CKR-7) (CCR-7) (MIP-3 beta receptor) (EBV-induced G-protein coupled receptor 1) (EBI1) (BLR2) (CD197 antigen) (CDw197). [Source:Uniprot/SWISSPROT;Acc:P32248]	140	0.446	0.67	31	1	0.5	58	8.98e-10	0.28	86	1	0.605	73	1	0.612	26	6.9e-06	0.121	88	none	0.679	105	none	0.847	189	0.945	0.99	128	0.846	0.677	130	none	0.507	147	none	0.598	153	none	0.665	94	68	0.45	97	none	0.517	98	none	0.522
PPARGC1A	Peroxisome proliferator-activated receptor gamma coactivator 1-alpha (PPAR gamma coactivator 1-alpha) (PPARGC-1-alpha) (PGC-1-alpha) (Ligand effect modulator 6). [Source:Uniprot/SWISSPROT;Acc:Q9UBK2]	141	0.45	0.675	1	1	0.5	120	0.00203	0.58	128	1	0.605	96	1	0.612	112	0.0074	0.546	45	468	0.215	66	0.135	0.504	18	0.656	0.0942	175	0.895	0.926	175	none	0.507	180	none	0.598	182	none	0.665	187	none	0.756	187	none	0.517	187	none	0.522
HLA-DQB1	HLA class II histocompatibility antigen, DQ(1) beta chain precursor (DC-3 beta chain). [Source:Uniprot/SWISSPROT;Acc:P01918]	142	0.459	0.679	189	none	none	102	4.47e-05	0.493	37	0.531	0.18	48	1	0.612	22	4e-06	0.106	51	579	0.244	146	none	none	30	0.693	0.157	41	0.758	0.217	43	none	0.507	71	none	0.598	93	none	0.665	142	none	0.756	142	none	0.517	142	none	0.522
PDK2	[Pyruvate dehydrogenase [lipoamide]] kinase isozyme 2, mitochondrial precursor (EC 2.7.11.2) (Pyruvate dehydrogenase kinase isoform 2). [Source:Uniprot/SWISSPROT;Acc:Q15119]	143	0.46	0.684	179	1	0.5	199	0.891	0.957	196	1	0.605	199	none	none	155	0.205	0.744	180	none	0.679	77	0.148	0.588	76	0.777	0.398	89	0.811	0.471	91	none	0.507	113	none	0.598	129	none	0.665	43	10.5	0.206	48	none	0.517	50	none	0.522
DNM1L	Dynamin-1-like protein (EC 3.6.5.5) (Dynamin-like protein) (Dnm1p/Vps1p-like protein) (DVLP) (Dynamin family member proline-rich carboxyl-terminal domain less) (Dymple) (Dynamin-related protein 1) (Dynamin-like protein 4) (Dynamin-like protein IV) (HdynIV [Source:Uniprot/SWISSPROT;Acc:O00429]	144	0.463	0.689	161	1	0.5	112	0.000691	0.541	123	1	0.605	165	none	none	107	0.00656	0.517	144	none	0.679	181	none	none	124	0.838	0.649	74	0.797	0.392	76	none	0.507	99	none	0.598	118	none	0.665	152	none	0.756	152	none	0.517	152	none	0.522
GNB2L1	Guanine nucleotide-binding protein subunit beta 2-like 1 (Guanine nucleotide-binding protein subunit beta-like protein 12.3) (Receptor of activated protein kinase C 1) (RACK1) (Receptor for activated C kinase). [Source:Uniprot/SWISSPROT;Acc:P63244]	145	0.465	0.694	199	none	none	123	0.00347	0.594	131	1	0.605	169	none	none	162	0.302	0.778	183	none	0.679	197	none	none	151	0.868	0.791	49	0.763	0.259	51	none	0.507	78	none	0.598	32	10	0.153	89	54.5	0.426	92	none	0.517	93	none	0.522
CYP19A1	Cytochrome P450 19A1 (EC 1.14.14.1) (Aromatase) (CYPXIX) (Estrogen synthetase) (P-450AROM). [Source:Uniprot/SWISSPROT;Acc:P11511]	146	0.479	0.699	73	1	0.5	183	0.543	0.884	181	1	0.605	127	1	0.612	101	0.00329	0.483	139	none	0.679	178	none	none	179	0.918	0.937	58	0.78	0.307	60	none	0.507	87	none	0.598	106	none	0.665	47	12.3	0.225	51	none	0.517	53	none	0.522
HLA-DRB5	HLA class II histocompatibility antigen, DRB1-9 beta chain precursor (MHC class I antigen DRB1*9) (DR-9) (DR9). [Source:Uniprot/SWISSPROT;Acc:Q9TQE0]	147	0.483	0.703	202	none	none	103	4.47e-05	0.493	38	0.531	0.18	49	1	0.612	17	1.97e-06	0.087	85	none	0.679	103	none	0.847	22	0.671	0.115	71	0.79	0.376	73	none	0.507	97	none	0.598	116	none	0.665	151	none	0.756	151	none	0.517	151	none	0.522
CFL2	Cofilin-2 (Cofilin, muscle isoform). [Source:Uniprot/SWISSPROT;Acc:Q9Y281]	148	0.485	0.708	129	1	0.5	189	0.6	0.913	187	1	0.605	130	1	0.612	143	0.0548	0.691	70	920	0.335	154	none	none	67	0.766	0.351	193	none	none	193	none	0.507	195	none	0.598	20	5	0.0909	112	none	0.756	115	none	0.517	116	none	0.522
TNFSF11	Tumor necrosis factor ligand superfamily member 11 (Receptor activator of nuclear factor kappa B ligand) (RANKL) (TNF-related activation- induced cytokine) (TRANCE) (Osteoprotegerin ligand) (OPGL) (Osteoclast differentiation factor) (ODF) (CD254 antigen) [Source:Uniprot/SWISSPROT;Acc:O14788]	149	0.487	0.713	155	1	0.5	22	4.47e-18	0.106	61	1	0.605	61	1	0.612	92	0.00112	0.444	133	none	0.679	175	none	none	15	0.639	0.0785	55	0.777	0.291	57	none	0.507	84	none	0.598	103	none	0.665	147	none	0.756	147	none	0.517	147	none	0.522
ZNF197	Zinc finger protein 197 (ZnF20). [Source:Uniprot/SWISSPROT;Acc:O14709]	150	0.488	0.718	130	1	0.5	157	0.117	0.758	158	1	0.605	179	none	none	202	1	0.937	25	23	0.12	135	none	none	109	0.818	0.571	29	0.735	0.153	31	none	0.507	59	none	0.598	83	none	0.665	137	none	0.756	137	none	0.517	137	none	0.522
SHBG	Sex hormone-binding globulin precursor (SHBG) (Sex steroid-binding protein) (SBP) (Testis-specific androgen-binding protein) (ABP) (Testosterone-estrogen-binding globulin) (Testosterone-estradiol- binding globulin) (TeBG). [Source:Uniprot/SWISSPROT;Acc:P04278]	151	0.497	0.722	159	1	0.5	175	0.242	0.845	173	1	0.605	186	none	none	58	4.77e-05	0.266	73	941	0.349	155	none	none	150	0.866	0.785	56	0.778	0.296	58	none	0.507	85	none	0.598	104	none	0.665	56	15.5	0.268	60	none	0.517	62	none	0.522
CFL1	Cofilin-1 (Cofilin, non-muscle isoform) (18 kDa phosphoprotein) (p18). [Source:Uniprot/SWISSPROT;Acc:P23528]	152	0.509	0.727	113	1	0.5	145	0.0461	0.7	147	1	0.605	107	1	0.612	163	0.376	0.792	184	none	0.679	20	0.0612	0.153	60	0.757	0.314	192	none	none	192	none	0.507	28	13	0.134	57	23	0.268	127	none	0.756	128	none	0.517	129	none	0.522
CBLN2	Cerebellin-2. [Source:Uniprot/SWISSPROT;Acc:Q8IUK8]	153	0.515	0.732	131	1	0.5	149	0.0699	0.715	150	1	0.605	175	none	none	105	0.00359	0.502	142	none	0.679	118	none	0.847	182	0.922	0.953	203	none	none	203	none	0.507	203	none	0.598	203	none	0.665	203	none	0.756	203	none	0.517	203	none	0.522
PDHA1	Pyruvate dehydrogenase E1 component alpha subunit, somatic form, mitochondrial precursor (EC 1.2.4.1) (PDHE1-A type I). [Source:Uniprot/SWISSPROT;Acc:P08559]	154	0.527	0.737	78	1	0.5	205	1	0.986	202	1	0.605	134	1	0.612	122	0.00774	0.58	156	none	0.679	125	none	0.847	23	0.672	0.12	123	0.84	0.651	125	none	0.507	142	none	0.598	148	none	0.665	106	164	0.507	109	none	0.517	110	none	0.522
BCAR3	Breast cancer anti-estrogen resistance protein 3 (SH2 domain- containing protein 3B) (Novel SH2-containing protein 2). [Source:Uniprot/SWISSPROT;Acc:O75815]	155	0.529	0.742	27	1	0.5	137	0.022	0.662	141	1	0.605	172	none	none	199	1	0.937	61	813	0.292	149	none	none	131	0.846	0.686	35	0.75	0.185	37	none	0.507	65	none	0.598	89	none	0.665	139	none	0.756	139	none	0.517	139	none	0.522
DNAJB1	DnaJ homolog subfamily B member 1 (Heat shock 40 kDa protein 1) (Heat shock protein 40) (HSP40) (DnaJ protein homolog 1) (HDJ-1). [Source:Uniprot/SWISSPROT;Acc:P25685]	156	0.564	0.746	91	1	0.5	186	0.6	0.913	184	1	0.605	189	none	none	165	0.376	0.792	186	none	0.679	4	0.0429	0.0305	176	0.912	0.921	127	0.846	0.672	129	none	0.507	146	none	0.598	152	none	0.665	173	none	0.756	173	none	0.517	173	none	0.522
PDE1C	Calcium/calmodulin-dependent 3\\\',5\'-cyclic nucleotide phosphodiesterase 1C (EC 3.1.4.17) (Cam-PDE 1C) (hCam-3). [Source:Uniprot/SWISSPROT;Acc:Q14123]	157	0.572	0.751	124	1	0.5	160	0.133	0.768	161	1	0.605	115	1	0.612	173	0.4	0.831	190	none	0.679	200	none	none	172	0.898	0.901	40	0.758	0.212	42	none	0.507	70	none	0.598	92	none	0.665	141	none	0.756	141	none	0.517	141	none	0.522
XBP1	X box-binding protein 1 (XBP-1) (Tax-responsive element-binding protein 5). [Source:Uniprot/SWISSPROT;Acc:P17861]	158	0.586	0.756	106	1	0.5	166	0.175	0.807	166	1	0.605	183	none	none	116	0.0074	0.546	151	none	0.679	123	none	0.847	115	0.825	0.602	108	0.829	0.571	110	none	0.507	131	none	0.598	141	none	0.665	164	none	0.756	164	none	0.517	164	none	0.522
ABHD5	Abhydrolase domain-containing protein 5. [Source:Uniprot/SWISSPROT;Acc:Q8WTS1]	159	0.587	0.761	178	1	0.5	193	0.6	0.913	191	1	0.605	194	none	none	144	0.0548	0.691	172	none	0.679	192	none	none	130	0.845	0.681	158	0.875	0.836	160	none	0.507	169	none	0.598	172	none	0.665	183	none	0.756	183	none	0.517	183	none	0.522
HSD17B7	3-keto-steroid reductase (EC 1.1.1.270) (Estradiol 17-beta- dehydrogenase 7) (EC 1.1.1.62) (17-beta-HSD 7) (17-beta-hydroxysteroid dehydrogenase 7). [Source:Uniprot/SWISSPROT;Acc:P56937]	160	0.593	0.766	177	1	0.5	150	0.0699	0.715	151	1	0.605	110	1	0.612	70	0.000164	0.338	114	none	0.679	169	none	none	147	0.864	0.77	118	0.835	0.624	120	none	0.507	139	none	0.598	146	none	0.665	169	none	0.756	169	none	0.517	169	none	0.522
KLHL1	Kelch-like protein 1. [Source:Uniprot/SWISSPROT;Acc:Q9NR64]	161	0.599	0.77	205	none	none	195	0.6	0.913	193	1	0.605	196	none	none	206	1	0.937	72	932	0.34	100	none	0.847	200	none	none	100	0.821	0.529	102	none	0.507	124	none	0.598	5	1.5	0.0144	107	none	0.756	110	none	0.517	111	none	0.522
MAP4	Microtubule-associated protein 4 (MAP 4). [Source:Uniprot/SWISSPROT;Acc:P27816]	162	0.599	0.775	61	1	0.5	152	0.0823	0.734	153	1	0.605	176	none	none	115	0.0074	0.546	150	none	0.679	122	none	0.847	158	0.876	0.827	131	0.849	0.693	133	none	0.507	150	none	0.598	8	3	0.0383	108	none	0.756	111	none	0.517	112	none	0.522
NFATC3	Nuclear factor of activated T-cells, cytoplasmic 3 (NF-ATc3) (NFATc3) (T cell transcription factor NFAT4) (NF-AT4) (NFATx). [Source:Uniprot/SWISSPROT;Acc:Q12968]	163	0.604	0.78	51	1	0.5	90	5.4e-07	0.435	108	1	0.605	87	1	0.612	188	1	0.937	40	425	0.191	13	0.0568	0.0992	152	0.869	0.796	53	0.775	0.28	55	none	0.507	82	none	0.598	102	none	0.665	146	none	0.756	146	none	0.517	146	none	0.522
ERAL1	GTP-binding protein era homolog (hERA) (ERA-W) (Conserved ERA-like GTPase) (CEGA). [Source:Uniprot/SWISSPROT;Acc:O75616]	164	0.611	0.785	181	1	0.5	181	0.44	0.87	179	1	0.605	188	none	none	177	0.459	0.855	75	992	0.359	157	none	none	133	0.847	0.696	149	0.863	0.788	151	none	0.507	162	none	0.598	166	none	0.665	179	none	0.756	179	none	0.517	179	none	0.522
CD40LG	CD40 ligand (CD40-L) (Tumor necrosis factor ligand superfamily member 5) (TNF-related activation protein) (TRAP) (T cell antigen Gp39) (CD154 antigen) [Contains: CD40 ligand, membrane form; CD40 ligand, soluble form]. [Source:Uniprot/SWISSPROT;Acc:P29965]	165	0.621	0.789	194	none	none	36	5.44e-13	0.174	70	1	0.605	66	1	0.612	52	4.64e-05	0.251	104	none	0.679	58	0.123	0.443	195	none	none	174	0.895	0.921	174	none	0.507	179	none	0.598	181	none	0.665	62	17.7	0.297	66	none	0.517	68	none	0.522
ATF4	Cyclic AMP-dependent transcription factor ATF-4 (Activating transcription factor 4) (DNA-binding protein TAXREB67) (Cyclic AMP response element-binding protein 2) (CREB2). [Source:Uniprot/SWISSPROT;Acc:P18848]	166	0.627	0.794	182	1	0.5	168	0.175	0.807	168	1	0.605	118	1	0.612	106	0.00587	0.512	143	none	0.679	119	none	0.847	118	0.831	0.618	99	0.82	0.524	101	none	0.507	123	none	0.598	136	none	0.665	160	none	0.756	160	none	0.517	160	none	0.522
PDK1	[Pyruvate dehydrogenase [lipoamide]] kinase isozyme 1, mitochondrial precursor (EC 2.7.11.2) (Pyruvate dehydrogenase kinase isoform 1). [Source:Uniprot/SWISSPROT;Acc:Q15118]	167	0.646	0.799	17	1	0.5	182	0.451	0.879	180	1	0.605	126	1	0.612	152	0.156	0.734	177	none	0.679	194	none	none	46	0.73	0.241	191	none	none	191	none	0.507	194	none	0.598	195	none	0.665	195	none	0.756	195	none	0.517	195	none	0.522
IL1A	Interleukin-1 alpha precursor (IL-1 alpha) (Hematopoietin-1). [Source:Uniprot/SWISSPROT;Acc:P01583]	168	0.651	0.804	134	1	0.5	127	0.00539	0.614	133	1	0.605	99	1	0.612	97	0.00296	0.469	137	none	0.679	117	none	0.847	180	0.919	0.942	59	0.78	0.312	61	none	0.507	88	none	0.598	107	none	0.665	49	12.5	0.234	53	none	0.517	55	none	0.522
ESRRB	Steroid hormone receptor ERR2 (Estrogen-related receptor, beta) (ERR- beta) (Estrogen receptor-like 2) (ERR beta-2). [Source:Uniprot/SWISSPROT;Acc:O95718]	169	0.658	0.809	147	1	0.5	158	0.117	0.758	159	1	0.605	180	none	none	180	0.574	0.865	195	none	0.679	203	none	none	175	0.911	0.916	202	none	none	202	none	0.507	202	none	0.598	202	none	0.665	202	none	0.756	202	none	0.517	202	none	0.522
HDAC1	Histone deacetylase 1 (HD1). [Source:Uniprot/SWISSPROT;Acc:Q13547]	170	0.668	0.813	204	none	none	163	0.152	0.783	164	1	0.605	117	1	0.612	190	1	0.937	60	807	0.287	72	0.145	0.55	120	0.831	0.628	39	0.756	0.206	41	none	0.507	69	none	0.598	69	116	0.33	104	124	0.498	107	none	0.517	108	none	0.522
CNDP2	Cytosolic nonspecific dipeptidase (Glutamate carboxypeptidase-like protein 1) (CNDP dipeptidase 2). [Source:Uniprot/SWISSPROT;Acc:Q96KP4]	171	0.669	0.818	123	1	0.5	187	0.6	0.913	185	1	0.605	190	none	none	181	0.784	0.874	57	773	0.273	147	none	none	119	0.831	0.623	81	0.799	0.429	83	none	0.507	106	none	0.598	123	none	0.665	59	16	0.282	63	none	0.517	65	none	0.522
CNDP1	Beta-Ala-His dipeptidase precursor (EC 3.4.13.20) (Carnosine dipeptidase 1) (CNDP dipeptidase 1) (Serum carnosinase) (Glutamate carboxypeptidase-like protein 2). [Source:Uniprot/SWISSPROT;Acc:Q96KN2]	172	0.679	0.823	28	1	0.5	184	0.6	0.913	182	1	0.605	128	1	0.612	64	0.000123	0.309	110	none	0.679	166	none	none	207	none	none	208	none	none	208	none	0.507	208	none	0.598	208	none	0.665	208	none	0.756	208	none	0.517	208	none	0.522
NME6	Nucleoside diphosphate kinase 6 (EC 2.7.4.6) (NDK 6) (NDP kinase 6) (nm23-H6) (Inhibitor of p53-induced apoptosis-alpha) (IPIA-alpha). [Source:Uniprot/SWISSPROT;Acc:O75414]	173	0.685	0.828	11	1	0.5	169	0.176	0.816	169	1	0.605	119	1	0.612	156	0.226	0.754	181	none	0.679	196	none	none	159	0.876	0.832	43	0.76	0.228	45	none	0.507	73	none	0.598	94	none	0.665	77	30	0.368	81	none	0.517	82	none	0.522
CCRL2	C-C chemokine receptor-like 2 (Putative MCP-1 chemokine receptor) (Chemokine receptor CCR11) (Chemokine receptor X). [Source:Uniprot/SWISSPROT;Acc:O00421]	174	0.688	0.833	50	1	0.5	59	1.18e-09	0.29	87	1	0.605	151	none	none	51	4.47e-05	0.237	30	127	0.144	137	none	none	203	none	none	180	0.906	0.952	180	none	0.507	185	none	0.598	187	none	0.665	57	15.5	0.268	61	none	0.517	63	none	0.522
TPH1	Tryptophan 5-hydroxylase 1 (EC 1.14.16.4) (Tryptophan 5-monooxygenase 1). [Source:Uniprot/SWISSPROT;Acc:P17752]	175	0.691	0.837	185	1	0.5	116	0.00109	0.56	125	1	0.605	94	1	0.612	171	0.4	0.831	69	902	0.33	153	none	none	190	0.956	0.995	181	0.907	0.958	181	none	0.507	186	none	0.598	188	none	0.665	190	none	0.756	190	none	0.517	190	none	0.522
MMP9	Matrix metalloproteinase-9 precursor (EC 3.4.24.35) (MMP-9) (92 kDa type IV collagenase) (92 kDa gelatinase) (Gelatinase B) (GELB) [Contains: 67 kDa matrix metalloproteinase-9; 82 kDa matrix metalloproteinase-9]. [Source:Uniprot/SWISSPROT;Acc:P14780]	176	0.694	0.842	203	none	none	95	1.02e-06	0.459	25	0.411	0.122	38	1	0.612	72	0.000171	0.353	116	none	0.679	37	0.0707	0.282	166	0.89	0.869	182	0.91	0.963	182	none	0.507	187	none	0.598	189	none	0.665	191	none	0.756	191	none	0.517	191	none	0.522
HES5	Transcription factor HES-5 (Hairy and enhancer of split 5). [Source:Uniprot/SWISSPROT;Acc:Q5TA89]	177	0.694	0.847	190	none	none	72	7.92e-09	0.348	94	1	0.605	155	none	none	196	1	0.937	202	none	0.679	63	0.13	0.481	197	none	none	205	none	none	205	none	0.507	205	none	0.598	205	none	0.665	205	none	0.756	205	none	0.517	205	none	0.522
DUSP7	Dual specificity protein phosphatase 7 (EC 3.1.3.48) (EC 3.1.3.16) (Dual specificity protein phosphatase PYST2). [Source:Uniprot/SWISSPROT;Acc:Q16829]	178	0.694	0.852	5	1	0.5	200	1	0.966	197	1	0.605	132	1	0.612	192	1	0.937	199	none	0.679	23	0.0635	0.176	55	0.742	0.288	154	0.874	0.815	156	none	0.507	165	none	0.598	168	none	0.665	180	none	0.756	180	none	0.517	180	none	0.522
NOX4	NADPH oxidase 4 (EC 1.6.3.-) (Kidney superoxide-producing NADPH oxidase) (KOX-1) (Renal NAD(P)H-oxidase). [Source:Uniprot/SWISSPROT;Acc:Q9NPH5]	179	0.695	0.856	68	1	0.5	107	0.000228	0.517	118	1	0.605	161	none	none	71	0.000164	0.338	115	none	0.679	111	none	0.847	187	0.933	0.979	20	0.709	0.106	22	none	0.507	54	none	0.598	80	none	0.665	135	none	0.756	135	none	0.517	135	none	0.522
IL18BP|PDE1A	Calcium/calmodulin-dependent 3\\\',5\'-cyclic nucleotide phosphodiesterase 1A (EC 3.1.4.17) (Cam-PDE 1A) (61 kDa Cam-PDE) (hCam-1). [Source:Uniprot/SWISSPROT;Acc:P54750]	180	0.712	0.861	114	1	0.5	159	0.133	0.768	160	1	0.605	114	1	0.612	56	4.77e-05	0.266	106	none	0.679	109	none	0.847	138	0.855	0.723	109	0.829	0.577	111	none	0.507	132	none	0.598	142	none	0.665	165	none	0.756	165	none	0.517	165	none	0.522
MLYCD	Malonyl-CoA decarboxylase, mitochondrial precursor (EC 4.1.1.9) (MCD). [Source:Uniprot/SWISSPROT;Acc:O95822]	181	0.721	0.866	6	1	0.5	201	1	0.986	198	1	0.605	133	1	0.612	193	1	0.937	200	none	0.679	205	none	none	4	0.588	0.0209	124	0.84	0.656	126	none	0.507	143	none	0.598	149	none	0.665	171	none	0.756	171	none	0.517	171	none	0.522
HSD17B11	Dehydrogenase/reductase SDR family member 8 precursor (EC 1.1.1.-) (17-beta-hydroxysteroid dehydrogenase 11) (17-beta-HSD 11) (17-beta- HSD XI) (17betaHSDXI) (17bHSD11) (17betaHSD11) (Retinal short-chain dehydrogenase/reductase 2) (retSDR2) (Cutaneous T-c [Source:Uniprot/SWISSPROT;Acc:Q8NBQ5]	182	0.724	0.871	132	1	0.5	207	1	0.986	204	1	0.605	204	none	none	109	0.00686	0.522	146	none	0.679	120	none	0.847	102	0.805	0.534	79	0.799	0.418	81	none	0.507	104	none	0.598	121	none	0.665	154	none	0.756	154	none	0.517	154	none	0.522
ATF6	Cyclic AMP-dependent transcription factor ATF-6 alpha (Activating transcription factor 6 alpha) (ATF6-alpha). [Source:Uniprot/SWISSPROT;Acc:P18850]	183	0.733	0.876	191	none	none	134	0.0178	0.647	139	1	0.605	171	none	none	33	1.41e-05	0.159	93	none	0.679	163	none	none	165	0.887	0.864	111	0.829	0.587	113	none	0.507	134	none	0.598	144	none	0.665	167	none	0.756	167	none	0.517	167	none	0.522
ATP8B4	Probable phospholipid-transporting ATPase IM (EC 3.6.3.1) (ATPase class I type 8B member 4). [Source:Uniprot/SWISSPROT;Acc:Q8TF62]	184	0.755	0.88	75	1	0.5	144	0.046	0.696	146	1	0.605	174	none	none	133	0.0155	0.643	43	450	0.206	51	0.108	0.389	74	0.773	0.387	186	0.942	0.984	186	none	0.507	191	none	0.598	192	none	0.665	193	none	0.756	193	none	0.517	193	none	0.522
PDK4	[Pyruvate dehydrogenase [lipoamide]] kinase isozyme 4, mitochondrial precursor (EC 2.7.11.2) (Pyruvate dehydrogenase kinase isoform 4). [Source:Uniprot/SWISSPROT;Acc:Q16654]	185	0.756	0.885	58	1	0.5	197	0.875	0.952	195	1	0.605	198	none	none	153	0.156	0.734	178	none	0.679	129	none	0.847	100	0.801	0.524	168	0.891	0.889	169	none	0.507	175	none	0.598	178	none	0.665	26	5.67	0.124	32	none	0.517	34	none	0.522
ARIH2	Protein ariadne-2 homolog (ARI-2) (Triad1 protein). [Source:Uniprot/SWISSPROT;Acc:O95376]	186	0.794	0.89	167	1	0.5	122	0.00257	0.589	130	1	0.605	168	none	none	198	1	0.937	204	none	0.679	207	none	none	25	0.678	0.131	190	none	none	190	none	0.507	193	none	0.598	194	none	0.665	194	none	0.756	194	none	0.517	194	none	0.522
KLF5	Krueppel-like factor 5 (Intestinal-enriched krueppel-like factor) (Colon krueppel-like factor) (Transcription factor BTEB2) (Basic transcription element-binding protein 2) (BTE-binding protein 2) (GC box-binding protein 2). [Source:Uniprot/SWISSPROT;Acc:Q13887]	187	0.804	0.895	201	none	none	9	3.52e-35	0.0435	51	1	0.605	147	none	none	194	1	0.937	67	891	0.321	57	0.122	0.435	153	0.869	0.801	106	0.826	0.561	108	none	0.507	129	none	0.598	140	none	0.665	163	none	0.756	163	none	0.517	163	none	0.522
HSD17B1	Estradiol 17-beta-dehydrogenase 1 (EC 1.1.1.62) (17-beta- hydroxysteroid dehydrogenase type 1) (17-beta-HSD 1) (Placental 17- beta-hydroxysteroid dehydrogenase) (20 alpha-hydroxysteroid dehydrogenase) (20-alpha-HSD) (E2DH). [Source:Uniprot/SWISSPROT;Acc:P14061]	188	0.805	0.9	90	1	0.5	206	1	0.986	203	1	0.605	203	none	none	140	0.0291	0.671	170	none	0.679	190	none	none	82	0.785	0.429	65	0.786	0.344	67	none	0.507	93	none	0.598	112	none	0.665	88	48	0.421	91	none	0.517	92	none	0.522
GNAT1	Guanine nucleotide-binding protein G(t), alpha-1 subunit (Transducin alpha-1 chain). [Source:Uniprot/SWISSPROT;Acc:P11488]	189	0.811	0.904	56	1	0.5	109	0.0003	0.527	120	1	0.605	163	none	none	150	0.118	0.725	176	none	0.679	128	none	0.847	97	0.8	0.508	95	0.817	0.503	97	none	0.507	119	none	0.598	133	none	0.665	159	none	0.756	159	none	0.517	159	none	0.522
HSD17B3	Estradiol 17-beta-dehydrogenase 3 (EC 1.1.1.62) (17-beta-HSD 3) (Testicular 17-beta-hydroxysteroid dehydrogenase). [Source:Uniprot/SWISSPROT;Acc:P37058]	190	0.818	0.909	200	none	none	81	5.58e-08	0.391	100	1	0.605	82	1	0.612	103	0.00357	0.493	140	none	0.679	179	none	none	145	0.86	0.759	156	0.875	0.825	158	none	0.507	167	none	0.598	170	none	0.665	181	none	0.756	181	none	0.517	181	none	0.522
CPS1	Carbamoyl-phosphate synthase [ammonia], mitochondrial precursor (EC 6.3.4.16) (Carbamoyl-phosphate synthetase I) (CPSase I). [Source:Uniprot/SWISSPROT;Acc:P31327]	191	0.822	0.914	137	1	0.5	191	0.6	0.913	189	1	0.605	131	1	0.612	131	0.012	0.633	38	334	0.182	142	none	none	177	0.913	0.927	167	0.888	0.884	168	none	0.507	174	none	0.598	177	none	0.665	50	12.5	0.234	54	none	0.517	56	none	0.522
CCND1	G1/S-specific cyclin-D1 (PRAD1 oncogene) (BCL-1 oncogene). [Source:Uniprot/SWISSPROT;Acc:P24385]	192	0.837	0.919	33	1	0.5	170	0.223	0.821	170	1	0.605	120	1	0.612	191	1	0.937	198	none	0.679	40	0.0717	0.305	181	0.92	0.948	184	0.917	0.974	184	none	0.507	189	none	0.598	191	none	0.665	192	none	0.756	192	none	0.517	192	none	0.522
SOD2	Superoxide dismutase [Mn], mitochondrial precursor (EC 1.15.1.1). [Source:Uniprot/SWISSPROT;Acc:P04179]	193	0.855	0.923	53	1	0.5	165	0.168	0.797	165	1	0.605	182	none	none	69	0.000164	0.333	113	none	0.679	168	none	none	208	none	none	164	0.882	0.868	165	none	0.507	173	none	0.598	176	none	0.665	93	57	0.44	96	none	0.517	97	none	0.522
AMIGO3	Amphoterin-induced protein 3 precursor (AMIGO-3) (Alivin-3). [Source:Uniprot/SWISSPROT;Acc:Q86WK7]	194	0.858	0.928	154	1	0.5	173	0.241	0.836	41	0.531	0.18	145	none	none	18	1.97e-06	0.087	86	none	0.679	161	none	none	205	none	none	206	none	none	206	none	0.507	206	none	0.598	206	none	0.665	206	none	0.756	206	none	0.517	206	none	0.522
HSD17B8	Estradiol 17-beta-dehydrogenase 8 (EC 1.1.1.62) (17-beta-HSD 8) (17- beta-hydroxysteroid dehydrogenase 8) (Protein Ke6) (Ke-6). [Source:Uniprot/SWISSPROT;Acc:Q92506]	195	0.885	0.933	208	none	none	121	0.0021	0.585	129	1	0.605	97	1	0.612	189	1	0.937	197	none	0.679	59	0.124	0.45	196	none	none	170	0.891	0.899	171	none	0.507	177	none	0.598	180	none	0.665	186	none	0.756	186	none	0.517	186	none	0.522
PDK3	[Pyruvate dehydrogenase [lipoamide]] kinase isozyme 3, mitochondrial precursor (EC 2.7.11.2) (Pyruvate dehydrogenase kinase isoform 3). [Source:Uniprot/SWISSPROT;Acc:Q15120]	196	0.888	0.938	206	none	none	196	0.868	0.947	194	1	0.605	197	none	none	154	0.205	0.744	179	none	0.679	195	none	none	52	0.739	0.272	153	0.872	0.81	155	none	0.507	164	none	0.598	167	none	0.665	61	16	0.282	65	none	0.517	67	none	0.522
SHROOM1	apical protein 2 [Source:RefSeq_peptide;Acc:NP_597713]	197	0.904	0.943	92	1	0.5	114	0.000708	0.551	208	none	none	208	none	none	117	0.0074	0.546	48	512	0.23	145	none	none	184	0.926	0.963	204	none	none	204	none	0.507	204	none	0.598	204	none	0.665	204	none	0.756	204	none	0.517	204	none	0.522
TMIE	Transmembrane inner ear expressed protein precursor. [Source:Uniprot/SWISSPROT;Acc:Q8NEW7]	198	0.907	0.947	165	1	0.5	40	1.64e-12	0.193	206	none	none	206	none	none	37	1.88e-05	0.179	94	none	0.679	164	none	none	206	none	none	207	none	none	207	none	0.507	207	none	0.598	207	none	0.665	207	none	0.756	207	none	0.517	207	none	0.522
TSHZ1	Teashirt homolog 1 (Serologically defined colon cancer antigen 3) (Antigen NY-CO-33). [Source:Uniprot/SWISSPROT;Acc:Q6ZSZ6]	199	0.91	0.952	163	1	0.5	113	0.000706	0.546	124	1	0.605	166	none	none	197	1	0.937	203	none	0.679	49	0.102	0.374	134	0.848	0.702	198	none	none	198	none	0.507	199	none	0.598	199	none	0.665	199	none	0.756	199	none	0.517	199	none	0.522
ZADH2	Zinc-binding alcohol dehydrogenase domain-containing protein 2 (EC 1.-.-.-). [Source:Uniprot/SWISSPROT;Acc:Q8N4Q0]	200	0.913	0.957	96	1	0.5	179	0.44	0.87	177	1	0.605	187	none	none	175	0.4	0.831	54	691	0.258	42	0.0728	0.321	114	0.823	0.597	197	none	none	197	none	0.507	198	none	0.598	198	none	0.665	198	none	0.756	198	none	0.517	198	none	0.522
HSD17B13	17-beta hydroxysteroid dehydrogenase 13 precursor (EC 1.1.-.-) (Short- chain dehydrogenase/reductase 9). [Source:Uniprot/SWISSPROT;Acc:Q7Z5P4]	201	0.923	0.962	66	1	0.5	204	1	0.986	201	1	0.605	202	none	none	98	0.00312	0.473	138	none	0.679	177	none	none	209	none	none	209	none	none	209	none	0.507	209	none	0.598	209	none	0.665	209	none	0.756	209	none	0.517	209	none	0.522
HSD17B14	Dehydrogenase/reductase SDR family member 10 (EC 1.1.-.-) (Retinal short-chain dehydrogenase/reductase retSDR3). [Source:Uniprot/SWISSPROT;Acc:Q9BPX1]	202	0.933	0.967	36	1	0.5	202	1	0.986	199	1	0.605	200	none	none	176	0.4	0.831	192	none	0.679	201	none	none	56	0.743	0.293	130	0.848	0.688	132	none	0.507	149	none	0.598	155	none	0.665	174	none	0.756	174	none	0.517	174	none	0.522
TCTA	T-cell leukemia translocation-associated gene protein. [Source:Uniprot/SWISSPROT;Acc:P57738]	203	0.941	0.971	34	1	0.5	208	none	none	209	none	none	209	none	none	209	none	none	64	879	0.306	70	0.143	0.534	91	0.795	0.476	147	0.862	0.778	149	none	0.507	161	none	0.598	165	none	0.665	178	none	0.756	178	none	0.517	178	none	0.522
DYNLT1	Dynein light chain Tctex-type 1 (T-complex testis-specific protein 1 homolog) (Protein CW-1). [Source:Uniprot/SWISSPROT;Acc:P63172]	204	0.95	0.976	192	none	none	194	0.6	0.913	192	1	0.605	195	none	none	205	1	0.937	44	454	0.211	97	none	0.847	73	0.773	0.382	84	0.808	0.444	86	none	0.507	109	none	0.598	17	4.5	0.0766	110	none	0.756	113	none	0.517	114	none	0.522
ARG2	Arginase-2, mitochondrial precursor (EC 3.5.3.1) (Arginase II) (Non- hepatic arginase) (Kidney-type arginase). [Source:Uniprot/SWISSPROT;Acc:P78540]	205	0.956	0.981	158	1	0.5	130	0.00796	0.628	136	1	0.605	101	1	0.612	118	0.00766	0.57	152	none	0.679	124	none	0.847	77	0.777	0.403	157	0.875	0.831	159	none	0.507	168	none	0.598	171	none	0.665	182	none	0.756	182	none	0.517	182	none	0.522
ZNF589	zinc finger protein 589 [Source:RefSeq_peptide;Acc:NP_057173]	206	0.962	0.986	84	1	0.5	156	0.117	0.758	157	1	0.605	178	none	none	201	1	0.937	74	982	0.354	156	none	none	173	0.901	0.906	61	0.781	0.323	63	none	0.507	90	none	0.598	109	none	0.665	148	none	0.756	148	none	0.517	148	none	0.522
HSD17B6	hydroxysteroid (17-beta) dehydrogenase 6 [Source:RefSeq_peptide;Acc:NP_003716]	207	0.97	0.99	44	1	0.5	203	1	0.986	200	1	0.605	201	none	none	207	1	0.937	208	none	0.679	209	none	none	157	0.876	0.822	144	0.858	0.762	146	none	0.507	158	none	0.598	162	none	0.665	96	76	0.459	99	none	0.517	100	none	0.522
FBXO15	F-box only protein 15. [Source:Uniprot/SWISSPROT;Acc:Q8NCQ5]	208	0.979	0.995	135	1	0.5	190	0.6	0.913	188	1	0.605	192	none	none	204	1	0.937	207	none	0.679	208	none	none	88	0.791	0.461	195	none	none	195	none	0.507	197	none	0.598	197	none	0.665	197	none	0.756	197	none	0.517	197	none	0.522
SS18L2	SS18-like protein 2 (SYT homolog 2). [Source:Uniprot/SWISSPROT;Acc:Q9UHA2]	209	0.985	1	49	1	0.5	209	none	none	205	1	0.605	205	none	none	208	none	none	209	none	0.679	131	none	0.847	64	0.761	0.335	21	0.717	0.111	23	none	0.507	55	none	0.598	81	none	0.665	136	none	0.756	136	none	0.517	136	none	0.522
[truncated: 15 more columns]
