# Supplementary material for: An evidence-based knowledgebase of pulmonary arterial hypertension to identify genes and pathways relevant to pathogenesis
Source: Royal Society of Chemistry journal article supplement (doi:10.1039/c3mb70496c), 2014-01-10
Supplement: c3mb70496c_3.xlsx [file c3mb70496c_3.xlsx]

## Sheet: Interpro_david
Table S3. The enriched InterPro domains in the 261 human PAH-related genes.
Category	Term	p-value	FDR
INTERPRO	IPR002347:Glucose/ribitol dehydrogenase	9.43442e-11	1.36313e-07
INTERPRO	IPR002198:Short-chain dehydrogenase/reductase SDR	3.22764e-10	4.66343e-07
INTERPRO	IPR013019:MAD homology, MH1	2.2781e-08	3.29149e-05
INTERPRO	IPR001132:SMAD domain, Dwarfin-type	2.2781e-08	3.29149e-05
INTERPRO	IPR013790:Dwarfin	2.2781e-08	3.29149e-05
INTERPRO	IPR017855:SMAD domain-like	2.50031e-08	3.61256e-05
INTERPRO	IPR016040:NAD(P)-binding domain	1.19737e-07	0.000173
INTERPRO	IPR003619:MAD homology 1, Dwarfin-type	3.08313e-07	0.000445462
INTERPRO	IPR000472:TGF-beta receptor/activin receptor, type I/II	9.75248e-06	0.0140899
INTERPRO	IPR005467:Signal transduction histidine kinase, core	2.35154e-05	0.0339707
INTERPRO	IPR018955:Branched-chain alpha-ketoacid dehydrogenase kinase/Pyruvate dehydrogenase kinase, mitochondrial	2.35154e-05	0.0339707
